# Supplementary material
Source: publisher figshare collection journal article supplement (https://gsajournals.figshare.com/articles/dataset/_/12869570)
Supplement: Supplementary file 1 [file 2]

A

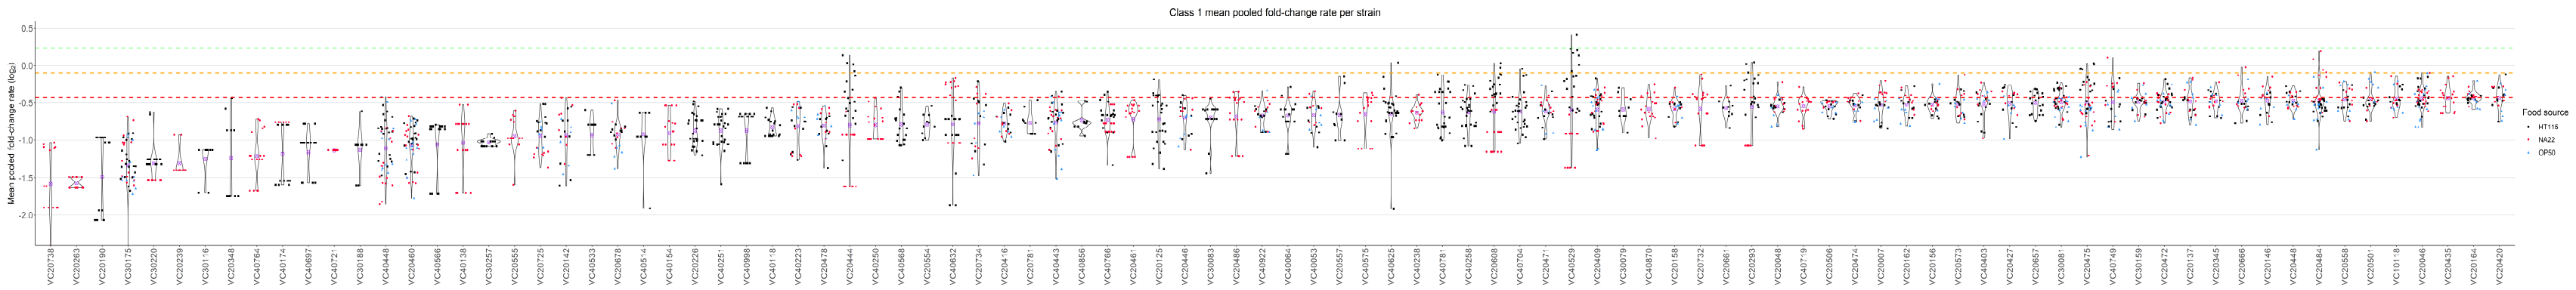

B

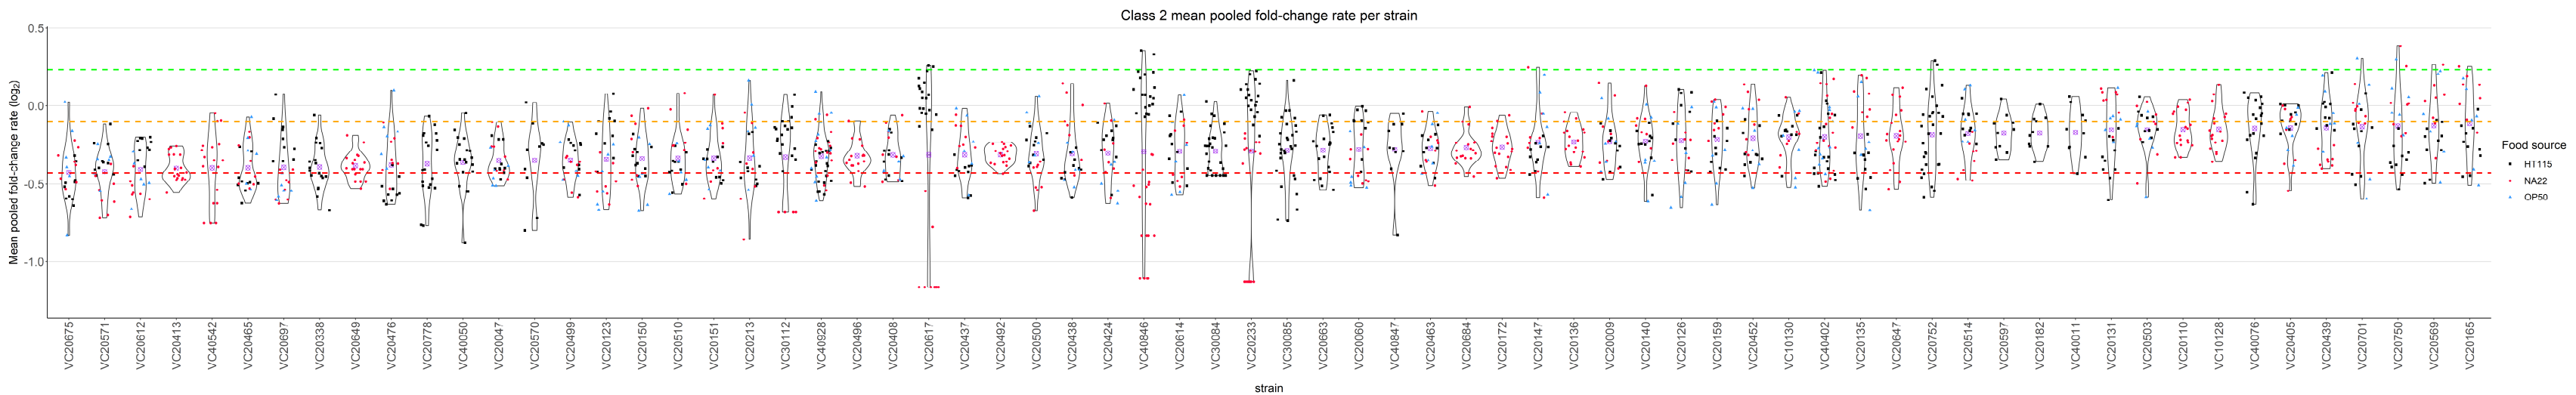

C

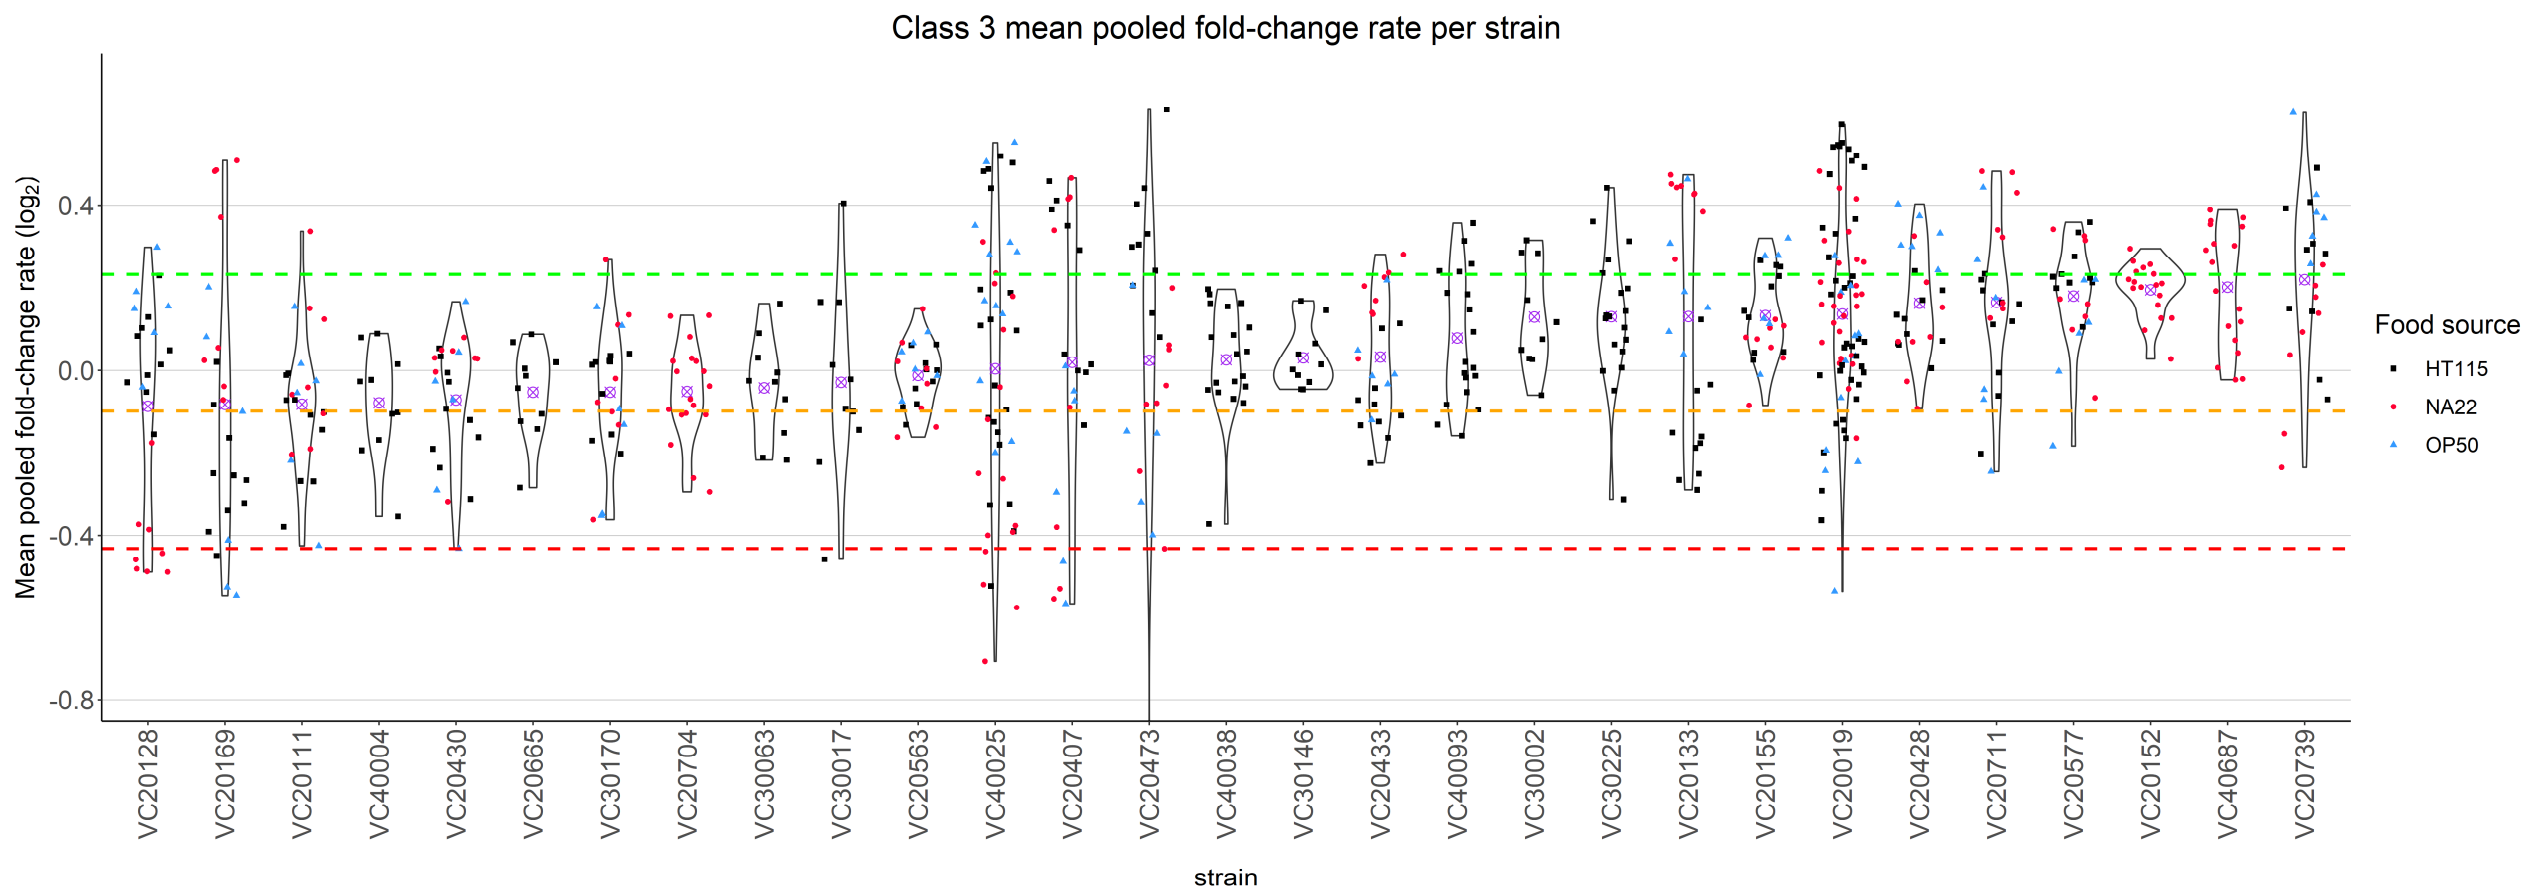

D

Class 4 mean pooled fold-change rate per strain

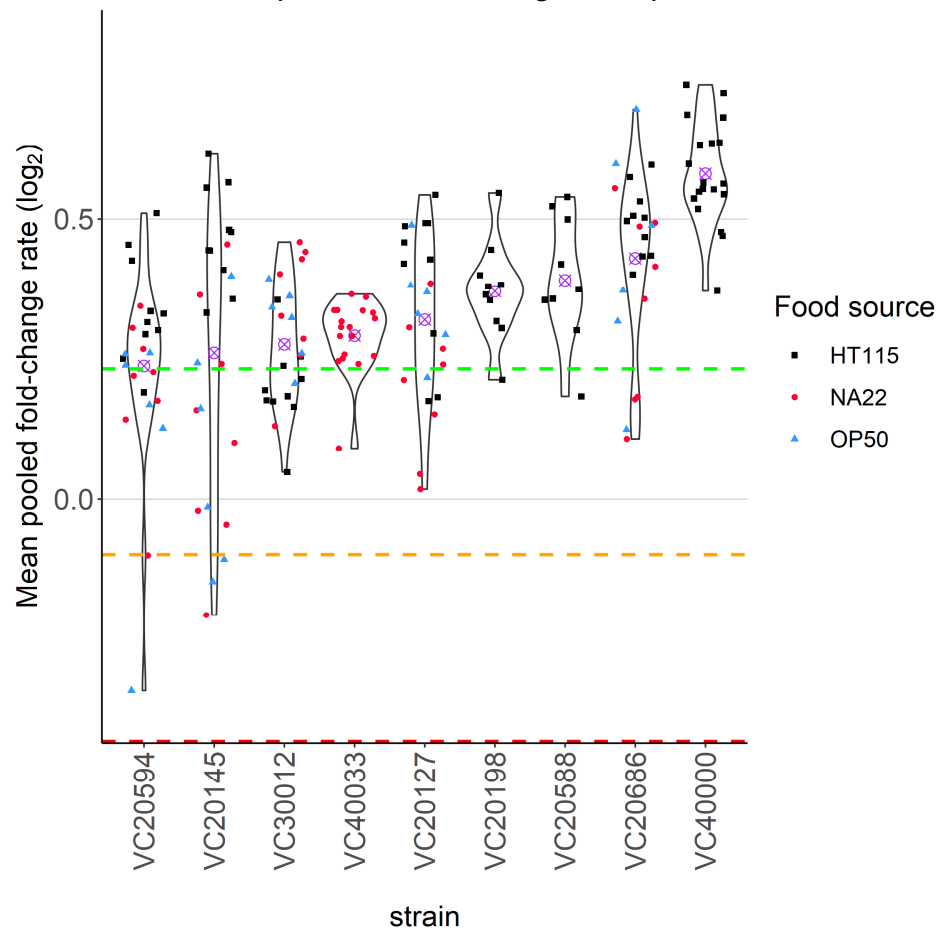

**Supplemental Figure S5. PhenoMIP can generate a gradient of fitness phenotypes from severe to subtle.** Violin plots of mean fold-change rate per replicate for 202 MMP strains across the 4 defined classes 1 (A), class 2 (B), class 3 (C), and class 4 (D). Each violin plot discriminates between food sources HT115 (black squares), NA22 (red circles) and OP50 (blue triangles). Strains are sorted within class by the mean FCR ( $\log_2$ , purple  $\otimes$ ) of all replicate conditions for that strain. Coloured dotted lines represent category boundaries using an FCR of -0.4315 (red), -0.0985 (yellow), and 0.2327 (green).
