# Supplementary material
Source: publisher figshare collection journal article supplement (https://gsajournals.figshare.com/articles/dataset/_/12869570)
Supplement: Supplementary file 1 [file 2]

## Sheet: fold-change.data.MMP
series	strain	mean.fcr	rep.num	group	original.name	pool
HT115-01	VC10118	-0.469339	1	HT115	M10.R01.E02	M10
HT115-02	VC10118	-0.512313	2	HT115	M10.R02.E02	M10
HT115-03	VC10118	-0.485565	3	HT115	M10.R03.E02	M10
HT115-04	VC10118	-0.52645	4	HT115	M10.R04.E02	M10
HT115-05	VC10118	-0.507728	5	HT115	M10.R05.E02	M10
HT115-06	VC10118	-0.3179	6	HT115	M10.R06.E02	M10
HT115-07	VC10118	-0.459608	7	HT115	M10.R07.E02	M10
HT115-08	VC10118	-0.428588	8	HT115	M10.R08.E02	M10
HT115-09	VC10118	-0.280416	9	HT115	M10.R09.E02	M10
HT115-10	VC10118	-0.256526	10	HT115	M10.R10.E02	M10
Na22-01	VC10118	-0.46242	17	NA22	M10.R17.E02	M10
Na22-02	VC10118	-0.700118	18	NA22	M10.R18.E02	M10
Na22-03	VC10118	-0.568676	19	NA22	M10.R19.E02	M10
Na22-04	VC10118	-0.504747	20	NA22	M10.R20.E02	M10
Na22-05	VC10118	-0.474207	21	NA22	M10.R21.E02	M10
Na22-06	VC10118	-0.536943	22	NA22	M10.R22.E02	M10
Na22-07	VC10118	-0.144733	23	NA22	M10.R23.E02	M10
Na22-08	VC10118	-0.242921	24	NA22	M10.R24.E02	M10
OP50-01	VC10118	-0.559174	11	OP50	M10.R11.E02	M10
OP50-02	VC10118	-0.637061	12	OP50	M10.R12.E02	M10
OP50-03	VC10118	-0.571274	13	OP50	M10.R13.E02	M10
OP50-04	VC10118	-0.59141	14	OP50	M10.R14.E02	M10
OP50-05	VC10118	-0.208745	15	OP50	M10.R15.E02	M10
OP50-06	VC10118	-0.251339	16	OP50	M10.R16.E02	M10
Na22-A1	VC10128	-0.16431	1	NA22	M1.R01.E05A.R01.E02	M1
Na22-A2	VC10128	-0.359336	2	NA22	M1.R01.E05A.R02.E02	M1
Na22-A3	VC10128	-0.155969	3	NA22	M1.R01.E05A.R03.E02	M1
Na22-A4	VC10128	-0.186329	4	NA22	M1.R01.E05A.R04.E02	M1
Na22-B5	VC10128	-0.30975	5	NA22	M1.R01.E05B.R01.E02	M1
Na22-B6	VC10128	-0.208797	6	NA22	M1.R01.E05B.R02.E02	M1
Na22-B7	VC10128	-0.298018	7	NA22	M1.R01.E05B.R03.E02	M1
Na22-B8	VC10128	-0.27418	8	NA22	M1.R01.E05B.R04.E02	M1
Na22-A2	VC10128	-0.0716278	2	NA22	M3.10K.R02.E02A	M3
Na22-A5	VC10128	-0.052304	6	NA22	M3.10K.R05.E02A	M3
Na22-A7	VC10128	-0.113099	7	NA22	M3.10K.R07.E02A	M3
Na22-A8	VC10128	0.0761889	9	NA22	M3.10K.R08.E02A	M3
Na22-B1	VC10128	-0.192059	1	NA22	M3.10K.R01.E02B	M3
Na22-B2	VC10128	-0.0804066	3	NA22	M3.10K.R02.E02B	M3
Na22-B3	VC10128	-0.22069	4	NA22	M3.10K.R03.E02B	M3
Na22-B4	VC10128	-0.233079	5	NA22	M3.10K.R04.E02B	M3
Na22-B7	VC10128	0.0318371	8	NA22	M3.10K.R07.E02B	M3
Na22-B8	VC10128	0.136227	10	NA22	M3.10K.R08.E02B	M3
HT115-01	VC10130	-0.184533	1	HT115	M10.R01.E02	M10
HT115-02	VC10130	-0.450556	2	HT115	M10.R02.E02	M10
HT115-03	VC10130	-0.151635	3	HT115	M10.R03.E02	M10
HT115-04	VC10130	-0.193242	4	HT115	M10.R04.E02	M10
HT115-05	VC10130	-0.184254	5	HT115	M10.R05.E02	M10
HT115-06	VC10130	-0.163277	6	HT115	M10.R06.E02	M10
HT115-07	VC10130	-0.156346	7	HT115	M10.R07.E02	M10
HT115-08	VC10130	-0.130198	8	HT115	M10.R08.E02	M10
HT115-09	VC10130	-0.060983	9	HT115	M10.R09.E02	M10
HT115-10	VC10130	-0.0622982	10	HT115	M10.R10.E02	M10
Na22-01	VC10130	-0.318768	17	NA22	M10.R17.E02	M10
Na22-02	VC10130	-0.394143	18	NA22	M10.R18.E02	M10
Na22-03	VC10130	-0.165769	19	NA22	M10.R19.E02	M10
Na22-04	VC10130	-0.179452	20	NA22	M10.R20.E02	M10
Na22-05	VC10130	-0.22173	21	NA22	M10.R21.E02	M10
Na22-06	VC10130	-0.243545	22	NA22	M10.R22.E02	M10
Na22-07	VC10130	0.0559449	23	NA22	M10.R23.E02	M10
Na22-08	VC10130	-0.0502039	24	NA22	M10.R24.E02	M10
OP50-01	VC10130	-0.521076	11	OP50	M10.R11.E02	M10
OP50-02	VC10130	-0.281744	12	OP50	M10.R12.E02	M10
OP50-03	VC10130	-0.190425	13	OP50	M10.R13.E02	M10
OP50-04	VC10130	-0.461812	14	OP50	M10.R14.E02	M10
OP50-05	VC10130	-0.0370147	15	OP50	M10.R15.E02	M10
OP50-06	VC10130	-0.0315761	16	OP50	M10.R16.E02	M10
HT115-01	VC20007	-0.529614	1	HT115	M10.R01.E02	M10
HT115-02	VC20007	-0.562974	2	HT115	M10.R02.E02	M10
HT115-03	VC20007	-0.767882	3	HT115	M10.R03.E02	M10
HT115-04	VC20007	-0.811421	4	HT115	M10.R04.E02	M10
HT115-05	VC20007	-0.521093	5	HT115	M10.R05.E02	M10
HT115-06	VC20007	-0.527614	6	HT115	M10.R06.E02	M10
HT115-07	VC20007	-0.846241	7	HT115	M10.R07.E02	M10
HT115-08	VC20007	-0.536757	8	HT115	M10.R08.E02	M10
HT115-09	VC20007	-0.49823	9	HT115	M10.R09.E02	M10
HT115-10	VC20007	-0.823599	10	HT115	M10.R10.E02	M10
Na22-01	VC20007	-0.266075	17	NA22	M10.R17.E02	M10
Na22-02	VC20007	-0.383897	18	NA22	M10.R18.E02	M10
Na22-03	VC20007	-0.361071	19	NA22	M10.R19.E02	M10
Na22-04	VC20007	-0.481435	20	NA22	M10.R20.E02	M10
Na22-05	VC20007	-0.363777	21	NA22	M10.R21.E02	M10
Na22-06	VC20007	-0.371199	22	NA22	M10.R22.E02	M10
Na22-07	VC20007	-0.206352	23	NA22	M10.R23.E02	M10
Na22-08	VC20007	-0.364048	24	NA22	M10.R24.E02	M10
OP50-01	VC20007	-0.750095	11	OP50	M10.R11.E02	M10
OP50-02	VC20007	-0.474195	12	OP50	M10.R12.E02	M10
OP50-03	VC20007	-0.569268	13	OP50	M10.R13.E02	M10
OP50-04	VC20007	-0.730839	14	OP50	M10.R14.E02	M10
OP50-05	VC20007	-0.57601	15	OP50	M10.R15.E02	M10
OP50-06	VC20007	-0.447138	16	OP50	M10.R16.E02	M10
HT115-01	VC20009	-0.287666	1	HT115	M10.R01.E02	M10
HT115-02	VC20009	-0.112588	2	HT115	M10.R02.E02	M10
HT115-03	VC20009	-0.25766	3	HT115	M10.R03.E02	M10
HT115-04	VC20009	-0.392137	4	HT115	M10.R04.E02	M10
HT115-05	VC20009	-0.220486	5	HT115	M10.R05.E02	M10
HT115-06	VC20009	-0.239086	6	HT115	M10.R06.E02	M10
HT115-07	VC20009	-0.203848	7	HT115	M10.R07.E02	M10
HT115-08	VC20009	-0.15642	8	HT115	M10.R08.E02	M10
HT115-09	VC20009	-0.469678	9	HT115	M10.R09.E02	M10
HT115-10	VC20009	-0.424426	10	HT115	M10.R10.E02	M10
Na22-01	VC20009	-0.400408	17	NA22	M10.R17.E02	M10
Na22-02	VC20009	-0.226319	18	NA22	M10.R18.E02	M10
Na22-03	VC20009	-0.352698	19	NA22	M10.R19.E02	M10
Na22-04	VC20009	-0.179827	20	NA22	M10.R20.E02	M10
Na22-05	VC20009	0.0676148	21	NA22	M10.R21.E02	M10
Na22-06	VC20009	-0.132568	22	NA22	M10.R22.E02	M10
Na22-07	VC20009	0.149683	23	NA22	M10.R23.E02	M10
Na22-08	VC20009	-0.366035	24	NA22	M10.R24.E02	M10
OP50-01	VC20009	-0.421933	11	OP50	M10.R11.E02	M10
OP50-02	VC20009	-0.227272	12	OP50	M10.R12.E02	M10
OP50-03	VC20009	-0.0807119	13	OP50	M10.R13.E02	M10
OP50-04	VC20009	-0.36012	14	OP50	M10.R14.E02	M10
OP50-05	VC20009	-0.241784	15	OP50	M10.R15.E02	M10
OP50-06	VC20009	0.0499423	16	OP50	M10.R16.E02	M10
Na22-A2	VC20019	0.155297	2	NA22	M3.10K.R02.E02A	M3
Na22-A5	VC20019	0.0941904	6	NA22	M3.10K.R05.E02A	M3
Na22-A7	VC20019	0.0358499	7	NA22	M3.10K.R07.E02A	M3
Na22-A8	VC20019	0.213785	9	NA22	M3.10K.R08.E02A	M3
Na22-B1	VC20019	-0.163917	1	NA22	M3.10K.R01.E02B	M3
Na22-B2	VC20019	0.184822	3	NA22	M3.10K.R02.E02B	M3
Na22-B3	VC20019	0.017051	4	NA22	M3.10K.R03.E02B	M3
Na22-B4	VC20019	0.0152974	5	NA22	M3.10K.R04.E02B	M3
Na22-B7	VC20019	0.182434	8	NA22	M3.10K.R07.E02B	M3
Na22-B8	VC20019	0.262295	10	NA22	M3.10K.R08.E02B	M3
ceh-18	VC20019	0.18383	51	HT115	M05.R51.E02	M5
ceh-2	VC20019	0.228534	1	HT115	M05.R01.E02	M5
dpy-11	VC20019	0.273822	74	HT115	M05.RC2.E02	M5
hbl-1	VC20019	0.366476	52	HT115	M05.R52.E02	M5
HT115	VC20019	0.33054	73	HT115	M05.RC1.E02	M5
nhr-23	VC20019	0.0766549	2	HT115	M05.R02.E02	M5
pqn-21	VC20019	0.0555939	3	HT115	M05.R03.E02	M5
somi-1	VC20019	0.344834	47	HT115	M05.R47.E02	M5
unc-22	VC20019	0.217195	75	HT115	M05.RC3.E02	M5
unc-39	VC20019	0.200119	48	HT115	M05.R48.E02	M5
HT115-01	VC20019	0.595591	1	HT115	M08.R01.E03	M8
HT115-02	VC20019	0.49234	2	HT115	M08.R02.E03	M8
HT115-03	VC20019	0.475274	3	HT115	M08.R03.E03	M8
HT115-04	VC20019	0.546578	4	HT115	M08.R04.E03	M8
HT115-05	VC20019	0.541299	5	HT115	M08.R05.E03	M8
HT115-06	VC20019	0.536023	6	HT115	M08.R06.E03	M8
HT115-07	VC20019	0.506978	7	HT115	M08.R07.E03	M8
HT115-08	VC20019	0.520392	8	HT115	M08.R08.E03	M8
HT115-09	VC20019	0.551797	9	HT115	M08.R09.E03	M8
HT115-10	VC20019	0.542873	10	HT115	M08.R10.E03	M8
HT115-01	VC20019	0.065026	1	HT115	M10.R01.E02	M10
HT115-02	VC20019	-0.363199	2	HT115	M10.R02.E02	M10
HT115-03	VC20019	-0.145055	3	HT115	M10.R03.E02	M10
HT115-04	VC20019	-0.291226	4	HT115	M10.R04.E02	M10
HT115-05	VC20019	0.0692971	5	HT115	M10.R05.E02	M10
HT115-06	VC20019	-0.119887	6	HT115	M10.R06.E02	M10
HT115-07	VC20019	-0.0012604	7	HT115	M10.R07.E02	M10
HT115-08	VC20019	-0.022968	8	HT115	M10.R08.E02	M10
HT115-09	VC20019	0.0584024	9	HT115	M10.R09.E02	M10
HT115-10	VC20019	0.211384	10	HT115	M10.R10.E02	M10
Na22-01	VC20019	0.155515	17	NA22	M10.R17.E02	M10
Na22-02	VC20019	0.0285178	18	NA22	M10.R18.E02	M10
Na22-03	VC20019	0.259977	19	NA22	M10.R19.E02	M10
Na22-04	VC20019	0.268799	20	NA22	M10.R20.E02	M10
Na22-05	VC20019	0.441634	21	NA22	M10.R21.E02	M10
Na22-06	VC20019	0.415634	22	NA22	M10.R22.E02	M10
Na22-07	VC20019	0.482692	23	NA22	M10.R23.E02	M10
Na22-08	VC20019	0.314169	24	NA22	M10.R24.E02	M10
OP50-01	VC20019	-0.243515	11	OP50	M10.R11.E02	M10
OP50-02	VC20019	-0.221443	12	OP50	M10.R12.E02	M10
OP50-03	VC20019	0.0232737	13	OP50	M10.R13.E02	M10
OP50-04	VC20019	0.0341996	14	OP50	M10.R14.E02	M10
OP50-05	VC20019	0.277393	15	OP50	M10.R15.E02	M10
OP50-06	VC20019	0.188657	16	OP50	M10.R16.E02	M10
HT115-01	VC20019	-0.00505372	1	HT115	M11.R01.E02	M11
HT115-02	VC20019	-0.164137	2	HT115	M11.R02.E02	M11
HT115-03	VC20019	-0.198642	3	HT115	M11.R03.E02	M11
HT115-04	VC20019	-0.0118682	4	HT115	M11.R04.E02	M11
HT115-05	VC20019	-0.0693475	5	HT115	M11.R05.E02	M11
HT115.liquid-01	VC20019	-0.0344064	6	HT115	M11.R06.E02	M11
HT115.liquid-02	VC20019	0.0345481	7	HT115	M11.R07.E02	M11
HT115.liquid-03	VC20019	0.00960521	8	HT115	M11.R08.E02	M11
HT115.liquid-04	VC20019	-0.129383	9	HT115	M11.R09.E02	M11
HT115.liquid-05	VC20019	0.0124063	10	HT115	M11.R10.E02	M11
Na22-01	VC20019	-0.0446472	17	NA22	M11.R17.E02	M11
Na22-02	VC20019	0.180378	18	NA22	M11.R18.E02	M11
Na22-03	VC20019	0.115031	19	NA22	M11.R19.E02	M11
Na22-04	VC20019	0.159949	20	NA22	M11.R20.E02	M11
Na22.liquid-01	VC20019	0.205044	21	NA22	M11.R21.E02	M11
Na22.liquid-02	VC20019	0.335713	22	NA22	M11.R22.E02	M11
Na22.liquid-03	VC20019	0.131845	23	NA22	M11.R23.E02	M11
Na22.liquid-04	VC20019	0.0676268	24	NA22	M11.R24.E02	M11
OP50-01	VC20019	0.204671	11	OP50	M11.R11.E02	M11
OP50-02	VC20019	0.0836546	12	OP50	M11.R12.E02	M11
OP50-03	VC20019	-0.193709	13	OP50	M11.R13.E02	M11
OP50-04	VC20019	-0.535156	14	OP50	M11.R14.E02	M11
OP50-05	VC20019	0.088649	15	OP50	M11.R15.E02	M11
OP50-06	VC20019	-0.066889	16	OP50	M11.R16.E02	M11
HT115-01	VC20046	-0.445555	1	HT115	M10.R01.E02	M10
HT115-02	VC20046	-0.687855	2	HT115	M10.R02.E02	M10
HT115-03	VC20046	-0.521867	3	HT115	M10.R03.E02	M10
HT115-04	VC20046	-0.523475	4	HT115	M10.R04.E02	M10
HT115-05	VC20046	-0.403357	5	HT115	M10.R05.E02	M10
HT115-06	VC20046	-0.478815	6	HT115	M10.R06.E02	M10
HT115-07	VC20046	-0.508625	7	HT115	M10.R07.E02	M10
HT115-08	VC20046	-0.344992	8	HT115	M10.R08.E02	M10
HT115-09	VC20046	-0.478589	9	HT115	M10.R09.E02	M10
HT115-10	VC20046	-0.46973	10	HT115	M10.R10.E02	M10
Na22-01	VC20046	-0.441139	17	NA22	M10.R17.E02	M10
Na22-02	VC20046	-0.613934	18	NA22	M10.R18.E02	M10
Na22-03	VC20046	-0.457824	19	NA22	M10.R19.E02	M10
Na22-04	VC20046	-0.346193	20	NA22	M10.R20.E02	M10
Na22-05	VC20046	-0.42121	21	NA22	M10.R21.E02	M10
Na22-06	VC20046	-0.479959	22	NA22	M10.R22.E02	M10
Na22-07	VC20046	-0.395644	23	NA22	M10.R23.E02	M10
Na22-08	VC20046	-0.368058	24	NA22	M10.R24.E02	M10
OP50-01	VC20046	-0.721736	11	OP50	M10.R11.E02	M10
OP50-02	VC20046	-0.824113	12	OP50	M10.R12.E02	M10
OP50-03	VC20046	-0.556528	13	OP50	M10.R13.E02	M10
OP50-04	VC20046	-0.588366	14	OP50	M10.R14.E02	M10
OP50-05	VC20046	-0.484401	15	OP50	M10.R15.E02	M10
OP50-06	VC20046	-0.383105	16	OP50	M10.R16.E02	M10
HT115-01	VC20046	-0.504933	1	HT115	M11.R01.E02	M11
HT115-02	VC20046	-0.544549	2	HT115	M11.R02.E02	M11
HT115-03	VC20046	-0.56461	3	HT115	M11.R03.E02	M11
HT115-04	VC20046	-0.512913	4	HT115	M11.R04.E02	M11
HT115-05	VC20046	-0.436025	5	HT115	M11.R05.E02	M11
HT115.liquid-01	VC20046	-0.169939	6	HT115	M11.R06.E02	M11
HT115.liquid-02	VC20046	-0.17227	7	HT115	M11.R07.E02	M11
HT115.liquid-03	VC20046	-0.152719	8	HT115	M11.R08.E02	M11
HT115.liquid-04	VC20046	-0.290224	9	HT115	M11.R09.E02	M11
HT115.liquid-05	VC20046	-0.30685	10	HT115	M11.R10.E02	M11
Na22-01	VC20046	-0.55036	17	NA22	M11.R17.E02	M11
Na22-02	VC20046	-0.512217	18	NA22	M11.R18.E02	M11
Na22-03	VC20046	-0.340594	19	NA22	M11.R19.E02	M11
Na22-04	VC20046	-0.0974023	20	NA22	M11.R20.E02	M11
Na22.liquid-01	VC20046	-0.359754	21	NA22	M11.R21.E02	M11
Na22.liquid-02	VC20046	-0.499768	22	NA22	M11.R22.E02	M11
Na22.liquid-03	VC20046	-0.321382	23	NA22	M11.R23.E02	M11
Na22.liquid-04	VC20046	-0.32759	24	NA22	M11.R24.E02	M11
OP50-01	VC20046	-0.278001	11	OP50	M11.R11.E02	M11
OP50-02	VC20046	-0.326892	12	OP50	M11.R12.E02	M11
OP50-03	VC20046	-0.830183	13	OP50	M11.R13.E02	M11
OP50-04	VC20046	-0.738147	14	OP50	M11.R14.E02	M11
OP50-05	VC20046	-0.103009	15	OP50	M11.R15.E02	M11
OP50-06	VC20046	-0.381222	16	OP50	M11.R16.E02	M11
HT115-01	VC20047	-0.39879	1	HT115	M10.R01.E02	M10
HT115-02	VC20047	-0.469932	2	HT115	M10.R02.E02	M10
HT115-03	VC20047	-0.402273	3	HT115	M10.R03.E02	M10
HT115-04	VC20047	-0.429756	4	HT115	M10.R04.E02	M10
HT115-05	VC20047	-0.19001	5	HT115	M10.R05.E02	M10
HT115-06	VC20047	-0.211947	6	HT115	M10.R06.E02	M10
HT115-07	VC20047	-0.400214	7	HT115	M10.R07.E02	M10
HT115-08	VC20047	-0.374097	8	HT115	M10.R08.E02	M10
HT115-09	VC20047	-0.408862	9	HT115	M10.R09.E02	M10
HT115-10	VC20047	-0.212597	10	HT115	M10.R10.E02	M10
Na22-01	VC20047	-0.470285	17	NA22	M10.R17.E02	M10
Na22-02	VC20047	-0.416721	18	NA22	M10.R18.E02	M10
Na22-03	VC20047	-0.41301	19	NA22	M10.R19.E02	M10
Na22-04	VC20047	-0.326359	20	NA22	M10.R20.E02	M10
Na22-05	VC20047	-0.260396	21	NA22	M10.R21.E02	M10
Na22-06	VC20047	-0.260916	22	NA22	M10.R22.E02	M10
Na22-07	VC20047	-0.13203	23	NA22	M10.R23.E02	M10
Na22-08	VC20047	-0.10355	24	NA22	M10.R24.E02	M10
OP50-01	VC20047	-0.463436	11	OP50	M10.R11.E02	M10
OP50-02	VC20047	-0.412983	12	OP50	M10.R12.E02	M10
OP50-03	VC20047	-0.26746	13	OP50	M10.R13.E02	M10
OP50-04	VC20047	-0.511369	14	OP50	M10.R14.E02	M10
OP50-05	VC20047	-0.385268	15	OP50	M10.R15.E02	M10
OP50-06	VC20047	-0.508895	16	OP50	M10.R16.E02	M10
HT115-01	VC20048	-0.575529	1	HT115	M10.R01.E02	M10
HT115-02	VC20048	-0.50561	2	HT115	M10.R02.E02	M10
HT115-03	VC20048	-0.527952	3	HT115	M10.R03.E02	M10
HT115-04	VC20048	-0.6268	4	HT115	M10.R04.E02	M10
HT115-05	VC20048	-0.554167	5	HT115	M10.R05.E02	M10
HT115-06	VC20048	-0.539546	6	HT115	M10.R06.E02	M10
HT115-07	VC20048	-0.456623	7	HT115	M10.R07.E02	M10
HT115-08	VC20048	-0.547905	8	HT115	M10.R08.E02	M10
HT115-09	VC20048	-0.563947	9	HT115	M10.R09.E02	M10
HT115-10	VC20048	-0.586247	10	HT115	M10.R10.E02	M10
Na22-01	VC20048	-0.454093	17	NA22	M10.R17.E02	M10
Na22-02	VC20048	-0.616306	18	NA22	M10.R18.E02	M10
Na22-03	VC20048	-0.450145	19	NA22	M10.R19.E02	M10
Na22-04	VC20048	-0.545331	20	NA22	M10.R20.E02	M10
Na22-05	VC20048	-0.514486	21	NA22	M10.R21.E02	M10
Na22-06	VC20048	-0.586944	22	NA22	M10.R22.E02	M10
Na22-07	VC20048	-0.223904	23	NA22	M10.R23.E02	M10
Na22-08	VC20048	-0.623399	24	NA22	M10.R24.E02	M10
OP50-01	VC20048	-0.800541	11	OP50	M10.R11.E02	M10
OP50-02	VC20048	-0.818471	12	OP50	M10.R12.E02	M10
OP50-03	VC20048	-0.567082	13	OP50	M10.R13.E02	M10
OP50-04	VC20048	-0.668018	14	OP50	M10.R14.E02	M10
OP50-05	VC20048	-0.435436	15	OP50	M10.R15.E02	M10
OP50-06	VC20048	-0.392701	16	OP50	M10.R16.E02	M10
HT115-01	VC20060	-0.343221	1	HT115	M10.R01.E02	M10
HT115-02	VC20060	-0.423408	2	HT115	M10.R02.E02	M10
HT115-03	VC20060	-0.0933868	3	HT115	M10.R03.E02	M10
HT115-04	VC20060	-0.0302154	4	HT115	M10.R04.E02	M10
HT115-05	VC20060	-0.00406773	5	HT115	M10.R05.E02	M10
HT115-06	VC20060	-0.0252572	6	HT115	M10.R06.E02	M10
HT115-07	VC20060	-0.105443	7	HT115	M10.R07.E02	M10
HT115-08	VC20060	-0.141811	8	HT115	M10.R08.E02	M10
HT115-09	VC20060	-0.0923679	9	HT115	M10.R09.E02	M10
HT115-10	VC20060	-0.0977371	10	HT115	M10.R10.E02	M10
Na22-01	VC20060	-0.44797	17	NA22	M10.R17.E02	M10
Na22-02	VC20060	-0.476627	18	NA22	M10.R18.E02	M10
Na22-03	VC20060	-0.340989	19	NA22	M10.R19.E02	M10
Na22-04	VC20060	-0.497201	20	NA22	M10.R20.E02	M10
Na22-05	VC20060	-0.276744	21	NA22	M10.R21.E02	M10
Na22-06	VC20060	-0.278234	22	NA22	M10.R22.E02	M10
Na22-07	VC20060	-0.183168	23	NA22	M10.R23.E02	M10
Na22-08	VC20060	-0.483108	24	NA22	M10.R24.E02	M10
OP50-01	VC20060	-0.491274	11	OP50	M10.R11.E02	M10
OP50-02	VC20060	-0.522417	12	OP50	M10.R12.E02	M10
OP50-03	VC20060	-0.453962	13	OP50	M10.R13.E02	M10
OP50-04	VC20060	-0.509669	14	OP50	M10.R14.E02	M10
OP50-05	VC20060	-0.161781	15	OP50	M10.R15.E02	M10
OP50-06	VC20060	-0.265195	16	OP50	M10.R16.E02	M10
Na22-A1	VC20110	0.0197271	1	NA22	M1.R01.E05A.R01.E02	M1
Na22-A2	VC20110	-0.00612904	2	NA22	M1.R01.E05A.R02.E02	M1
Na22-A3	VC20110	-0.0362076	3	NA22	M1.R01.E05A.R03.E02	M1
Na22-A4	VC20110	0.0409741	4	NA22	M1.R01.E05A.R04.E02	M1
Na22-B5	VC20110	-0.144584	5	NA22	M1.R01.E05B.R01.E02	M1
Na22-B6	VC20110	-0.219179	6	NA22	M1.R01.E05B.R02.E02	M1
Na22-B7	VC20110	-0.024796	7	NA22	M1.R01.E05B.R03.E02	M1
Na22-B8	VC20110	-0.214768	8	NA22	M1.R01.E05B.R04.E02	M1
Na22-A2	VC20110	-0.0525958	2	NA22	M3.10K.R02.E02A	M3
Na22-A5	VC20110	-0.122059	6	NA22	M3.10K.R05.E02A	M3
Na22-A7	VC20110	-0.135434	7	NA22	M3.10K.R07.E02A	M3
Na22-A8	VC20110	-0.252359	9	NA22	M3.10K.R08.E02A	M3
Na22-B1	VC20110	-0.232837	1	NA22	M3.10K.R01.E02B	M3
Na22-B2	VC20110	-0.19037	3	NA22	M3.10K.R02.E02B	M3
Na22-B3	VC20110	-0.330933	4	NA22	M3.10K.R03.E02B	M3
Na22-B4	VC20110	-0.330702	5	NA22	M3.10K.R04.E02B	M3
Na22-B7	VC20110	-0.250142	8	NA22	M3.10K.R07.E02B	M3
Na22-B8	VC20110	-0.238149	10	NA22	M3.10K.R08.E02B	M3
HT115-01	VC20111	-0.267588	1	HT115	M10.R01.E02	M10
HT115-02	VC20111	-0.378936	2	HT115	M10.R02.E02	M10
HT115-03	VC20111	-0.100912	3	HT115	M10.R03.E02	M10
HT115-04	VC20111	-0.0709954	4	HT115	M10.R04.E02	M10
HT115-05	VC20111	-0.00686534	5	HT115	M10.R05.E02	M10
HT115-06	VC20111	-0.268488	6	HT115	M10.R06.E02	M10
HT115-07	VC20111	-0.107736	7	HT115	M10.R07.E02	M10
HT115-08	VC20111	-0.0720606	8	HT115	M10.R08.E02	M10
HT115-09	VC20111	-0.0115025	9	HT115	M10.R09.E02	M10
HT115-10	VC20111	-0.14375	10	HT115	M10.R10.E02	M10
Na22-01	VC20111	-0.190168	17	NA22	M10.R17.E02	M10
Na22-02	VC20111	-0.203672	18	NA22	M10.R18.E02	M10
Na22-03	VC20111	-0.104519	19	NA22	M10.R19.E02	M10
Na22-04	VC20111	-0.0586172	20	NA22	M10.R20.E02	M10
Na22-05	VC20111	-0.041142	21	NA22	M10.R21.E02	M10
Na22-06	VC20111	0.124035	22	NA22	M10.R22.E02	M10
Na22-07	VC20111	0.336557	23	NA22	M10.R23.E02	M10
Na22-08	VC20111	0.15023	24	NA22	M10.R24.E02	M10
OP50-01	VC20111	-0.424923	11	OP50	M10.R11.E02	M10
OP50-02	VC20111	-0.218388	12	OP50	M10.R12.E02	M10
OP50-03	VC20111	-0.0253098	13	OP50	M10.R13.E02	M10
OP50-04	VC20111	0.0159947	14	OP50	M10.R14.E02	M10
OP50-05	VC20111	0.154175	15	OP50	M10.R15.E02	M10
OP50-06	VC20111	-0.0547242	16	OP50	M10.R16.E02	M10
HT115-01	VC20123	-0.335188	1	HT115	M11.R01.E02	M11
HT115-02	VC20123	-0.0948185	2	HT115	M11.R02.E02	M11
HT115-03	VC20123	-0.178238	3	HT115	M11.R03.E02	M11
HT115-04	VC20123	-0.421697	4	HT115	M11.R04.E02	M11
HT115-05	VC20123	-0.240942	5	HT115	M11.R05.E02	M11
HT115.liquid-01	VC20123	-0.0989304	6	HT115	M11.R06.E02	M11
HT115.liquid-02	VC20123	-0.0368347	7	HT115	M11.R07.E02	M11
HT115.liquid-03	VC20123	0.0800283	8	HT115	M11.R08.E02	M11
HT115.liquid-04	VC20123	-0.191601	9	HT115	M11.R09.E02	M11
HT115.liquid-05	VC20123	-0.0800031	10	HT115	M11.R10.E02	M11
Na22-01	VC20123	-0.51452	17	NA22	M11.R17.E02	M11
Na22-02	VC20123	-0.634227	18	NA22	M11.R18.E02	M11
Na22-03	VC20123	-0.561144	19	NA22	M11.R19.E02	M11
Na22-04	VC20123	-0.549355	20	NA22	M11.R20.E02	M11
Na22.liquid-01	VC20123	-0.420514	21	NA22	M11.R21.E02	M11
Na22.liquid-02	VC20123	-0.483229	22	NA22	M11.R22.E02	M11
Na22.liquid-03	VC20123	-0.300874	23	NA22	M11.R23.E02	M11
Na22.liquid-04	VC20123	-0.369227	24	NA22	M11.R24.E02	M11
OP50-01	VC20123	-0.634148	11	OP50	M11.R11.E02	M11
OP50-02	VC20123	-0.420931	12	OP50	M11.R12.E02	M11
OP50-03	VC20123	-0.247189	13	OP50	M11.R13.E02	M11
OP50-04	VC20123	-0.314178	14	OP50	M11.R14.E02	M11
OP50-05	VC20123	-0.548719	15	OP50	M11.R15.E02	M11
OP50-06	VC20123	-0.668723	16	OP50	M11.R16.E02	M11
ceh-18	VC20125	-0.396547	51	HT115	M05.R51.E02	M5
ceh-2	VC20125	-0.536945	1	HT115	M05.R01.E02	M5
dpy-11	VC20125	-0.402709	74	HT115	M05.RC2.E02	M5
hbl-1	VC20125	-0.402709	52	HT115	M05.R52.E02	M5
HT115	VC20125	-0.536945	73	HT115	M05.RC1.E02	M5
nhr-23	VC20125	-0.402709	2	HT115	M05.R02.E02	M5
pqn-21	VC20125	-0.373103	3	HT115	M05.R03.E02	M5
somi-1	VC20125	-0.536945	47	HT115	M05.R47.E02	M5
unc-22	VC20125	-0.402709	75	HT115	M05.RC3.E02	M5
unc-39	VC20125	-0.402709	48	HT115	M05.R48.E02	M5
HT115-01	VC20125	-1.37703	1	HT115	M07.R01.E03	M7
HT115-03	VC20125	-1.05121	3	HT115	M07.R03.E03	M7
HT115-04	VC20125	-0.883655	4	HT115	M07.R04.E03	M7
HT115-05	VC20125	-0.584876	5	HT115	M07.R05.E03	M7
HT115-06	VC20125	-0.409332	6	HT115	M07.R06.E03	M7
HT115-07	VC20125	-0.875386	7	HT115	M07.R07.E03	M7
HT115-08	VC20125	-0.630824	8	HT115	M07.R08.E03	M7
HT115-09	VC20125	-1.11312	9	HT115	M07.R09.E03	M7
HT115-10	VC20125	-0.888715	10	HT115	M07.R10.E03	M7
HT115-01	VC20125	-1.02323	1	HT115	M08.R01.E03	M8
HT115-02	VC20125	-0.896383	2	HT115	M08.R02.E03	M8
HT115-03	VC20125	-0.778783	3	HT115	M08.R03.E03	M8
HT115-04	VC20125	-0.876056	4	HT115	M08.R04.E03	M8
HT115-05	VC20125	-0.785612	5	HT115	M08.R05.E03	M8
HT115-06	VC20125	-1.31083	6	HT115	M08.R06.E03	M8
HT115-07	VC20125	-0.488676	7	HT115	M08.R07.E03	M8
HT115-08	VC20125	-1.02315	8	HT115	M08.R08.E03	M8
HT115-09	VC20125	-0.511562	9	HT115	M08.R09.E03	M8
HT115-10	VC20125	-1.1637	10	HT115	M08.R10.E03	M8
HT115-01	VC20126	-0.26211	1	HT115	M11.R01.E02	M11
HT115-02	VC20126	-0.234321	2	HT115	M11.R02.E02	M11
HT115-03	VC20126	-0.402157	3	HT115	M11.R03.E02	M11
HT115-04	VC20126	-3.95164e-05	4	HT115	M11.R04.E02	M11
HT115-05	VC20126	-0.343235	5	HT115	M11.R05.E02	M11
HT115.liquid-01	VC20126	0.112371	6	HT115	M11.R06.E02	M11
HT115.liquid-02	VC20126	0.0386937	7	HT115	M11.R07.E02	M11
HT115.liquid-03	VC20126	0.133408	8	HT115	M11.R08.E02	M11
HT115.liquid-04	VC20126	0.0807751	9	HT115	M11.R09.E02	M11
HT115.liquid-05	VC20126	0.0985863	10	HT115	M11.R10.E02	M11
Na22-01	VC20126	-0.120457	17	NA22	M11.R17.E02	M11
Na22-02	VC20126	-0.184218	18	NA22	M11.R18.E02	M11
Na22-03	VC20126	-0.186376	19	NA22	M11.R19.E02	M11
Na22-04	VC20126	-0.25124	20	NA22	M11.R20.E02	M11
Na22.liquid-01	VC20126	-0.0781695	21	NA22	M11.R21.E02	M11
Na22.liquid-02	VC20126	-0.212953	22	NA22	M11.R22.E02	M11
Na22.liquid-03	VC20126	-0.298759	23	NA22	M11.R23.E02	M11
Na22.liquid-04	VC20126	-0.398795	24	NA22	M11.R24.E02	M11
OP50-01	VC20126	-0.0845836	11	OP50	M11.R11.E02	M11
OP50-02	VC20126	-0.00744391	12	OP50	M11.R12.E02	M11
OP50-03	VC20126	-0.582676	13	OP50	M11.R13.E02	M11
OP50-04	VC20126	-0.51638	14	OP50	M11.R14.E02	M11
OP50-05	VC20126	-0.213492	15	OP50	M11.R15.E02	M11
OP50-06	VC20126	-0.438542	16	OP50	M11.R16.E02	M11
HT115-01	VC20127	0.492569	1	HT115	M10.R01.E02	M10
HT115-02	VC20127	0.487355	2	HT115	M10.R02.E02	M10
HT115-03	VC20127	0.492698	3	HT115	M10.R03.E02	M10
HT115-04	VC20127	0.428268	4	HT115	M10.R04.E02	M10
HT115-05	VC20127	0.458554	5	HT115	M10.R05.E02	M10
HT115-06	VC20127	0.420451	6	HT115	M10.R06.E02	M10
HT115-07	VC20127	0.295514	7	HT115	M10.R07.E02	M10
HT115-08	VC20127	0.54284	8	HT115	M10.R08.E02	M10
HT115-09	VC20127	0.175306	9	HT115	M10.R09.E02	M10
HT115-10	VC20127	0.182298	10	HT115	M10.R10.E02	M10
Na22-01	VC20127	0.212881	17	NA22	M10.R17.E02	M10
Na22-02	VC20127	0.385358	18	NA22	M10.R18.E02	M10
Na22-03	VC20127	0.306417	19	NA22	M10.R19.E02	M10
Na22-04	VC20127	0.240442	20	NA22	M10.R20.E02	M10
Na22-05	VC20127	0.268429	21	NA22	M10.R21.E02	M10
Na22-06	VC20127	0.15181	22	NA22	M10.R22.E02	M10
Na22-07	VC20127	0.0448516	23	NA22	M10.R23.E02	M10
Na22-08	VC20127	0.0176227	24	NA22	M10.R24.E02	M10
OP50-01	VC20127	0.381137	11	OP50	M10.R11.E02	M10
OP50-02	VC20127	0.489184	12	OP50	M10.R12.E02	M10
OP50-03	VC20127	0.330231	13	OP50	M10.R13.E02	M10
OP50-04	VC20127	0.369529	14	OP50	M10.R14.E02	M10
OP50-05	VC20127	0.29326	15	OP50	M10.R15.E02	M10
OP50-06	VC20127	0.216868	16	OP50	M10.R16.E02	M10
HT115-01	VC20128	-0.15481	1	HT115	M10.R01.E02	M10
HT115-02	VC20128	-0.0520857	2	HT115	M10.R02.E02	M10
HT115-03	VC20128	-0.0287811	3	HT115	M10.R03.E02	M10
HT115-04	VC20128	0.0486388	4	HT115	M10.R04.E02	M10
HT115-05	VC20128	-0.0116178	5	HT115	M10.R05.E02	M10
HT115-06	VC20128	0.102657	6	HT115	M10.R06.E02	M10
HT115-07	VC20128	0.22991	7	HT115	M10.R07.E02	M10
HT115-08	VC20128	0.0142977	8	HT115	M10.R08.E02	M10
HT115-09	VC20128	0.129576	9	HT115	M10.R09.E02	M10
HT115-10	VC20128	0.0835488	10	HT115	M10.R10.E02	M10
Na22-01	VC20128	-0.175321	17	NA22	M10.R17.E02	M10
Na22-02	VC20128	-0.385629	18	NA22	M10.R18.E02	M10
Na22-03	VC20128	-0.488138	19	NA22	M10.R19.E02	M10
Na22-04	VC20128	-0.373271	20	NA22	M10.R20.E02	M10
Na22-05	VC20128	-0.480681	21	NA22	M10.R21.E02	M10
Na22-06	VC20128	-0.486939	22	NA22	M10.R22.E02	M10
Na22-07	VC20128	-0.458219	23	NA22	M10.R23.E02	M10
Na22-08	VC20128	-0.44311	24	NA22	M10.R24.E02	M10
OP50-01	VC20128	0.297958	11	OP50	M10.R11.E02	M10
OP50-02	VC20128	0.0913708	12	OP50	M10.R12.E02	M10
OP50-03	VC20128	0.154788	13	OP50	M10.R13.E02	M10
OP50-04	VC20128	0.14926	14	OP50	M10.R14.E02	M10
OP50-05	VC20128	0.190104	15	OP50	M10.R15.E02	M10
OP50-06	VC20128	-0.0408398	16	OP50	M10.R16.E02	M10
HT115-01	VC20131	-0.352784	1	HT115	M10.R01.E02	M10
HT115-02	VC20131	-0.60558	2	HT115	M10.R02.E02	M10
HT115-03	VC20131	-0.407465	3	HT115	M10.R03.E02	M10
HT115-04	VC20131	-0.286704	4	HT115	M10.R04.E02	M10
HT115-05	VC20131	-0.407727	5	HT115	M10.R05.E02	M10
HT115-06	VC20131	-0.194034	6	HT115	M10.R06.E02	M10
HT115-07	VC20131	-0.327701	7	HT115	M10.R07.E02	M10
HT115-08	VC20131	-0.217138	8	HT115	M10.R08.E02	M10
HT115-09	VC20131	-0.461492	9	HT115	M10.R09.E02	M10
HT115-10	VC20131	-0.143271	10	HT115	M10.R10.E02	M10
Na22-01	VC20131	-0.043873	17	NA22	M10.R17.E02	M10
Na22-02	VC20131	0.11278	18	NA22	M10.R18.E02	M10
Na22-03	VC20131	0.0395015	19	NA22	M10.R19.E02	M10
Na22-04	VC20131	0.090794	20	NA22	M10.R20.E02	M10
Na22-05	VC20131	0.0911672	21	NA22	M10.R21.E02	M10
Na22-06	VC20131	0.0350619	22	NA22	M10.R22.E02	M10
Na22-07	VC20131	-0.198563	23	NA22	M10.R23.E02	M10
Na22-08	VC20131	0.0752777	24	NA22	M10.R24.E02	M10
OP50-01	VC20131	-0.152593	11	OP50	M10.R11.E02	M10
OP50-02	VC20131	-0.0800988	12	OP50	M10.R12.E02	M10
OP50-03	VC20131	-0.0665902	13	OP50	M10.R13.E02	M10
OP50-04	VC20131	0.117228	14	OP50	M10.R14.E02	M10
OP50-05	VC20131	-0.232372	15	OP50	M10.R15.E02	M10
OP50-06	VC20131	-0.0869291	16	OP50	M10.R16.E02	M10
HT115-01	VC20133	0.123355	1	HT115	M10.R01.E02	M10
HT115-02	VC20133	-0.265179	2	HT115	M10.R02.E02	M10
HT115-03	VC20133	-0.176148	3	HT115	M10.R03.E02	M10
HT115-04	VC20133	-0.159823	4	HT115	M10.R04.E02	M10
HT115-05	VC20133	-0.187482	5	HT115	M10.R05.E02	M10
HT115-06	VC20133	-0.150558	6	HT115	M10.R06.E02	M10
HT115-07	VC20133	-0.249987	7	HT115	M10.R07.E02	M10
HT115-08	VC20133	-0.0490558	8	HT115	M10.R08.E02	M10
HT115-09	VC20133	-0.28897	9	HT115	M10.R09.E02	M10
HT115-10	VC20133	-0.0344842	10	HT115	M10.R10.E02	M10
Na22-01	VC20133	0.4265	17	NA22	M10.R17.E02	M10
Na22-02	VC20133	0.443007	18	NA22	M10.R18.E02	M10
Na22-03	VC20133	0.428552	19	NA22	M10.R19.E02	M10
Na22-04	VC20133	0.452036	20	NA22	M10.R20.E02	M10
Na22-05	VC20133	0.473787	21	NA22	M10.R21.E02	M10
Na22-06	VC20133	0.446707	22	NA22	M10.R22.E02	M10
Na22-07	VC20133	0.26923	23	NA22	M10.R23.E02	M10
Na22-08	VC20133	0.384254	24	NA22	M10.R24.E02	M10
OP50-01	VC20133	0.0390496	11	OP50	M10.R11.E02	M10
OP50-02	VC20133	0.0937121	12	OP50	M10.R12.E02	M10
OP50-03	VC20133	0.151367	13	OP50	M10.R13.E02	M10
OP50-04	VC20133	0.307393	14	OP50	M10.R14.E02	M10
OP50-05	VC20133	0.190057	15	OP50	M10.R15.E02	M10
OP50-06	VC20133	0.463186	16	OP50	M10.R16.E02	M10
HT115-01	VC20135	-0.457892	1	HT115	M11.R01.E02	M11
HT115-02	VC20135	-0.4046	2	HT115	M11.R02.E02	M11
HT115-03	VC20135	-0.530248	3	HT115	M11.R03.E02	M11
HT115-04	VC20135	-0.304482	4	HT115	M11.R04.E02	M11
HT115-05	VC20135	-0.318646	5	HT115	M11.R05.E02	M11
HT115.liquid-01	VC20135	-0.181901	6	HT115	M11.R06.E02	M11
HT115.liquid-02	VC20135	-0.463439	7	HT115	M11.R07.E02	M11
HT115.liquid-03	VC20135	-0.303537	8	HT115	M11.R08.E02	M11
HT115.liquid-04	VC20135	-0.315353	9	HT115	M11.R09.E02	M11
HT115.liquid-05	VC20135	-0.344279	10	HT115	M11.R10.E02	M11
Na22-01	VC20135	0.0807718	17	NA22	M11.R17.E02	M11
Na22-02	VC20135	0.17929	18	NA22	M11.R18.E02	M11
Na22-03	VC20135	0.195653	19	NA22	M11.R19.E02	M11
Na22-04	VC20135	0.095524	20	NA22	M11.R20.E02	M11
Na22.liquid-01	VC20135	-0.137615	21	NA22	M11.R21.E02	M11
Na22.liquid-02	VC20135	-0.0703645	22	NA22	M11.R22.E02	M11
Na22.liquid-03	VC20135	-0.0228361	23	NA22	M11.R23.E02	M11
Na22.liquid-04	VC20135	-0.041758	24	NA22	M11.R24.E02	M11
OP50-01	VC20135	0.155593	11	OP50	M11.R11.E02	M11
OP50-02	VC20135	0.0613325	12	OP50	M11.R12.E02	M11
OP50-03	VC20135	-0.315996	13	OP50	M11.R13.E02	M11
OP50-04	VC20135	-0.671202	14	OP50	M11.R14.E02	M11
OP50-05	VC20135	-0.231439	15	OP50	M11.R15.E02	M11
OP50-06	VC20135	-0.275202	16	OP50	M11.R16.E02	M11
Na22-A1	VC20136	-0.219705	1	NA22	M1.R01.E05A.R01.E02	M1
Na22-A2	VC20136	-0.388606	2	NA22	M1.R01.E05A.R02.E02	M1
Na22-A3	VC20136	-0.196554	3	NA22	M1.R01.E05A.R03.E02	M1
Na22-A4	VC20136	-0.365747	4	NA22	M1.R01.E05A.R04.E02	M1
Na22-B5	VC20136	-0.267358	5	NA22	M1.R01.E05B.R01.E02	M1
Na22-B6	VC20136	-0.149486	6	NA22	M1.R01.E05B.R02.E02	M1
Na22-B7	VC20136	-0.376582	7	NA22	M1.R01.E05B.R03.E02	M1
Na22-B8	VC20136	-0.255696	8	NA22	M1.R01.E05B.R04.E02	M1
Na22-A2	VC20136	-0.169794	2	NA22	M3.10K.R02.E02A	M3
Na22-A5	VC20136	-0.298449	6	NA22	M3.10K.R05.E02A	M3
Na22-A7	VC20136	-0.170284	7	NA22	M3.10K.R07.E02A	M3
Na22-A8	VC20136	-0.0798629	9	NA22	M3.10K.R08.E02A	M3
Na22-B1	VC20136	-0.276524	1	NA22	M3.10K.R01.E02B	M3
Na22-B2	VC20136	-0.158356	3	NA22	M3.10K.R02.E02B	M3
Na22-B3	VC20136	-0.294767	4	NA22	M3.10K.R03.E02B	M3
Na22-B4	VC20136	-0.330826	5	NA22	M3.10K.R04.E02B	M3
Na22-B7	VC20136	-0.100186	8	NA22	M3.10K.R07.E02B	M3
Na22-B8	VC20136	-0.0413449	10	NA22	M3.10K.R08.E02B	M3
HT115-01	VC20137	-0.429045	1	HT115	M10.R01.E02	M10
HT115-02	VC20137	-0.591876	2	HT115	M10.R02.E02	M10
HT115-03	VC20137	-0.662653	3	HT115	M10.R03.E02	M10
HT115-04	VC20137	-0.595854	4	HT115	M10.R04.E02	M10
HT115-05	VC20137	-0.472075	5	HT115	M10.R05.E02	M10
HT115-06	VC20137	-0.696754	6	HT115	M10.R06.E02	M10
HT115-07	VC20137	-0.459172	7	HT115	M10.R07.E02	M10
HT115-08	VC20137	-0.445995	8	HT115	M10.R08.E02	M10
HT115-09	VC20137	-0.462855	9	HT115	M10.R09.E02	M10
HT115-10	VC20137	-0.465744	10	HT115	M10.R10.E02	M10
Na22-01	VC20137	-0.582741	17	NA22	M10.R17.E02	M10
Na22-02	VC20137	-0.607308	18	NA22	M10.R18.E02	M10
Na22-03	VC20137	-0.667254	19	NA22	M10.R19.E02	M10
Na22-04	VC20137	-0.460378	20	NA22	M10.R20.E02	M10
Na22-05	VC20137	-0.324874	21	NA22	M10.R21.E02	M10
Na22-06	VC20137	-0.477807	22	NA22	M10.R22.E02	M10
Na22-07	VC20137	-0.164885	23	NA22	M10.R23.E02	M10
Na22-08	VC20137	-0.192658	24	NA22	M10.R24.E02	M10
OP50-01	VC20137	-0.798307	11	OP50	M10.R11.E02	M10
OP50-02	VC20137	-0.726493	12	OP50	M10.R12.E02	M10
OP50-03	VC20137	-0.385629	13	OP50	M10.R13.E02	M10
OP50-04	VC20137	-0.430533	14	OP50	M10.R14.E02	M10
OP50-05	VC20137	-0.228854	15	OP50	M10.R15.E02	M10
OP50-06	VC20137	-0.221365	16	OP50	M10.R16.E02	M10
HT115-01	VC20140	-0.333852	1	HT115	M10.R01.E02	M10
HT115-02	VC20140	-0.572351	2	HT115	M10.R02.E02	M10
HT115-03	VC20140	-0.192701	3	HT115	M10.R03.E02	M10
HT115-04	VC20140	-0.202713	4	HT115	M10.R04.E02	M10
HT115-05	VC20140	-0.245142	5	HT115	M10.R05.E02	M10
HT115-06	VC20140	-0.247523	6	HT115	M10.R06.E02	M10
HT115-07	VC20140	-0.10806	7	HT115	M10.R07.E02	M10
HT115-08	VC20140	-0.15855	8	HT115	M10.R08.E02	M10
HT115-09	VC20140	-0.224446	9	HT115	M10.R09.E02	M10
HT115-10	VC20140	-0.242525	10	HT115	M10.R10.E02	M10
Na22-01	VC20140	-0.271699	17	NA22	M10.R17.E02	M10
Na22-02	VC20140	-0.361028	18	NA22	M10.R18.E02	M10
Na22-03	VC20140	-0.126495	19	NA22	M10.R19.E02	M10
Na22-04	VC20140	-0.168016	20	NA22	M10.R20.E02	M10
Na22-05	VC20140	-0.0794653	21	NA22	M10.R21.E02	M10
Na22-06	VC20140	-0.0829466	22	NA22	M10.R22.E02	M10
Na22-07	VC20140	0.129264	23	NA22	M10.R23.E02	M10
Na22-08	VC20140	-0.18104	24	NA22	M10.R24.E02	M10
OP50-01	VC20140	-0.615806	11	OP50	M10.R11.E02	M10
OP50-02	VC20140	-0.365366	12	OP50	M10.R12.E02	M10
OP50-03	VC20140	-0.346945	13	OP50	M10.R13.E02	M10
OP50-04	VC20140	-0.35436	14	OP50	M10.R14.E02	M10
OP50-05	VC20140	0.00637544	15	OP50	M10.R15.E02	M10
OP50-06	VC20140	-0.0747988	16	OP50	M10.R16.E02	M10
HT115-01	VC20142	-1.30668	1	HT115	M11.R01.E02	M11
HT115-02	VC20142	-1.60267	2	HT115	M11.R02.E02	M11
HT115-03	VC20142	-1.5269	3	HT115	M11.R03.E02	M11
HT115-04	VC20142	-0.953453	4	HT115	M11.R04.E02	M11
HT115-05	VC20142	-0.884359	5	HT115	M11.R05.E02	M11
HT115.liquid-01	VC20142	-0.951656	6	HT115	M11.R06.E02	M11
HT115.liquid-02	VC20142	-0.739495	7	HT115	M11.R07.E02	M11
HT115.liquid-03	VC20142	-0.552588	8	HT115	M11.R08.E02	M11
HT115.liquid-04	VC20142	-0.737443	9	HT115	M11.R09.E02	M11
HT115.liquid-05	VC20142	-0.576195	10	HT115	M11.R10.E02	M11
Na22-01	VC20142	-0.8674	17	NA22	M11.R17.E02	M11
Na22-02	VC20142	-1.31117	18	NA22	M11.R18.E02	M11
Na22-03	VC20142	-1.06728	19	NA22	M11.R19.E02	M11
Na22-04	VC20142	-0.955534	20	NA22	M11.R20.E02	M11
Na22.liquid-01	VC20142	-0.435259	21	NA22	M11.R21.E02	M11
Na22.liquid-02	VC20142	-0.659409	22	NA22	M11.R22.E02	M11
Na22.liquid-03	VC20142	-0.64816	23	NA22	M11.R23.E02	M11
Na22.liquid-04	VC20142	-0.529199	24	NA22	M11.R24.E02	M11
OP50-01	VC20142	-1.33733	11	OP50	M11.R11.E02	M11
OP50-02	VC20142	-0.895905	12	OP50	M11.R12.E02	M11
OP50-03	VC20142	-1.02762	13	OP50	M11.R13.E02	M11
OP50-04	VC20142	-1.4511	14	OP50	M11.R14.E02	M11
OP50-05	VC20142	-0.831604	15	OP50	M11.R15.E02	M11
OP50-06	VC20142	-0.719788	16	OP50	M11.R16.E02	M11
HT115-01	VC20145	0.332748	1	HT115	M10.R01.E02	M10
HT115-02	VC20145	0.476732	2	HT115	M10.R02.E02	M10
HT115-03	VC20145	0.444604	3	HT115	M10.R03.E02	M10
HT115-04	VC20145	0.565456	4	HT115	M10.R04.E02	M10
HT115-05	VC20145	0.615928	5	HT115	M10.R05.E02	M10
HT115-06	VC20145	0.480686	6	HT115	M10.R06.E02	M10
HT115-07	VC20145	0.443892	7	HT115	M10.R07.E02	M10
HT115-08	VC20145	0.356922	8	HT115	M10.R08.E02	M10
HT115-09	VC20145	0.555843	9	HT115	M10.R09.E02	M10
HT115-10	VC20145	0.409347	10	HT115	M10.R10.E02	M10
Na22-01	VC20145	0.454745	17	NA22	M10.R17.E02	M10
Na22-02	VC20145	0.241449	18	NA22	M10.R18.E02	M10
Na22-03	VC20145	0.364541	19	NA22	M10.R19.E02	M10
Na22-04	VC20145	0.159097	20	NA22	M10.R20.E02	M10
Na22-05	VC20145	-0.0452872	21	NA22	M10.R21.E02	M10
Na22-06	VC20145	-0.0207034	22	NA22	M10.R22.E02	M10
Na22-07	VC20145	-0.206374	23	NA22	M10.R23.E02	M10
Na22-08	VC20145	0.101249	24	NA22	M10.R24.E02	M10
OP50-01	VC20145	0.398053	11	OP50	M10.R11.E02	M10
OP50-02	VC20145	0.24321	12	OP50	M10.R12.E02	M10
OP50-03	VC20145	0.161877	13	OP50	M10.R13.E02	M10
OP50-04	VC20145	-0.0144495	14	OP50	M10.R14.E02	M10
OP50-05	VC20145	-0.107163	15	OP50	M10.R15.E02	M10
OP50-06	VC20145	-0.146988	16	OP50	M10.R16.E02	M10
HT115-01	VC20146	-0.663952	1	HT115	M10.R01.E02	M10
HT115-02	VC20146	-0.526293	2	HT115	M10.R02.E02	M10
HT115-03	VC20146	-0.395054	3	HT115	M10.R03.E02	M10
HT115-04	VC20146	-0.363789	4	HT115	M10.R04.E02	M10
HT115-05	VC20146	-0.760741	5	HT115	M10.R05.E02	M10
HT115-06	VC20146	-0.382959	6	HT115	M10.R06.E02	M10
HT115-07	VC20146	-0.634899	7	HT115	M10.R07.E02	M10
HT115-08	VC20146	-0.429351	8	HT115	M10.R08.E02	M10
HT115-09	VC20146	-0.513955	9	HT115	M10.R09.E02	M10
HT115-10	VC20146	-0.522894	10	HT115	M10.R10.E02	M10
Na22-01	VC20146	-0.392782	17	NA22	M10.R17.E02	M10
Na22-02	VC20146	-0.413921	18	NA22	M10.R18.E02	M10
Na22-03	VC20146	-0.430499	19	NA22	M10.R19.E02	M10
Na22-04	VC20146	-0.679283	20	NA22	M10.R20.E02	M10
Na22-05	VC20146	-0.333881	21	NA22	M10.R21.E02	M10
Na22-06	VC20146	-0.295334	22	NA22	M10.R22.E02	M10
Na22-07	VC20146	-0.149638	23	NA22	M10.R23.E02	M10
Na22-08	VC20146	-0.282983	24	NA22	M10.R24.E02	M10
OP50-01	VC20146	-0.579753	11	OP50	M10.R11.E02	M10
OP50-02	VC20146	-0.558621	12	OP50	M10.R12.E02	M10
OP50-03	VC20146	-0.43624	13	OP50	M10.R13.E02	M10
OP50-04	VC20146	-0.369987	14	OP50	M10.R14.E02	M10
OP50-05	VC20146	-0.440853	15	OP50	M10.R15.E02	M10
OP50-06	VC20146	-0.795238	16	OP50	M10.R16.E02	M10
HT115-01	VC20147	-0.191359	1	HT115	M10.R01.E02	M10
HT115-02	VC20147	-0.261891	2	HT115	M10.R02.E02	M10
HT115-03	VC20147	-0.239876	3	HT115	M10.R03.E02	M10
HT115-04	VC20147	-0.440327	4	HT115	M10.R04.E02	M10
HT115-05	VC20147	-0.417932	5	HT115	M10.R05.E02	M10
HT115-06	VC20147	-0.27885	6	HT115	M10.R06.E02	M10
HT115-07	VC20147	-0.263331	7	HT115	M10.R07.E02	M10
HT115-08	VC20147	-0.362824	8	HT115	M10.R08.E02	M10
HT115-09	VC20147	-0.345295	9	HT115	M10.R09.E02	M10
HT115-10	VC20147	-0.327925	10	HT115	M10.R10.E02	M10
Na22-01	VC20147	-0.200039	17	NA22	M10.R17.E02	M10
Na22-02	VC20147	-0.588381	18	NA22	M10.R18.E02	M10
Na22-03	VC20147	-0.420491	19	NA22	M10.R19.E02	M10
Na22-04	VC20147	-0.268259	20	NA22	M10.R20.E02	M10
Na22-05	VC20147	-0.204256	21	NA22	M10.R21.E02	M10
Na22-06	VC20147	-0.237037	22	NA22	M10.R22.E02	M10
Na22-07	VC20147	0.246754	23	NA22	M10.R23.E02	M10
Na22-08	VC20147	-0.0510872	24	NA22	M10.R24.E02	M10
OP50-01	VC20147	-0.569271	11	OP50	M10.R11.E02	M10
OP50-02	VC20147	-0.134696	12	OP50	M10.R12.E02	M10
OP50-03	VC20147	-0.0507468	13	OP50	M10.R13.E02	M10
OP50-04	VC20147	-0.239611	14	OP50	M10.R14.E02	M10
OP50-05	VC20147	0.089564	15	OP50	M10.R15.E02	M10
OP50-06	VC20147	0.199244	16	OP50	M10.R16.E02	M10
HT115-01	VC20150	-0.180654	1	HT115	M10.R01.E02	M10
HT115-02	VC20150	-0.450786	2	HT115	M10.R02.E02	M10
HT115-03	VC20150	-0.370135	3	HT115	M10.R03.E02	M10
HT115-04	VC20150	-0.297954	4	HT115	M10.R04.E02	M10
HT115-05	VC20150	-0.321779	5	HT115	M10.R05.E02	M10
HT115-06	VC20150	-0.263314	6	HT115	M10.R06.E02	M10
HT115-07	VC20150	-0.277238	7	HT115	M10.R07.E02	M10
HT115-08	VC20150	-0.448949	8	HT115	M10.R08.E02	M10
HT115-09	VC20150	-0.380706	9	HT115	M10.R09.E02	M10
HT115-10	VC20150	-0.40129	10	HT115	M10.R10.E02	M10
Na22-01	VC20150	-0.472991	17	NA22	M10.R17.E02	M10
Na22-02	VC20150	-0.445883	18	NA22	M10.R18.E02	M10
Na22-03	VC20150	-0.512476	19	NA22	M10.R19.E02	M10
Na22-04	VC20150	-0.29993	20	NA22	M10.R20.E02	M10
Na22-05	VC20150	-0.209712	21	NA22	M10.R21.E02	M10
Na22-06	VC20150	-0.115844	22	NA22	M10.R22.E02	M10
Na22-07	VC20150	-0.0156846	23	NA22	M10.R23.E02	M10
Na22-08	VC20150	-0.0641854	24	NA22	M10.R24.E02	M10
OP50-01	VC20150	-0.674673	11	OP50	M10.R11.E02	M10
OP50-02	VC20150	-0.636013	12	OP50	M10.R12.E02	M10
OP50-03	VC20150	-0.45375	13	OP50	M10.R13.E02	M10
OP50-04	VC20150	-0.435789	14	OP50	M10.R14.E02	M10
OP50-05	VC20150	-0.245408	15	OP50	M10.R15.E02	M10
OP50-06	VC20150	-0.201017	16	OP50	M10.R16.E02	M10
HT115-01	VC20151	-0.340401	1	HT115	M10.R01.E02	M10
HT115-02	VC20151	-0.476356	2	HT115	M10.R02.E02	M10
HT115-03	VC20151	-0.497013	3	HT115	M10.R03.E02	M10
HT115-04	VC20151	-0.339278	4	HT115	M10.R04.E02	M10
HT115-05	VC20151	-0.455686	5	HT115	M10.R05.E02	M10
HT115-06	VC20151	-0.262777	6	HT115	M10.R06.E02	M10
HT115-07	VC20151	-0.456832	7	HT115	M10.R07.E02	M10
HT115-08	VC20151	-0.328582	8	HT115	M10.R08.E02	M10
HT115-09	VC20151	-0.359003	9	HT115	M10.R09.E02	M10
HT115-10	VC20151	-0.279204	10	HT115	M10.R10.E02	M10
Na22-01	VC20151	-0.596378	17	NA22	M10.R17.E02	M10
Na22-02	VC20151	-0.399551	18	NA22	M10.R18.E02	M10
Na22-03	VC20151	-0.485911	19	NA22	M10.R19.E02	M10
Na22-04	VC20151	-0.413669	20	NA22	M10.R20.E02	M10
Na22-05	VC20151	-0.113836	21	NA22	M10.R21.E02	M10
Na22-06	VC20151	-0.239472	22	NA22	M10.R22.E02	M10
Na22-07	VC20151	0.0739351	23	NA22	M10.R23.E02	M10
Na22-08	VC20151	-0.141564	24	NA22	M10.R24.E02	M10
OP50-01	VC20151	-0.535541	11	OP50	M10.R11.E02	M10
OP50-02	VC20151	-0.415309	12	OP50	M10.R12.E02	M10
OP50-03	VC20151	-0.34884	13	OP50	M10.R13.E02	M10
OP50-04	VC20151	-0.394209	14	OP50	M10.R14.E02	M10
OP50-05	VC20151	-0.124283	15	OP50	M10.R15.E02	M10
OP50-06	VC20151	-0.14561	16	OP50	M10.R16.E02	M10
NA22	VC20152	0.256998	1	NA22	M1.R01.E05A.R01.E02	M1
Na22-A2	VC20152	0.220628	2	NA22	M1.R01.E05A.R02.E02	M1
Na22-A3	VC20152	0.264791	3	NA22	M1.R01.E05A.R03.E02	M1
Na22-A4	VC20152	0.294712	4	NA22	M1.R01.E05A.R04.E02	M1
Na22-B5	VC20152	0.097451	5	NA22	M1.R01.E05B.R01.E02	M1
Na22-B6	VC20152	0.214234	6	NA22	M1.R01.E05B.R02.E02	M1
Na22-B7	VC20152	0.21048	7	NA22	M1.R01.E05B.R03.E02	M1
Na22-B8	VC20152	0.0277512	8	NA22	M1.R01.E05B.R04.E02	M1
Na22-A2	VC20152	0.199202	2	NA22	M3.10K.R02.E02A	M3
Na22-A5	VC20152	0.201532	6	NA22	M3.10K.R05.E02A	M3
Na22-A7	VC20152	0.249138	7	NA22	M3.10K.R07.E02A	M3
Na22-A8	VC20152	0.126895	9	NA22	M3.10K.R08.E02A	M3
Na22-B1	VC20152	0.239552	1	NA22	M3.10K.R01.E02B	M3
Na22-B2	VC20152	0.206767	3	NA22	M3.10K.R02.E02B	M3
Na22-B3	VC20152	0.181625	4	NA22	M3.10K.R03.E02B	M3
Na22-B4	VC20152	0.233812	5	NA22	M3.10K.R04.E02B	M3
Na22-B7	VC20152	0.158367	8	NA22	M3.10K.R07.E02B	M3
Na22-B8	VC20152	0.126772	10	NA22	M3.10K.R08.E02B	M3
HT115-01	VC20155	0.0255606	1	HT115	M10.R01.E02	M10
HT115-02	VC20155	0.0450262	2	HT115	M10.R02.E02	M10
HT115-03	VC20155	0.0427831	3	HT115	M10.R03.E02	M10
HT115-04	VC20155	0.128196	4	HT115	M10.R04.E02	M10
HT115-05	VC20155	0.144162	5	HT115	M10.R05.E02	M10
HT115-06	VC20155	0.228594	6	HT115	M10.R06.E02	M10
HT115-07	VC20155	0.25507	7	HT115	M10.R07.E02	M10
HT115-08	VC20155	0.203001	8	HT115	M10.R08.E02	M10
HT115-09	VC20155	0.251351	9	HT115	M10.R09.E02	M10
HT115-10	VC20155	0.266831	10	HT115	M10.R10.E02	M10
Na22-01	VC20155	0.123663	17	NA22	M10.R17.E02	M10
Na22-02	VC20155	0.108126	18	NA22	M10.R18.E02	M10
Na22-03	VC20155	0.0556233	19	NA22	M10.R19.E02	M10
Na22-04	VC20155	0.0302791	20	NA22	M10.R20.E02	M10
Na22-05	VC20155	0.075912	21	NA22	M10.R21.E02	M10
Na22-06	VC20155	0.0800614	22	NA22	M10.R22.E02	M10
Na22-07	VC20155	-0.084844	23	NA22	M10.R23.E02	M10
Na22-08	VC20155	0.102755	24	NA22	M10.R24.E02	M10
OP50-01	VC20155	0.125644	11	OP50	M10.R11.E02	M10
OP50-02	VC20155	0.278377	12	OP50	M10.R12.E02	M10
OP50-03	VC20155	0.319759	13	OP50	M10.R13.E02	M10
OP50-04	VC20155	0.277415	14	OP50	M10.R14.E02	M10
OP50-05	VC20155	0.112567	15	OP50	M10.R15.E02	M10
OP50-06	VC20155	-0.0105019	16	OP50	M10.R16.E02	M10
HT115-01	VC20156	-0.527449	1	HT115	M10.R01.E02	M10
HT115-02	VC20156	-0.454605	2	HT115	M10.R02.E02	M10
HT115-03	VC20156	-0.667365	3	HT115	M10.R03.E02	M10
HT115-04	VC20156	-0.489977	4	HT115	M10.R04.E02	M10
HT115-05	VC20156	-0.482615	5	HT115	M10.R05.E02	M10
HT115-06	VC20156	-0.532543	6	HT115	M10.R06.E02	M10
HT115-07	VC20156	-0.512109	7	HT115	M10.R07.E02	M10
HT115-08	VC20156	-0.68252	8	HT115	M10.R08.E02	M10
HT115-09	VC20156	-0.579516	9	HT115	M10.R09.E02	M10
HT115-10	VC20156	-0.712899	10	HT115	M10.R10.E02	M10
Na22-01	VC20156	-0.612509	17	NA22	M10.R17.E02	M10
Na22-02	VC20156	-0.504139	18	NA22	M10.R18.E02	M10
Na22-03	VC20156	-0.585094	19	NA22	M10.R19.E02	M10
Na22-04	VC20156	-0.524925	20	NA22	M10.R20.E02	M10
Na22-05	VC20156	-0.545111	21	NA22	M10.R21.E02	M10
Na22-06	VC20156	-0.595271	22	NA22	M10.R22.E02	M10
Na22-07	VC20156	-0.464974	23	NA22	M10.R23.E02	M10
Na22-08	VC20156	-0.532147	24	NA22	M10.R24.E02	M10
OP50-01	VC20156	-0.244439	11	OP50	M10.R11.E02	M10
OP50-02	VC20156	-0.441885	12	OP50	M10.R12.E02	M10
OP50-03	VC20156	-0.420272	13	OP50	M10.R13.E02	M10
OP50-04	VC20156	-0.450708	14	OP50	M10.R14.E02	M10
OP50-05	VC20156	-0.472601	15	OP50	M10.R15.E02	M10
OP50-06	VC20156	-0.600879	16	OP50	M10.R16.E02	M10
HT115-01	VC20158	-0.521103	1	HT115	M10.R01.E02	M10
HT115-02	VC20158	-0.52037	2	HT115	M10.R02.E02	M10
HT115-03	VC20158	-0.691106	3	HT115	M10.R03.E02	M10
HT115-04	VC20158	-0.51263	4	HT115	M10.R04.E02	M10
HT115-05	VC20158	-0.761128	5	HT115	M10.R05.E02	M10
HT115-06	VC20158	-0.817889	6	HT115	M10.R06.E02	M10
HT115-07	VC20158	-0.491933	7	HT115	M10.R07.E02	M10
HT115-08	VC20158	-0.509749	8	HT115	M10.R08.E02	M10
HT115-09	VC20158	-0.543884	9	HT115	M10.R09.E02	M10
HT115-10	VC20158	-0.575715	10	HT115	M10.R10.E02	M10
Na22-01	VC20158	-0.296777	17	NA22	M10.R17.E02	M10
Na22-02	VC20158	-0.492128	18	NA22	M10.R18.E02	M10
Na22-03	VC20158	-0.553084	19	NA22	M10.R19.E02	M10
Na22-04	VC20158	-0.496792	20	NA22	M10.R20.E02	M10
Na22-05	VC20158	-0.585577	21	NA22	M10.R21.E02	M10
Na22-06	VC20158	-0.766034	22	NA22	M10.R22.E02	M10
Na22-07	VC20158	-0.766095	23	NA22	M10.R23.E02	M10
Na22-08	VC20158	-0.560756	24	NA22	M10.R24.E02	M10
OP50-01	VC20158	-0.534415	11	OP50	M10.R11.E02	M10
OP50-02	VC20158	-0.415973	12	OP50	M10.R12.E02	M10
OP50-03	VC20158	-0.555424	13	OP50	M10.R13.E02	M10
OP50-04	VC20158	-0.530399	14	OP50	M10.R14.E02	M10
OP50-05	VC20158	-0.703159	15	OP50	M10.R15.E02	M10
OP50-06	VC20158	-0.784424	16	OP50	M10.R16.E02	M10
HT115-01	VC20159	-0.310042	1	HT115	M11.R01.E02	M11
HT115-02	VC20159	-0.423016	2	HT115	M11.R02.E02	M11
HT115-03	VC20159	-0.359904	3	HT115	M11.R03.E02	M11
HT115-04	VC20159	-0.398186	4	HT115	M11.R04.E02	M11
HT115-05	VC20159	-0.194613	5	HT115	M11.R05.E02	M11
HT115.liquid-01	VC20159	-0.141626	6	HT115	M11.R06.E02	M11
HT115.liquid-02	VC20159	-0.0943458	7	HT115	M11.R07.E02	M11
HT115.liquid-03	VC20159	-0.222957	8	HT115	M11.R08.E02	M11
HT115.liquid-04	VC20159	-0.407172	9	HT115	M11.R09.E02	M11
HT115.liquid-05	VC20159	-0.269056	10	HT115	M11.R10.E02	M11
Na22-01	VC20159	-0.00798422	17	NA22	M11.R17.E02	M11
Na22-02	VC20159	0.0285075	18	NA22	M11.R18.E02	M11
Na22-03	VC20159	0.0412509	19	NA22	M11.R19.E02	M11
Na22-04	VC20159	-0.0565235	20	NA22	M11.R20.E02	M11
Na22.liquid-01	VC20159	-0.113005	21	NA22	M11.R21.E02	M11
Na22.liquid-02	VC20159	-0.152931	22	NA22	M11.R22.E02	M11
Na22.liquid-03	VC20159	-0.221552	23	NA22	M11.R23.E02	M11
Na22.liquid-04	VC20159	-0.142272	24	NA22	M11.R24.E02	M11
OP50-01	VC20159	0.0254879	11	OP50	M11.R11.E02	M11
OP50-02	VC20159	-0.01026	12	OP50	M11.R12.E02	M11
OP50-03	VC20159	-0.497474	13	OP50	M11.R13.E02	M11
OP50-04	VC20159	-0.635351	14	OP50	M11.R14.E02	M11
OP50-05	VC20159	-0.320087	15	OP50	M11.R15.E02	M11
OP50-06	VC20159	-0.282403	16	OP50	M11.R16.E02	M11
HT115-01	VC20162	-0.704955	1	HT115	M11.R01.E02	M11
HT115-02	VC20162	-0.571253	2	HT115	M11.R02.E02	M11
HT115-03	VC20162	-0.705988	3	HT115	M11.R03.E02	M11
HT115-04	VC20162	-0.508383	4	HT115	M11.R04.E02	M11
HT115-05	VC20162	-0.45607	5	HT115	M11.R05.E02	M11
HT115.liquid-01	VC20162	-0.473548	6	HT115	M11.R06.E02	M11
HT115.liquid-02	VC20162	-0.27636	7	HT115	M11.R07.E02	M11
HT115.liquid-03	VC20162	-0.49291	8	HT115	M11.R08.E02	M11
HT115.liquid-04	VC20162	-0.580568	9	HT115	M11.R09.E02	M11
HT115.liquid-05	VC20162	-0.330203	10	HT115	M11.R10.E02	M11
Na22-01	VC20162	-0.402294	17	NA22	M11.R17.E02	M11
Na22-02	VC20162	-0.455854	18	NA22	M11.R18.E02	M11
Na22-03	VC20162	-0.394512	19	NA22	M11.R19.E02	M11
Na22-04	VC20162	-0.296928	20	NA22	M11.R20.E02	M11
Na22.liquid-01	VC20162	-0.498768	21	NA22	M11.R21.E02	M11
Na22.liquid-02	VC20162	-0.475262	22	NA22	M11.R22.E02	M11
Na22.liquid-03	VC20162	-0.661415	23	NA22	M11.R23.E02	M11
Na22.liquid-04	VC20162	-0.591375	24	NA22	M11.R24.E02	M11
OP50-01	VC20162	-0.43806	11	OP50	M11.R11.E02	M11
OP50-02	VC20162	-0.589496	12	OP50	M11.R12.E02	M11
OP50-03	VC20162	-0.811156	13	OP50	M11.R13.E02	M11
OP50-04	VC20162	-0.784275	14	OP50	M11.R14.E02	M11
OP50-05	VC20162	-0.592678	15	OP50	M11.R15.E02	M11
OP50-06	VC20162	-0.632516	16	OP50	M11.R16.E02	M11
HT115-01	VC20164	-0.396958	1	HT115	M10.R01.E02	M10
HT115-02	VC20164	-0.503254	2	HT115	M10.R02.E02	M10
HT115-03	VC20164	-0.419642	3	HT115	M10.R03.E02	M10
HT115-04	VC20164	-0.447543	4	HT115	M10.R04.E02	M10
HT115-05	VC20164	-0.448335	5	HT115	M10.R05.E02	M10
HT115-06	VC20164	-0.469061	6	HT115	M10.R06.E02	M10
HT115-07	VC20164	-0.406607	7	HT115	M10.R07.E02	M10
HT115-08	VC20164	-0.436932	8	HT115	M10.R08.E02	M10
HT115-09	VC20164	-0.47826	9	HT115	M10.R09.E02	M10
HT115-10	VC20164	-0.456781	10	HT115	M10.R10.E02	M10
Na22-01	VC20164	-0.425554	17	NA22	M10.R17.E02	M10
Na22-02	VC20164	-0.396748	18	NA22	M10.R18.E02	M10
Na22-03	VC20164	-0.551291	19	NA22	M10.R19.E02	M10
Na22-04	VC20164	-0.428719	20	NA22	M10.R20.E02	M10
Na22-05	VC20164	-0.344801	21	NA22	M10.R21.E02	M10
Na22-06	VC20164	-0.381149	22	NA22	M10.R22.E02	M10
Na22-07	VC20164	-0.287343	23	NA22	M10.R23.E02	M10
Na22-08	VC20164	-0.414904	24	NA22	M10.R24.E02	M10
OP50-01	VC20164	-0.48942	11	OP50	M10.R11.E02	M10
OP50-02	VC20164	-0.589469	12	OP50	M10.R12.E02	M10
OP50-03	VC20164	-0.20793	13	OP50	M10.R13.E02	M10
OP50-04	VC20164	-0.579325	14	OP50	M10.R14.E02	M10
OP50-05	VC20164	-0.459618	15	OP50	M10.R15.E02	M10
OP50-06	VC20164	-0.380117	16	OP50	M10.R16.E02	M10
HT115-01	VC20165	-0.278041	1	HT115	M11.R01.E02	M11
HT115-02	VC20165	-0.447159	2	HT115	M11.R02.E02	M11
HT115-03	VC20165	-0.45356	3	HT115	M11.R03.E02	M11
HT115-04	VC20165	-0.32014	4	HT115	M11.R04.E02	M11
HT115-05	VC20165	-0.228753	5	HT115	M11.R05.E02	M11
HT115.liquid-01	VC20165	-0.141881	6	HT115	M11.R06.E02	M11
HT115.liquid-02	VC20165	-0.175903	7	HT115	M11.R07.E02	M11
HT115.liquid-03	VC20165	-0.0214962	8	HT115	M11.R08.E02	M11
HT115.liquid-04	VC20165	-0.260702	9	HT115	M11.R09.E02	M11
HT115.liquid-05	VC20165	-0.127079	10	HT115	M11.R10.E02	M11
Na22-01	VC20165	0.136922	17	NA22	M11.R17.E02	M11
Na22-02	VC20165	0.138794	18	NA22	M11.R18.E02	M11
Na22-03	VC20165	0.190492	19	NA22	M11.R19.E02	M11
Na22-04	VC20165	0.25254	20	NA22	M11.R20.E02	M11
Na22.liquid-01	VC20165	0.0500378	21	NA22	M11.R21.E02	M11
Na22.liquid-02	VC20165	-0.170211	22	NA22	M11.R22.E02	M11
Na22.liquid-03	VC20165	-0.088212	23	NA22	M11.R23.E02	M11
Na22.liquid-04	VC20165	0.0102304	24	NA22	M11.R24.E02	M11
OP50-01	VC20165	0.177342	11	OP50	M11.R11.E02	M11
OP50-02	VC20165	0.110255	12	OP50	M11.R12.E02	M11
OP50-03	VC20165	-0.406375	13	OP50	M11.R13.E02	M11
OP50-04	VC20165	-0.50839	14	OP50	M11.R14.E02	M11
OP50-05	VC20165	-0.0910071	15	OP50	M11.R15.E02	M11
OP50-06	VC20165	-0.0674705	16	OP50	M11.R16.E02	M11
HT115-01	VC20169	0.0204937	1	HT115	M11.R01.E02	M11
HT115-02	VC20169	-0.449282	2	HT115	M11.R02.E02	M11
HT115-03	VC20169	-0.390801	3	HT115	M11.R03.E02	M11
HT115-04	VC20169	-0.0833151	4	HT115	M11.R04.E02	M11
HT115-05	VC20169	-0.163271	5	HT115	M11.R05.E02	M11
HT115.liquid-01	VC20169	-0.248838	6	HT115	M11.R06.E02	M11
HT115.liquid-02	VC20169	-0.265591	7	HT115	M11.R07.E02	M11
HT115.liquid-03	VC20169	-0.320745	8	HT115	M11.R08.E02	M11
HT115.liquid-04	VC20169	-0.339826	9	HT115	M11.R09.E02	M11
HT115.liquid-05	VC20169	-0.254119	10	HT115	M11.R10.E02	M11
Na22-01	VC20169	0.370716	17	NA22	M11.R17.E02	M11
Na22-02	VC20169	0.50835	18	NA22	M11.R18.E02	M11
Na22-03	VC20169	0.485257	19	NA22	M11.R19.E02	M11
Na22-04	VC20169	0.482576	20	NA22	M11.R20.E02	M11
Na22.liquid-01	VC20169	0.0243347	21	NA22	M11.R21.E02	M11
Na22.liquid-02	VC20169	-0.0714441	22	NA22	M11.R22.E02	M11
Na22.liquid-03	VC20169	-0.0388007	23	NA22	M11.R23.E02	M11
Na22.liquid-04	VC20169	0.0547475	24	NA22	M11.R24.E02	M11
OP50-01	VC20169	0.200911	11	OP50	M11.R11.E02	M11
OP50-02	VC20169	0.0806473	12	OP50	M11.R12.E02	M11
OP50-03	VC20169	-0.411894	13	OP50	M11.R13.E02	M11
OP50-04	VC20169	-0.545212	14	OP50	M11.R14.E02	M11
OP50-05	VC20169	-0.0996571	15	OP50	M11.R15.E02	M11
OP50-06	VC20169	-0.525343	16	OP50	M11.R16.E02	M11
Na22-A1	VC20172	-0.195846	1	NA22	M1.R01.E05A.R01.E02	M1
Na22-A2	VC20172	-0.291487	2	NA22	M1.R01.E05A.R02.E02	M1
Na22-A3	VC20172	-0.200818	3	NA22	M1.R01.E05A.R03.E02	M1
Na22-A4	VC20172	-0.110906	4	NA22	M1.R01.E05A.R04.E02	M1
Na22-B5	VC20172	-0.262642	5	NA22	M1.R01.E05B.R01.E02	M1
Na22-B6	VC20172	-0.193569	6	NA22	M1.R01.E05B.R02.E02	M1
Na22-B7	VC20172	-0.34672	7	NA22	M1.R01.E05B.R03.E02	M1
Na22-B8	VC20172	-0.22461	8	NA22	M1.R01.E05B.R04.E02	M1
Na22-A2	VC20172	-0.206373	2	NA22	M3.10K.R02.E02A	M3
Na22-A5	VC20172	-0.290228	6	NA22	M3.10K.R05.E02A	M3
Na22-A7	VC20172	-0.294037	7	NA22	M3.10K.R07.E02A	M3
Na22-A8	VC20172	-0.0319618	9	NA22	M3.10K.R08.E02A	M3
Na22-B1	VC20172	-0.29949	1	NA22	M3.10K.R01.E02B	M3
Na22-B2	VC20172	-0.131578	3	NA22	M3.10K.R02.E02B	M3
Na22-B3	VC20172	-0.420749	4	NA22	M3.10K.R03.E02B	M3
Na22-B4	VC20172	-0.186515	5	NA22	M3.10K.R04.E02B	M3
Na22-B7	VC20172	-0.121033	8	NA22	M3.10K.R07.E02B	M3
Na22-B8	VC20172	-0.023846	10	NA22	M3.10K.R08.E02B	M3
ceh-18	VC20182	-0.359272	51	HT115	M05.R51.E02	M5
ceh-2	VC20182	-0.243366	1	HT115	M05.R01.E02	M5
dpy-11	VC20182	-0.1667	74	HT115	M05.RC2.E02	M5
hbl-1	VC20182	-0.0986081	52	HT115	M05.R52.E02	M5
HT115	VC20182	-0.188803	73	HT115	M05.RC1.E02	M5
nhr-23	VC20182	-0.0837976	2	HT115	M05.R02.E02	M5
pqn-21	VC20182	-0.259477	3	HT115	M05.R03.E02	M5
somi-1	VC20182	0.00853443	47	HT115	M05.R47.E02	M5
unc-22	VC20182	-0.259066	75	HT115	M05.RC3.E02	M5
unc-39	VC20182	-0.0758925	48	HT115	M05.R48.E02	M5
HT115-01	VC20190	-0.968146	1	HT115	M07.R01.E03	M7
HT115-03	VC20190	-1.93629	3	HT115	M07.R03.E03	M7
HT115-04	VC20190	-1.93629	4	HT115	M07.R04.E03	M7
HT115-05	VC20190	-0.968146	5	HT115	M07.R05.E03	M7
HT115-06	VC20190	-0.968146	6	HT115	M07.R06.E03	M7
HT115-07	VC20190	-0.968146	7	HT115	M07.R07.E03	M7
HT115-08	VC20190	-0.968146	8	HT115	M07.R08.E03	M7
HT115-09	VC20190	-0.968146	9	HT115	M07.R09.E03	M7
HT115-10	VC20190	-0.968146	10	HT115	M07.R10.E03	M7
HT115-01	VC20190	-2.06662	1	HT115	M08.R01.E03	M8
HT115-02	VC20190	-1.03331	2	HT115	M08.R02.E03	M8
HT115-03	VC20190	-2.06662	3	HT115	M08.R03.E03	M8
HT115-04	VC20190	-2.06662	4	HT115	M08.R04.E03	M8
HT115-05	VC20190	-2.06662	5	HT115	M08.R05.E03	M8
HT115-06	VC20190	-1.03331	6	HT115	M08.R06.E03	M8
HT115-07	VC20190	-2.06662	7	HT115	M08.R07.E03	M8
HT115-08	VC20190	-2.06662	8	HT115	M08.R08.E03	M8
HT115-09	VC20190	-1.03331	9	HT115	M08.R09.E03	M8
HT115-10	VC20190	-2.06662	10	HT115	M08.R10.E03	M8
ceh-18	VC20198	0.365161	51	HT115	M05.R51.E02	M5
ceh-2	VC20198	0.354992	1	HT115	M05.R01.E02	M5
dpy-11	VC20198	0.30512	74	HT115	M05.RC2.E02	M5
hbl-1	VC20198	0.31751	52	HT115	M05.R52.E02	M5
HT115	VC20198	0.382828	73	HT115	M05.RC1.E02	M5
nhr-23	VC20198	0.445345	2	HT115	M05.R02.E02	M5
pqn-21	VC20198	0.379942	3	HT115	M05.R03.E02	M5
somi-1	VC20198	0.213365	47	HT115	M05.R47.E02	M5
unc-22	VC20198	0.546208	75	HT115	M05.RC3.E02	M5
unc-39	VC20198	0.399806	48	HT115	M05.R48.E02	M5
HT115-01	VC20213	-0.179849	1	HT115	M10.R01.E02	M10
HT115-02	VC20213	-0.499862	2	HT115	M10.R02.E02	M10
HT115-03	VC20213	-0.396056	3	HT115	M10.R03.E02	M10
HT115-04	VC20213	-0.511425	4	HT115	M10.R04.E02	M10
HT115-05	VC20213	-0.360928	5	HT115	M10.R05.E02	M10
HT115-06	VC20213	-0.460209	6	HT115	M10.R06.E02	M10
HT115-07	VC20213	-0.387609	7	HT115	M10.R07.E02	M10
HT115-08	VC20213	-0.419326	8	HT115	M10.R08.E02	M10
HT115-09	VC20213	-0.472512	9	HT115	M10.R09.E02	M10
HT115-10	VC20213	-0.166509	10	HT115	M10.R10.E02	M10
Na22-01	VC20213	-0.372127	17	NA22	M10.R17.E02	M10
Na22-02	VC20213	-0.598021	18	NA22	M10.R18.E02	M10
Na22-03	VC20213	-0.403594	19	NA22	M10.R19.E02	M10
Na22-04	VC20213	-0.856005	20	NA22	M10.R20.E02	M10
Na22-05	VC20213	-0.514754	21	NA22	M10.R21.E02	M10
Na22-06	VC20213	-0.301966	22	NA22	M10.R22.E02	M10
Na22-07	VC20213	-0.110237	23	NA22	M10.R23.E02	M10
Na22-08	VC20213	-0.0436031	24	NA22	M10.R24.E02	M10
OP50-01	VC20213	-0.320658	11	OP50	M10.R11.E02	M10
OP50-02	VC20213	-0.537903	12	OP50	M10.R12.E02	M10
OP50-03	VC20213	-0.139174	13	OP50	M10.R13.E02	M10
OP50-04	VC20213	-0.162875	14	OP50	M10.R14.E02	M10
OP50-05	VC20213	0.00564849	15	OP50	M10.R15.E02	M10
OP50-06	VC20213	0.164693	16	OP50	M10.R16.E02	M10
ceh-18	VC20226	-0.736759	51	HT115	M05.R51.E02	M5
ceh-2	VC20226	-0.982345	1	HT115	M05.R01.E02	M5
dpy-11	VC20226	-0.982345	74	HT115	M05.RC2.E02	M5
hbl-1	VC20226	-0.736759	52	HT115	M05.R52.E02	M5
HT115	VC20226	-0.982345	73	HT115	M05.RC1.E02	M5
nhr-23	VC20226	-0.982345	2	HT115	M05.R02.E02	M5
pqn-21	VC20226	-0.982345	3	HT115	M05.R03.E02	M5
somi-1	VC20226	-0.982345	47	HT115	M05.R47.E02	M5
unc-22	VC20226	-0.736759	75	HT115	M05.RC3.E02	M5
unc-39	VC20226	-0.605006	48	HT115	M05.R48.E02	M5
HT115-01	VC20226	-1.13846	1	HT115	M07.R01.E03	M7
HT115-03	VC20226	-1.01188	3	HT115	M07.R03.E03	M7
HT115-04	VC20226	-0.843625	4	HT115	M07.R04.E03	M7
HT115-05	VC20226	-0.733073	5	HT115	M07.R05.E03	M7
HT115-06	VC20226	-0.518509	6	HT115	M07.R06.E03	M7
HT115-07	VC20226	-0.54721	7	HT115	M07.R07.E03	M7
HT115-08	VC20226	-0.677945	8	HT115	M07.R08.E03	M7
HT115-09	VC20226	-1.00368	9	HT115	M07.R09.E03	M7
HT115-10	VC20226	-1.08886	10	HT115	M07.R10.E03	M7
HT115-01	VC20226	-1.19563	1	HT115	M08.R01.E03	M8
HT115-02	VC20226	-1.01011	2	HT115	M08.R02.E03	M8
HT115-03	VC20226	-0.782216	3	HT115	M08.R03.E03	M8
HT115-04	VC20226	-0.637337	4	HT115	M08.R04.E03	M8
HT115-05	VC20226	-0.653601	5	HT115	M08.R05.E03	M8
HT115-06	VC20226	-1.08979	6	HT115	M08.R06.E03	M8
HT115-07	VC20226	-0.480903	7	HT115	M08.R07.E03	M8
HT115-08	VC20226	-1.15002	8	HT115	M08.R08.E03	M8
HT115-09	VC20226	-1.01612	9	HT115	M08.R09.E03	M8
HT115-10	VC20226	-0.914534	10	HT115	M08.R10.E03	M8
Na22-A1	VC20233	-1.12792	1	NA22	M1.R01.E05A.R01.E02	M1
Na22-A2	VC20233	-1.12792	2	NA22	M1.R01.E05A.R02.E02	M1
Na22-A3	VC20233	-1.12792	3	NA22	M1.R01.E05A.R03.E02	M1
Na22-A4	VC20233	-1.12792	4	NA22	M1.R01.E05A.R04.E02	M1
Na22-B5	VC20233	-1.12792	5	NA22	M1.R01.E05B.R01.E02	M1
Na22-B6	VC20233	-1.12792	6	NA22	M1.R01.E05B.R02.E02	M1
Na22-B7	VC20233	-1.12792	7	NA22	M1.R01.E05B.R03.E02	M1
Na22-B8	VC20233	-1.12792	8	NA22	M1.R01.E05B.R04.E02	M1
Na22-A2	VC20233	-0.23141	2	NA22	M3.10K.R02.E02A	M3
Na22-A5	VC20233	-0.293785	6	NA22	M3.10K.R05.E02A	M3
Na22-A7	VC20233	-0.37119	7	NA22	M3.10K.R07.E02A	M3
Na22-A8	VC20233	-0.308164	9	NA22	M3.10K.R08.E02A	M3
Na22-B1	VC20233	-0.289246	1	NA22	M3.10K.R01.E02B	M3
Na22-B2	VC20233	-0.231167	3	NA22	M3.10K.R02.E02B	M3
Na22-B3	VC20233	-0.28025	4	NA22	M3.10K.R03.E02B	M3
Na22-B4	VC20233	-0.177004	5	NA22	M3.10K.R04.E02B	M3
Na22-B7	VC20233	-0.270756	8	NA22	M3.10K.R07.E02B	M3
Na22-B8	VC20233	-0.206915	10	NA22	M3.10K.R08.E02B	M3
HT115-01	VC20233	-0.00246059	1	HT115	M07.R01.E03	M7
HT115-03	VC20233	0.171828	3	HT115	M07.R03.E03	M7
HT115-04	VC20233	0.106965	4	HT115	M07.R04.E03	M7
HT115-05	VC20233	0.140531	5	HT115	M07.R05.E03	M7
HT115-06	VC20233	0.143659	6	HT115	M07.R06.E03	M7
HT115-07	VC20233	-0.122854	7	HT115	M07.R07.E03	M7
HT115-08	VC20233	0.0641283	8	HT115	M07.R08.E03	M7
HT115-09	VC20233	-0.192958	9	HT115	M07.R09.E03	M7
HT115-10	VC20233	0.225912	10	HT115	M07.R10.E03	M7
HT115-01	VC20233	0.00160389	1	HT115	M08.R01.E03	M8
HT115-02	VC20233	0.0694993	2	HT115	M08.R02.E03	M8
HT115-03	VC20233	0.0247345	3	HT115	M08.R03.E03	M8
HT115-04	VC20233	0.052685	4	HT115	M08.R04.E03	M8
HT115-05	VC20233	-0.0410841	5	HT115	M08.R05.E03	M8
HT115-06	VC20233	-0.025045	6	HT115	M08.R06.E03	M8
HT115-07	VC20233	-0.069536	7	HT115	M08.R07.E03	M8
HT115-08	VC20233	0.107246	8	HT115	M08.R08.E03	M8
HT115-09	VC20233	0.0372894	9	HT115	M08.R09.E03	M8
HT115-10	VC20233	0.203824	10	HT115	M08.R10.E03	M8
Na22-A2	VC20239	-1.396	2	NA22	M3.10K.R02.E02A	M3
Na22-A5	VC20239	-1.396	6	NA22	M3.10K.R05.E02A	M3
Na22-A7	VC20239	-1.396	7	NA22	M3.10K.R07.E02A	M3
Na22-A8	VC20239	-1.396	9	NA22	M3.10K.R08.E02A	M3
Na22-B1	VC20239	-0.930667	1	NA22	M3.10K.R01.E02B	M3
Na22-B2	VC20239	-1.396	3	NA22	M3.10K.R02.E02B	M3
Na22-B3	VC20239	-1.396	4	NA22	M3.10K.R03.E02B	M3
Na22-B4	VC20239	-0.930667	5	NA22	M3.10K.R04.E02B	M3
Na22-B7	VC20239	-1.396	8	NA22	M3.10K.R07.E02B	M3
Na22-B8	VC20239	-1.396	10	NA22	M3.10K.R08.E02B	M3
Na22-A1	VC20263	-1.49027	1	NA22	M1.R01.E05A.R01.E02	M1
Na22-A2	VC20263	-1.49027	2	NA22	M1.R01.E05A.R02.E02	M1
Na22-A3	VC20263	-1.49027	3	NA22	M1.R01.E05A.R03.E02	M1
Na22-A4	VC20263	-1.49027	4	NA22	M1.R01.E05A.R04.E02	M1
Na22-B5	VC20263	-1.49027	5	NA22	M1.R01.E05B.R01.E02	M1
Na22-B6	VC20263	-1.49027	6	NA22	M1.R01.E05B.R02.E02	M1
Na22-B7	VC20263	-1.49027	7	NA22	M1.R01.E05B.R03.E02	M1
Na22-B8	VC20263	-1.49027	8	NA22	M1.R01.E05B.R04.E02	M1
Na22-A2	VC20263	-1.63197	2	NA22	M3.10K.R02.E02A	M3
Na22-A5	VC20263	-1.63197	6	NA22	M3.10K.R05.E02A	M3
Na22-A7	VC20263	-1.63197	7	NA22	M3.10K.R07.E02A	M3
Na22-A8	VC20263	-1.63197	9	NA22	M3.10K.R08.E02A	M3
Na22-B1	VC20263	-1.63197	1	NA22	M3.10K.R01.E02B	M3
Na22-B2	VC20263	-1.63197	3	NA22	M3.10K.R02.E02B	M3
Na22-B3	VC20263	-1.63197	4	NA22	M3.10K.R03.E02B	M3
Na22-B4	VC20263	-1.63197	5	NA22	M3.10K.R04.E02B	M3
Na22-B7	VC20263	-1.63197	8	NA22	M3.10K.R07.E02B	M3
Na22-B8	VC20263	-1.63197	10	NA22	M3.10K.R08.E02B	M3
Na22-A1	VC20293	-1.07568	1	NA22	M1.R01.E05A.R01.E02	M1
Na22-A2	VC20293	-1.07568	2	NA22	M1.R01.E05A.R02.E02	M1
Na22-A3	VC20293	-1.07568	3	NA22	M1.R01.E05A.R03.E02	M1
Na22-A4	VC20293	-1.07568	4	NA22	M1.R01.E05A.R04.E02	M1
Na22-B5	VC20293	-1.07568	5	NA22	M1.R01.E05B.R01.E02	M1
Na22-B6	VC20293	-1.07568	6	NA22	M1.R01.E05B.R02.E02	M1
Na22-B7	VC20293	-1.07568	7	NA22	M1.R01.E05B.R03.E02	M1
Na22-B8	VC20293	-1.07568	8	NA22	M1.R01.E05B.R04.E02	M1
HT115-01	VC20293	0.0422618	1	HT115	M07.R01.E03	M7
HT115-03	VC20293	-0.173724	3	HT115	M07.R03.E03	M7
HT115-04	VC20293	-0.126273	4	HT115	M07.R04.E03	M7
HT115-05	VC20293	-0.414116	5	HT115	M07.R05.E03	M7
HT115-06	VC20293	-0.187932	6	HT115	M07.R06.E03	M7
HT115-07	VC20293	0.0196374	7	HT115	M07.R07.E03	M7
HT115-08	VC20293	-0.0943509	8	HT115	M07.R08.E03	M7
HT115-09	VC20293	-0.238699	9	HT115	M07.R09.E03	M7
HT115-10	VC20293	-0.199396	10	HT115	M07.R10.E03	M7
HT115-01	VC20293	-0.235128	1	HT115	M08.R01.E03	M8
HT115-02	VC20293	-0.694483	2	HT115	M08.R02.E03	M8
HT115-03	VC20293	-0.491138	3	HT115	M08.R03.E03	M8
HT115-04	VC20293	-0.528457	4	HT115	M08.R04.E03	M8
HT115-05	VC20293	-0.560371	5	HT115	M08.R05.E03	M8
HT115-06	VC20293	-0.660281	6	HT115	M08.R06.E03	M8
HT115-07	VC20293	-0.517223	7	HT115	M08.R07.E03	M8
HT115-08	VC20293	-0.499567	8	HT115	M08.R08.E03	M8
HT115-09	VC20293	-0.441794	9	HT115	M08.R09.E03	M8
HT115-10	VC20293	-0.32523	10	HT115	M08.R10.E03	M8
HT115-01	VC20338	-0.397393	1	HT115	M07.R01.E03	M7
HT115-03	VC20338	-0.204223	3	HT115	M07.R03.E03	M7
HT115-04	VC20338	-0.368692	4	HT115	M07.R04.E03	M7
HT115-05	VC20338	-0.237064	5	HT115	M07.R05.E03	M7
HT115-06	VC20338	-0.4525	6	HT115	M07.R06.E03	M7
HT115-07	VC20338	-0.533995	7	HT115	M07.R07.E03	M7
HT115-08	VC20338	-0.0604526	8	HT115	M07.R08.E03	M7
HT115-09	VC20338	-0.415616	9	HT115	M07.R09.E03	M7
HT115-10	VC20338	-0.270396	10	HT115	M07.R10.E03	M7
HT115-01	VC20338	-0.449647	1	HT115	M08.R01.E03	M8
HT115-02	VC20338	-0.233744	2	HT115	M08.R02.E03	M8
HT115-03	VC20338	-0.432577	3	HT115	M08.R03.E03	M8
HT115-04	VC20338	-0.524909	4	HT115	M08.R04.E03	M8
HT115-05	VC20338	-0.460505	5	HT115	M08.R05.E03	M8
HT115-06	VC20338	-0.581685	6	HT115	M08.R06.E03	M8
HT115-07	VC20338	-0.357831	7	HT115	M08.R07.E03	M8
HT115-08	VC20338	-0.348798	8	HT115	M08.R08.E03	M8
HT115-09	VC20338	-0.67005	9	HT115	M08.R09.E03	M8
HT115-10	VC20338	-0.445289	10	HT115	M08.R10.E03	M8
HT115-01	VC20345	-0.470455	1	HT115	M11.R01.E02	M11
HT115-02	VC20345	-0.678945	2	HT115	M11.R02.E02	M11
HT115-03	VC20345	-0.682669	3	HT115	M11.R03.E02	M11
HT115-04	VC20345	-0.705351	4	HT115	M11.R04.E02	M11
HT115-05	VC20345	-0.489543	5	HT115	M11.R05.E02	M11
HT115.liquid-01	VC20345	-0.411192	6	HT115	M11.R06.E02	M11
HT115.liquid-02	VC20345	-0.379101	7	HT115	M11.R07.E02	M11
HT115.liquid-03	VC20345	-0.330141	8	HT115	M11.R08.E02	M11
HT115.liquid-04	VC20345	-0.555679	9	HT115	M11.R09.E02	M11
HT115.liquid-05	VC20345	-0.349784	10	HT115	M11.R10.E02	M11
Na22-01	VC20345	-0.444344	17	NA22	M11.R17.E02	M11
Na22-02	VC20345	-0.566009	18	NA22	M11.R18.E02	M11
Na22-03	VC20345	-0.402417	19	NA22	M11.R19.E02	M11
Na22-04	VC20345	-0.224772	20	NA22	M11.R20.E02	M11
Na22.liquid-01	VC20345	-0.49251	21	NA22	M11.R21.E02	M11
Na22.liquid-02	VC20345	-0.479653	22	NA22	M11.R22.E02	M11
Na22.liquid-03	VC20345	-0.535825	23	NA22	M11.R23.E02	M11
Na22.liquid-04	VC20345	-0.544878	24	NA22	M11.R24.E02	M11
OP50-01	VC20345	-0.388306	11	OP50	M11.R11.E02	M11
OP50-02	VC20345	-0.527642	12	OP50	M11.R12.E02	M11
OP50-03	VC20345	-0.66688	13	OP50	M11.R13.E02	M11
OP50-04	VC20345	-0.492323	14	OP50	M11.R14.E02	M11
OP50-05	VC20345	-0.293988	15	OP50	M11.R15.E02	M11
OP50-06	VC20345	-0.401686	16	OP50	M11.R16.E02	M11
ceh-18	VC20348	-1.74118	51	HT115	M05.R51.E02	M5
ceh-2	VC20348	-1.74118	1	HT115	M05.R01.E02	M5
dpy-11	VC20348	-1.74118	74	HT115	M05.RC2.E02	M5
hbl-1	VC20348	-0.435295	52	HT115	M05.R52.E02	M5
HT115	VC20348	-1.74118	73	HT115	M05.RC1.E02	M5
nhr-23	VC20348	-0.87059	2	HT115	M05.R02.E02	M5
pqn-21	VC20348	-0.87059	3	HT115	M05.R03.E02	M5
somi-1	VC20348	-0.87059	47	HT115	M05.R47.E02	M5
unc-22	VC20348	-0.435295	75	HT115	M05.RC3.E02	M5
unc-39	VC20348	-1.74118	48	HT115	M05.R48.E02	M5
HT115-01	VC20405	-0.179756	1	HT115	M11.R01.E02	M11
HT115-02	VC20405	-0.118169	2	HT115	M11.R02.E02	M11
HT115-03	VC20405	-0.0998419	3	HT115	M11.R03.E02	M11
HT115-04	VC20405	-0.149921	4	HT115	M11.R04.E02	M11
HT115-05	VC20405	-0.0425705	5	HT115	M11.R05.E02	M11
HT115.liquid-01	VC20405	-0.000238766	6	HT115	M11.R06.E02	M11
HT115.liquid-02	VC20405	-0.0562105	7	HT115	M11.R07.E02	M11
HT115.liquid-03	VC20405	0.00279753	8	HT115	M11.R08.E02	M11
HT115.liquid-04	VC20405	0.0102413	9	HT115	M11.R09.E02	M11
HT115.liquid-05	VC20405	-0.09502	10	HT115	M11.R10.E02	M11
Na22-01	VC20405	-0.150486	17	NA22	M11.R17.E02	M11
Na22-02	VC20405	-0.349064	18	NA22	M11.R18.E02	M11
Na22-03	VC20405	-0.37273	19	NA22	M11.R19.E02	M11
Na22-04	VC20405	-0.54358	20	NA22	M11.R20.E02	M11
Na22.liquid-01	VC20405	-0.0204122	21	NA22	M11.R21.E02	M11
Na22.liquid-02	VC20405	-0.0849946	22	NA22	M11.R22.E02	M11
Na22.liquid-03	VC20405	-0.000161655	23	NA22	M11.R23.E02	M11
Na22.liquid-04	VC20405	-0.0722599	24	NA22	M11.R24.E02	M11
OP50-01	VC20405	-0.140376	11	OP50	M11.R11.E02	M11
OP50-02	VC20405	-0.191871	12	OP50	M11.R12.E02	M11
OP50-03	VC20405	-0.0125454	13	OP50	M11.R13.E02	M11
OP50-04	VC20405	-0.0582052	14	OP50	M11.R14.E02	M11
OP50-05	VC20405	-0.283179	15	OP50	M11.R15.E02	M11
OP50-06	VC20405	-0.383484	16	OP50	M11.R16.E02	M11
HT115-01	VC20407	0.0146417	1	HT115	M11.R01.E02	M11
HT115-02	VC20407	-0.00427405	2	HT115	M11.R02.E02	M11
HT115-03	VC20407	0.0388561	3	HT115	M11.R03.E02	M11
HT115-04	VC20407	-0.000175372	4	HT115	M11.R04.E02	M11
HT115-05	VC20407	-0.132354	5	HT115	M11.R05.E02	M11
HT115.liquid-01	VC20407	0.458704	6	HT115	M11.R06.E02	M11
HT115.liquid-02	VC20407	0.389927	7	HT115	M11.R07.E02	M11
HT115.liquid-03	VC20407	0.350474	8	HT115	M11.R08.E02	M11
HT115.liquid-04	VC20407	0.411559	9	HT115	M11.R09.E02	M11
HT115.liquid-05	VC20407	0.291154	10	HT115	M11.R10.E02	M11
Na22-01	VC20407	-0.0896561	17	NA22	M11.R17.E02	M11
Na22-02	VC20407	-0.379934	18	NA22	M11.R18.E02	M11
Na22-03	VC20407	-0.553223	19	NA22	M11.R19.E02	M11
Na22-04	VC20407	-0.528951	20	NA22	M11.R20.E02	M11
Na22.liquid-01	VC20407	0.466156	21	NA22	M11.R21.E02	M11
Na22.liquid-02	VC20407	0.41536	22	NA22	M11.R22.E02	M11
Na22.liquid-03	VC20407	0.419753	23	NA22	M11.R23.E02	M11
Na22.liquid-04	VC20407	0.339369	24	NA22	M11.R24.E02	M11
OP50-01	VC20407	-0.294844	11	OP50	M11.R11.E02	M11
OP50-02	VC20407	-0.0742097	12	OP50	M11.R12.E02	M11
OP50-03	VC20407	0.00986569	13	OP50	M11.R13.E02	M11
OP50-04	VC20407	-0.0505093	14	OP50	M11.R14.E02	M11
OP50-05	VC20407	-0.565212	15	OP50	M11.R15.E02	M11
OP50-06	VC20407	-0.46317	16	OP50	M11.R16.E02	M11
HT115-01	VC20408	-0.286369	1	HT115	M10.R01.E02	M10
HT115-02	VC20408	-0.472179	2	HT115	M10.R02.E02	M10
HT115-03	VC20408	-0.332096	3	HT115	M10.R03.E02	M10
HT115-04	VC20408	-0.169498	4	HT115	M10.R04.E02	M10
HT115-05	VC20408	-0.446358	5	HT115	M10.R05.E02	M10
HT115-06	VC20408	-0.148086	6	HT115	M10.R06.E02	M10
HT115-07	VC20408	-0.358092	7	HT115	M10.R07.E02	M10
HT115-08	VC20408	-0.289021	8	HT115	M10.R08.E02	M10
HT115-09	VC20408	-0.313222	9	HT115	M10.R09.E02	M10
HT115-10	VC20408	-0.481015	10	HT115	M10.R10.E02	M10
Na22-01	VC20408	-0.476124	17	NA22	M10.R17.E02	M10
Na22-02	VC20408	-0.487471	18	NA22	M10.R18.E02	M10
Na22-03	VC20408	-0.326997	19	NA22	M10.R19.E02	M10
Na22-04	VC20408	-0.201786	20	NA22	M10.R20.E02	M10
Na22-05	VC20408	-0.314969	21	NA22	M10.R21.E02	M10
Na22-06	VC20408	-0.10869	22	NA22	M10.R22.E02	M10
Na22-07	VC20408	-0.0607717	23	NA22	M10.R23.E02	M10
Na22-08	VC20408	-0.164284	24	NA22	M10.R24.E02	M10
OP50-01	VC20408	-0.469586	11	OP50	M10.R11.E02	M10
OP50-02	VC20408	-0.358364	12	OP50	M10.R12.E02	M10
OP50-03	VC20408	-0.424225	13	OP50	M10.R13.E02	M10
OP50-04	VC20408	-0.413606	14	OP50	M10.R14.E02	M10
OP50-05	VC20408	-0.324301	15	OP50	M10.R15.E02	M10
OP50-06	VC20408	-0.157531	16	OP50	M10.R16.E02	M10
HT115-01	VC20409	-0.821329	1	HT115	M10.R01.E02	M10
HT115-02	VC20409	-0.650073	2	HT115	M10.R02.E02	M10
HT115-03	VC20409	-0.783372	3	HT115	M10.R03.E02	M10
HT115-04	VC20409	-0.51198	4	HT115	M10.R04.E02	M10
HT115-05	VC20409	-0.619727	5	HT115	M10.R05.E02	M10
HT115-06	VC20409	-0.702827	6	HT115	M10.R06.E02	M10
HT115-07	VC20409	-0.66126	7	HT115	M10.R07.E02	M10
HT115-08	VC20409	-0.681209	8	HT115	M10.R08.E02	M10
HT115-09	VC20409	-0.673054	9	HT115	M10.R09.E02	M10
HT115-10	VC20409	-0.85659	10	HT115	M10.R10.E02	M10
Na22-01	VC20409	-0.774228	17	NA22	M10.R17.E02	M10
Na22-02	VC20409	-0.786311	18	NA22	M10.R18.E02	M10
Na22-03	VC20409	-0.613343	19	NA22	M10.R19.E02	M10
Na22-04	VC20409	-0.886081	20	NA22	M10.R20.E02	M10
Na22-05	VC20409	-0.474053	21	NA22	M10.R21.E02	M10
Na22-06	VC20409	-0.877087	22	NA22	M10.R22.E02	M10
Na22-07	VC20409	-0.878883	23	NA22	M10.R23.E02	M10
Na22-08	VC20409	-0.635768	24	NA22	M10.R24.E02	M10
OP50-01	VC20409	-0.867445	11	OP50	M10.R11.E02	M10
OP50-02	VC20409	-0.861382	12	OP50	M10.R12.E02	M10
OP50-03	VC20409	-0.542034	13	OP50	M10.R13.E02	M10
OP50-04	VC20409	-0.476866	14	OP50	M10.R14.E02	M10
OP50-05	VC20409	-1.13652	15	OP50	M10.R15.E02	M10
OP50-06	VC20409	-1.11845	16	OP50	M10.R16.E02	M10
HT115-01	VC20409	-0.38608	1	HT115	M11.R01.E02	M11
HT115-02	VC20409	-0.505936	2	HT115	M11.R02.E02	M11
HT115-03	VC20409	-0.412839	3	HT115	M11.R03.E02	M11
HT115-04	VC20409	-0.450187	4	HT115	M11.R04.E02	M11
HT115-05	VC20409	-0.493058	5	HT115	M11.R05.E02	M11
HT115.liquid-01	VC20409	-0.42466	6	HT115	M11.R06.E02	M11
HT115.liquid-02	VC20409	-0.525871	7	HT115	M11.R07.E02	M11
HT115.liquid-03	VC20409	-0.405916	8	HT115	M11.R08.E02	M11
HT115.liquid-04	VC20409	-0.41087	9	HT115	M11.R09.E02	M11
HT115.liquid-05	VC20409	-0.17095	10	HT115	M11.R10.E02	M11
Na22-01	VC20409	-0.502523	17	NA22	M11.R17.E02	M11
Na22-02	VC20409	-0.455223	18	NA22	M11.R18.E02	M11
Na22-03	VC20409	-0.367254	19	NA22	M11.R19.E02	M11
Na22-04	VC20409	-0.520354	20	NA22	M11.R20.E02	M11
Na22.liquid-01	VC20409	-0.295257	21	NA22	M11.R21.E02	M11
Na22.liquid-02	VC20409	-0.407949	22	NA22	M11.R22.E02	M11
Na22.liquid-03	VC20409	-0.393508	23	NA22	M11.R23.E02	M11
Na22.liquid-04	VC20409	-0.322771	24	NA22	M11.R24.E02	M11
OP50-01	VC20409	-0.423947	11	OP50	M11.R11.E02	M11
OP50-02	VC20409	-0.49488	12	OP50	M11.R12.E02	M11
OP50-03	VC20409	-0.323055	13	OP50	M11.R13.E02	M11
OP50-04	VC20409	-0.857574	14	OP50	M11.R14.E02	M11
OP50-05	VC20409	-0.605312	15	OP50	M11.R15.E02	M11
OP50-06	VC20409	-0.435488	16	OP50	M11.R16.E02	M11
Na22-A1	VC20413	-0.2666	1	NA22	M1.R01.E05A.R01.E02	M1
Na22-A2	VC20413	-0.555606	2	NA22	M1.R01.E05A.R02.E02	M1
Na22-A3	VC20413	-0.403727	3	NA22	M1.R01.E05A.R03.E02	M1
Na22-A4	VC20413	-0.428635	4	NA22	M1.R01.E05A.R04.E02	M1
Na22-B5	VC20413	-0.314809	5	NA22	M1.R01.E05B.R01.E02	M1
Na22-B6	VC20413	-0.462879	6	NA22	M1.R01.E05B.R02.E02	M1
Na22-B7	VC20413	-0.473032	7	NA22	M1.R01.E05B.R03.E02	M1
Na22-B8	VC20413	-0.46307	8	NA22	M1.R01.E05B.R04.E02	M1
Na22-A2	VC20413	-0.313346	2	NA22	M3.10K.R02.E02A	M3
Na22-A5	VC20413	-0.475234	6	NA22	M3.10K.R05.E02A	M3
Na22-A7	VC20413	-0.446742	7	NA22	M3.10K.R07.E02A	M3
Na22-A8	VC20413	-0.396912	9	NA22	M3.10K.R08.E02A	M3
Na22-B1	VC20413	-0.276748	1	NA22	M3.10K.R01.E02B	M3
Na22-B2	VC20413	-0.257299	3	NA22	M3.10K.R02.E02B	M3
Na22-B3	VC20413	-0.314676	4	NA22	M3.10K.R03.E02B	M3
Na22-B4	VC20413	-0.450231	5	NA22	M3.10K.R04.E02B	M3
Na22-B7	VC20413	-0.438854	8	NA22	M3.10K.R07.E02B	M3
Na22-B8	VC20413	-0.475428	10	NA22	M3.10K.R08.E02B	M3
HT115-01	VC20416	-0.771298	1	HT115	M10.R01.E02	M10
HT115-02	VC20416	-0.687304	2	HT115	M10.R02.E02	M10
HT115-03	VC20416	-0.899801	3	HT115	M10.R03.E02	M10
HT115-04	VC20416	-0.767656	4	HT115	M10.R04.E02	M10
HT115-05	VC20416	-0.568012	5	HT115	M10.R05.E02	M10
HT115-06	VC20416	-1.01941	6	HT115	M10.R06.E02	M10
HT115-07	VC20416	-0.788139	7	HT115	M10.R07.E02	M10
HT115-08	VC20416	-0.853397	8	HT115	M10.R08.E02	M10
HT115-09	VC20416	-0.659551	9	HT115	M10.R09.E02	M10
HT115-10	VC20416	-0.639082	10	HT115	M10.R10.E02	M10
Na22-01	VC20416	-0.774647	17	NA22	M10.R17.E02	M10
Na22-02	VC20416	-0.597049	18	NA22	M10.R18.E02	M10
Na22-03	VC20416	-0.792747	19	NA22	M10.R19.E02	M10
Na22-04	VC20416	-0.690396	20	NA22	M10.R20.E02	M10
Na22-05	VC20416	-0.953522	21	NA22	M10.R21.E02	M10
Na22-06	VC20416	-0.879326	22	NA22	M10.R22.E02	M10
Na22-07	VC20416	-0.918742	23	NA22	M10.R23.E02	M10
Na22-08	VC20416	-0.508479	24	NA22	M10.R24.E02	M10
OP50-01	VC20416	-0.884947	11	OP50	M10.R11.E02	M10
OP50-02	VC20416	-0.692389	12	OP50	M10.R12.E02	M10
OP50-03	VC20416	-0.885902	13	OP50	M10.R13.E02	M10
OP50-04	VC20416	-0.593741	14	OP50	M10.R14.E02	M10
OP50-05	VC20416	-0.817423	15	OP50	M10.R15.E02	M10
OP50-06	VC20416	-0.956431	16	OP50	M10.R16.E02	M10
HT115-01	VC20420	-0.75473	1	HT115	M11.R01.E02	M11
HT115-02	VC20420	-0.455617	2	HT115	M11.R02.E02	M11
HT115-03	VC20420	-0.528621	3	HT115	M11.R03.E02	M11
HT115-04	VC20420	-0.475423	4	HT115	M11.R04.E02	M11
HT115-05	VC20420	-0.387357	5	HT115	M11.R05.E02	M11
HT115.liquid-01	VC20420	-0.296238	6	HT115	M11.R06.E02	M11
HT115.liquid-02	VC20420	-0.405643	7	HT115	M11.R07.E02	M11
HT115.liquid-03	VC20420	-0.11962	8	HT115	M11.R08.E02	M11
HT115.liquid-04	VC20420	-0.475839	9	HT115	M11.R09.E02	M11
HT115.liquid-05	VC20420	-0.300295	10	HT115	M11.R10.E02	M11
Na22-01	VC20420	-0.416897	17	NA22	M11.R17.E02	M11
Na22-02	VC20420	-0.398995	18	NA22	M11.R18.E02	M11
Na22-03	VC20420	-0.287673	19	NA22	M11.R19.E02	M11
Na22-04	VC20420	-0.286704	20	NA22	M11.R20.E02	M11
Na22.liquid-01	VC20420	-0.485037	21	NA22	M11.R21.E02	M11
Na22.liquid-02	VC20420	-0.469891	22	NA22	M11.R22.E02	M11
Na22.liquid-03	VC20420	-0.535341	23	NA22	M11.R23.E02	M11
Na22.liquid-04	VC20420	-0.282349	24	NA22	M11.R24.E02	M11
OP50-01	VC20420	-0.24177	11	OP50	M11.R11.E02	M11
OP50-02	VC20420	-0.326745	12	OP50	M11.R12.E02	M11
OP50-03	VC20420	-0.741846	13	OP50	M11.R13.E02	M11
OP50-04	VC20420	-0.680482	14	OP50	M11.R14.E02	M11
OP50-05	VC20420	-0.391299	15	OP50	M11.R15.E02	M11
OP50-06	VC20420	-0.616256	16	OP50	M11.R16.E02	M11
HT115-01	VC20424	-0.190452	1	HT115	M10.R01.E02	M10
HT115-02	VC20424	-0.571994	2	HT115	M10.R02.E02	M10
HT115-03	VC20424	-0.157393	3	HT115	M10.R03.E02	M10
HT115-04	VC20424	-0.284999	4	HT115	M10.R04.E02	M10
HT115-05	VC20424	-0.204282	5	HT115	M10.R05.E02	M10
HT115-06	VC20424	-0.214931	6	HT115	M10.R06.E02	M10
HT115-07	VC20424	-0.32892	7	HT115	M10.R07.E02	M10
HT115-08	VC20424	-0.213879	8	HT115	M10.R08.E02	M10
HT115-09	VC20424	-0.107908	9	HT115	M10.R09.E02	M10
HT115-10	VC20424	-0.127797	10	HT115	M10.R10.E02	M10
Na22-01	VC20424	-0.40112	17	NA22	M10.R17.E02	M10
Na22-02	VC20424	-0.59035	18	NA22	M10.R18.E02	M10
Na22-03	VC20424	-0.363434	19	NA22	M10.R19.E02	M10
Na22-04	VC20424	-0.240371	20	NA22	M10.R20.E02	M10
Na22-05	VC20424	-0.426839	21	NA22	M10.R21.E02	M10
Na22-06	VC20424	-0.280323	22	NA22	M10.R22.E02	M10
Na22-07	VC20424	0.0143414	23	NA22	M10.R23.E02	M10
Na22-08	VC20424	-0.0924239	24	NA22	M10.R24.E02	M10
OP50-01	VC20424	-0.628067	11	OP50	M10.R11.E02	M10
OP50-02	VC20424	-0.543715	12	OP50	M10.R12.E02	M10
OP50-03	VC20424	-0.377678	13	OP50	M10.R13.E02	M10
OP50-04	VC20424	-0.498593	14	OP50	M10.R14.E02	M10
OP50-05	VC20424	-0.090146	15	OP50	M10.R15.E02	M10
OP50-06	VC20424	-0.360318	16	OP50	M10.R16.E02	M10
HT115-01	VC20427	-0.5918	1	HT115	M11.R01.E02	M11
HT115-02	VC20427	-0.772159	2	HT115	M11.R02.E02	M11
HT115-03	VC20427	-0.488377	3	HT115	M11.R03.E02	M11
HT115-04	VC20427	-0.576184	4	HT115	M11.R04.E02	M11
HT115-05	VC20427	-0.826298	5	HT115	M11.R05.E02	M11
HT115.liquid-01	VC20427	-0.260634	6	HT115	M11.R06.E02	M11
HT115.liquid-02	VC20427	-0.378048	7	HT115	M11.R07.E02	M11
HT115.liquid-03	VC20427	-0.300531	8	HT115	M11.R08.E02	M11
HT115.liquid-04	VC20427	-0.399016	9	HT115	M11.R09.E02	M11
HT115.liquid-05	VC20427	-0.292391	10	HT115	M11.R10.E02	M11
Na22-01	VC20427	-0.507967	17	NA22	M11.R17.E02	M11
Na22-02	VC20427	-0.663586	18	NA22	M11.R18.E02	M11
Na22-03	VC20427	-0.572228	19	NA22	M11.R19.E02	M11
Na22-04	VC20427	-0.34954	20	NA22	M11.R20.E02	M11
Na22.liquid-01	VC20427	-0.364634	21	NA22	M11.R21.E02	M11
Na22.liquid-02	VC20427	-0.405716	22	NA22	M11.R22.E02	M11
Na22.liquid-03	VC20427	-0.378508	23	NA22	M11.R23.E02	M11
Na22.liquid-04	VC20427	-0.384069	24	NA22	M11.R24.E02	M11
OP50-01	VC20427	-0.556741	11	OP50	M11.R11.E02	M11
OP50-02	VC20427	-0.641449	12	OP50	M11.R12.E02	M11
OP50-03	VC20427	-0.409823	13	OP50	M11.R13.E02	M11
OP50-04	VC20427	-0.986238	14	OP50	M11.R14.E02	M11
OP50-05	VC20427	-0.529132	15	OP50	M11.R15.E02	M11
OP50-06	VC20427	-0.533354	16	OP50	M11.R16.E02	M11
HT115-01	VC20428	0.170001	1	HT115	M10.R01.E02	M10
HT115-02	VC20428	0.0619422	2	HT115	M10.R02.E02	M10
HT115-03	VC20428	0.071496	3	HT115	M10.R03.E02	M10
HT115-04	VC20428	0.134826	4	HT115	M10.R04.E02	M10
HT115-05	VC20428	0.065265	5	HT115	M10.R05.E02	M10
HT115-06	VC20428	0.194245	6	HT115	M10.R06.E02	M10
HT115-07	VC20428	0.0886827	7	HT115	M10.R07.E02	M10
HT115-08	VC20428	0.241276	8	HT115	M10.R08.E02	M10
HT115-09	VC20428	0.00514433	9	HT115	M10.R09.E02	M10
HT115-10	VC20428	0.12529	10	HT115	M10.R10.E02	M10
Na22-01	VC20428	0.325069	17	NA22	M10.R17.E02	M10
Na22-02	VC20428	0.213396	18	NA22	M10.R18.E02	M10
Na22-03	VC20428	0.152774	19	NA22	M10.R19.E02	M10
Na22-04	VC20428	0.0811635	20	NA22	M10.R20.E02	M10
Na22-05	VC20428	0.0698853	21	NA22	M10.R21.E02	M10
Na22-06	VC20428	-0.0266513	22	NA22	M10.R22.E02	M10
Na22-07	VC20428	-0.092492	23	NA22	M10.R23.E02	M10
Na22-08	VC20428	0.0692968	24	NA22	M10.R24.E02	M10
OP50-01	VC20428	0.3024	11	OP50	M10.R11.E02	M10
OP50-02	VC20428	0.331997	12	OP50	M10.R12.E02	M10
OP50-03	VC20428	0.402951	13	OP50	M10.R13.E02	M10
OP50-04	VC20428	0.373684	14	OP50	M10.R14.E02	M10
OP50-05	VC20428	0.24289	15	OP50	M10.R15.E02	M10
OP50-06	VC20428	0.299304	16	OP50	M10.R16.E02	M10
HT115-01	VC20430	-0.235697	1	HT115	M10.R01.E02	M10
HT115-02	VC20430	-0.120022	2	HT115	M10.R02.E02	M10
HT115-03	VC20430	-0.00514288	3	HT115	M10.R03.E02	M10
HT115-04	VC20430	0.0335375	4	HT115	M10.R04.E02	M10
HT115-05	VC20430	0.0535763	5	HT115	M10.R05.E02	M10
HT115-06	VC20430	-0.0929292	6	HT115	M10.R06.E02	M10
HT115-07	VC20430	-0.161812	7	HT115	M10.R07.E02	M10
HT115-08	VC20430	-0.0273975	8	HT115	M10.R08.E02	M10
HT115-09	VC20430	-0.190093	9	HT115	M10.R09.E02	M10
HT115-10	VC20430	-0.311185	10	HT115	M10.R10.E02	M10
Na22-01	VC20430	0.0796818	17	NA22	M10.R17.E02	M10
Na22-02	VC20430	0.0282931	18	NA22	M10.R18.E02	M10
Na22-03	VC20430	0.0473771	19	NA22	M10.R19.E02	M10
Na22-04	VC20430	0.0492114	20	NA22	M10.R20.E02	M10
Na22-05	VC20430	0.0302608	21	NA22	M10.R21.E02	M10
Na22-06	VC20430	-0.00351536	22	NA22	M10.R22.E02	M10
Na22-07	VC20430	0.0296733	23	NA22	M10.R23.E02	M10
Na22-08	VC20430	-0.317654	24	NA22	M10.R24.E02	M10
OP50-01	VC20430	-0.289662	11	OP50	M10.R11.E02	M10
OP50-02	VC20430	-0.0714134	12	OP50	M10.R12.E02	M10
OP50-03	VC20430	-0.0262953	13	OP50	M10.R13.E02	M10
OP50-04	VC20430	-0.431222	14	OP50	M10.R14.E02	M10
OP50-05	VC20430	0.0437784	15	OP50	M10.R15.E02	M10
OP50-06	VC20430	0.166116	16	OP50	M10.R16.E02	M10
HT115-01	VC20433	0.102272	1	HT115	M10.R01.E02	M10
HT115-02	VC20433	-0.132874	2	HT115	M10.R02.E02	M10
HT115-03	VC20433	-0.162961	3	HT115	M10.R03.E02	M10
HT115-04	VC20433	-0.0720093	4	HT115	M10.R04.E02	M10
HT115-05	VC20433	-0.224478	5	HT115	M10.R05.E02	M10
HT115-06	VC20433	-0.124176	6	HT115	M10.R06.E02	M10
HT115-07	VC20433	-0.0427917	7	HT115	M10.R07.E02	M10
HT115-08	VC20433	-0.109528	8	HT115	M10.R08.E02	M10
HT115-09	VC20433	-0.0819875	9	HT115	M10.R09.E02	M10
HT115-10	VC20433	0.114019	10	HT115	M10.R10.E02	M10
Na22-01	VC20433	0.169066	17	NA22	M10.R17.E02	M10
Na22-02	VC20433	0.225701	18	NA22	M10.R18.E02	M10
Na22-03	VC20433	0.136336	19	NA22	M10.R19.E02	M10
Na22-04	VC20433	0.236959	20	NA22	M10.R20.E02	M10
Na22-05	VC20433	0.204128	21	NA22	M10.R21.E02	M10
Na22-06	VC20433	0.139989	22	NA22	M10.R22.E02	M10
Na22-07	VC20433	0.0281687	23	NA22	M10.R23.E02	M10
Na22-08	VC20433	0.280737	24	NA22	M10.R24.E02	M10
OP50-01	VC20433	-0.119918	11	OP50	M10.R11.E02	M10
OP50-02	VC20433	-0.0097662	12	OP50	M10.R12.E02	M10
OP50-03	VC20433	0.0483032	13	OP50	M10.R13.E02	M10
OP50-04	VC20433	0.218065	14	OP50	M10.R14.E02	M10
OP50-05	VC20433	-0.0136243	15	OP50	M10.R15.E02	M10
OP50-06	VC20433	-0.0332484	16	OP50	M10.R16.E02	M10
Na22-A1	VC20435	-0.331266	1	NA22	M1.R01.E05A.R01.E02	M1
Na22-A2	VC20435	-0.641191	2	NA22	M1.R01.E05A.R02.E02	M1
Na22-A3	VC20435	-0.641191	3	NA22	M1.R01.E05A.R03.E02	M1
Na22-A4	VC20435	-0.641191	4	NA22	M1.R01.E05A.R04.E02	M1
Na22-B5	VC20435	-0.549592	5	NA22	M1.R01.E05B.R01.E02	M1
Na22-B6	VC20435	-0.352177	6	NA22	M1.R01.E05B.R02.E02	M1
Na22-B7	VC20435	-0.385857	7	NA22	M1.R01.E05B.R03.E02	M1
Na22-B8	VC20435	-0.549592	8	NA22	M1.R01.E05B.R04.E02	M1
Na22-A2	VC20435	-0.370657	2	NA22	M3.10K.R02.E02A	M3
Na22-A5	VC20435	-0.432606	6	NA22	M3.10K.R05.E02A	M3
Na22-A7	VC20435	-0.436796	7	NA22	M3.10K.R07.E02A	M3
Na22-A8	VC20435	-0.165203	9	NA22	M3.10K.R08.E02A	M3
Na22-B1	VC20435	-0.62054	1	NA22	M3.10K.R01.E02B	M3
Na22-B2	VC20435	-0.3961	3	NA22	M3.10K.R02.E02B	M3
Na22-B3	VC20435	-0.498951	4	NA22	M3.10K.R03.E02B	M3
Na22-B4	VC20435	-0.437296	5	NA22	M3.10K.R04.E02B	M3
Na22-B7	VC20435	-0.256512	8	NA22	M3.10K.R07.E02B	M3
Na22-B8	VC20435	-0.145119	10	NA22	M3.10K.R08.E02B	M3
HT115-01	VC20437	-0.314724	1	HT115	M10.R01.E02	M10
HT115-02	VC20437	-0.394397	2	HT115	M10.R02.E02	M10
HT115-03	VC20437	-0.381282	3	HT115	M10.R03.E02	M10
HT115-04	VC20437	-0.425115	4	HT115	M10.R04.E02	M10
HT115-05	VC20437	-0.575308	5	HT115	M10.R05.E02	M10
HT115-06	VC20437	-0.410844	6	HT115	M10.R06.E02	M10
HT115-07	VC20437	-0.417899	7	HT115	M10.R07.E02	M10
HT115-08	VC20437	-0.386287	8	HT115	M10.R08.E02	M10
HT115-09	VC20437	-0.589897	9	HT115	M10.R09.E02	M10
HT115-10	VC20437	-0.447601	10	HT115	M10.R10.E02	M10
Na22-01	VC20437	-0.19794	17	NA22	M10.R17.E02	M10
Na22-02	VC20437	-0.398535	18	NA22	M10.R18.E02	M10
Na22-03	VC20437	-0.248738	19	NA22	M10.R19.E02	M10
Na22-04	VC20437	-0.266398	20	NA22	M10.R20.E02	M10
Na22-05	VC20437	-0.128232	21	NA22	M10.R21.E02	M10
Na22-06	VC20437	-0.125571	22	NA22	M10.R22.E02	M10
Na22-07	VC20437	-0.0580826	23	NA22	M10.R23.E02	M10
Na22-08	VC20437	-0.257642	24	NA22	M10.R24.E02	M10
OP50-01	VC20437	-0.57312	11	OP50	M10.R11.E02	M10
OP50-02	VC20437	-0.37255	12	OP50	M10.R12.E02	M10
OP50-03	VC20437	-0.291256	13	OP50	M10.R13.E02	M10
OP50-04	VC20437	-0.0632848	14	OP50	M10.R14.E02	M10
OP50-05	VC20437	-0.0166904	15	OP50	M10.R15.E02	M10
OP50-06	VC20437	-0.228594	16	OP50	M10.R16.E02	M10
HT115-01	VC20438	-0.409487	1	HT115	M10.R01.E02	M10
HT115-02	VC20438	-0.587193	2	HT115	M10.R02.E02	M10
HT115-03	VC20438	-0.462652	3	HT115	M10.R03.E02	M10
HT115-04	VC20438	-0.299504	4	HT115	M10.R04.E02	M10
HT115-05	VC20438	-0.267488	5	HT115	M10.R05.E02	M10
HT115-06	VC20438	-0.345076	6	HT115	M10.R06.E02	M10
HT115-07	VC20438	-0.427812	7	HT115	M10.R07.E02	M10
HT115-08	VC20438	-0.399919	8	HT115	M10.R08.E02	M10
HT115-09	VC20438	-0.471366	9	HT115	M10.R09.E02	M10
HT115-10	VC20438	-0.383101	10	HT115	M10.R10.E02	M10
Na22-01	VC20438	-0.445652	17	NA22	M10.R17.E02	M10
Na22-02	VC20438	-0.346678	18	NA22	M10.R18.E02	M10
Na22-03	VC20438	-0.124345	19	NA22	M10.R19.E02	M10
Na22-04	VC20438	-0.186954	20	NA22	M10.R20.E02	M10
Na22-05	VC20438	0.00345486	21	NA22	M10.R21.E02	M10
Na22-06	VC20438	0.0888848	22	NA22	M10.R22.E02	M10
Na22-07	VC20438	0.145553	23	NA22	M10.R23.E02	M10
Na22-08	VC20438	-0.0987805	24	NA22	M10.R24.E02	M10
OP50-01	VC20438	-0.519841	11	OP50	M10.R11.E02	M10
OP50-02	VC20438	-0.476142	12	OP50	M10.R12.E02	M10
OP50-03	VC20438	-0.29653	13	OP50	M10.R13.E02	M10
OP50-04	VC20438	-0.41001	14	OP50	M10.R14.E02	M10
OP50-05	VC20438	-0.411568	15	OP50	M10.R15.E02	M10
OP50-06	VC20438	-0.23539	16	OP50	M10.R16.E02	M10
HT115-01	VC20439	0.215457	1	HT115	M10.R01.E02	M10
HT115-02	VC20439	-0.00793441	2	HT115	M10.R02.E02	M10
HT115-03	VC20439	0.0137058	3	HT115	M10.R03.E02	M10
HT115-04	VC20439	-0.0747558	4	HT115	M10.R04.E02	M10
HT115-05	VC20439	0.0245664	5	HT115	M10.R05.E02	M10
HT115-06	VC20439	-0.0779591	6	HT115	M10.R06.E02	M10
HT115-07	VC20439	-0.153771	7	HT115	M10.R07.E02	M10
HT115-08	VC20439	0.00980858	8	HT115	M10.R08.E02	M10
HT115-09	VC20439	-0.143733	9	HT115	M10.R09.E02	M10
HT115-10	VC20439	-0.125267	10	HT115	M10.R10.E02	M10
Na22-01	VC20439	-0.358201	17	NA22	M10.R17.E02	M10
Na22-02	VC20439	-0.274462	18	NA22	M10.R18.E02	M10
Na22-03	VC20439	-0.251715	19	NA22	M10.R19.E02	M10
Na22-04	VC20439	-0.341244	20	NA22	M10.R20.E02	M10
Na22-05	VC20439	-0.401624	21	NA22	M10.R21.E02	M10
Na22-06	VC20439	-0.379117	22	NA22	M10.R22.E02	M10
Na22-07	VC20439	-0.38285	23	NA22	M10.R23.E02	M10
Na22-08	VC20439	-0.344181	24	NA22	M10.R24.E02	M10
OP50-01	VC20439	0.194576	11	OP50	M10.R11.E02	M10
OP50-02	VC20439	-0.116524	12	OP50	M10.R12.E02	M10
OP50-03	VC20439	-0.0467836	13	OP50	M10.R13.E02	M10
OP50-04	VC20439	-0.112687	14	OP50	M10.R14.E02	M10
OP50-05	VC20439	-0.296054	15	OP50	M10.R15.E02	M10
OP50-06	VC20439	0.0956863	16	OP50	M10.R16.E02	M10
Na22-A1	VC20444	-1.61409	1	NA22	M1.R01.E05A.R01.E02	M1
Na22-A2	VC20444	-1.61409	2	NA22	M1.R01.E05A.R02.E02	M1
Na22-A3	VC20444	-1.61409	3	NA22	M1.R01.E05A.R03.E02	M1
Na22-A4	VC20444	-1.61409	4	NA22	M1.R01.E05A.R04.E02	M1
Na22-B5	VC20444	-1.61409	5	NA22	M1.R01.E05B.R01.E02	M1
Na22-B6	VC20444	-1.61409	6	NA22	M1.R01.E05B.R02.E02	M1
Na22-B7	VC20444	-1.61409	7	NA22	M1.R01.E05B.R03.E02	M1
Na22-B8	VC20444	-1.61409	8	NA22	M1.R01.E05B.R04.E02	M1
Na22-A2	VC20444	-0.929599	2	NA22	M3.10K.R02.E02A	M3
Na22-A5	VC20444	-0.929599	6	NA22	M3.10K.R05.E02A	M3
Na22-A7	VC20444	-0.929599	7	NA22	M3.10K.R07.E02A	M3
Na22-A8	VC20444	-0.929599	9	NA22	M3.10K.R08.E02A	M3
Na22-B1	VC20444	-0.929599	1	NA22	M3.10K.R01.E02B	M3
Na22-B2	VC20444	-0.929599	3	NA22	M3.10K.R02.E02B	M3
Na22-B3	VC20444	-0.430683	4	NA22	M3.10K.R03.E02B	M3
Na22-B4	VC20444	-0.929599	5	NA22	M3.10K.R04.E02B	M3
Na22-B7	VC20444	-0.929599	8	NA22	M3.10K.R07.E02B	M3
Na22-B8	VC20444	-0.929599	10	NA22	M3.10K.R08.E02B	M3
HT115-01	VC20444	-0.351942	1	HT115	M07.R01.E03	M7
HT115-03	VC20444	-0.484487	3	HT115	M07.R03.E03	M7
HT115-04	VC20444	-0.61302	4	HT115	M07.R04.E03	M7
HT115-05	VC20444	-0.707738	5	HT115	M07.R05.E03	M7
HT115-06	VC20444	-0.437364	6	HT115	M07.R06.E03	M7
HT115-07	VC20444	-0.505409	7	HT115	M07.R07.E03	M7
HT115-08	VC20444	-1.26349	8	HT115	M07.R08.E03	M7
HT115-09	VC20444	-0.672214	9	HT115	M07.R09.E03	M7
HT115-10	VC20444	-0.579937	10	HT115	M07.R10.E03	M7
HT115-01	VC20444	-0.784946	1	HT115	M08.R01.E03	M8
HT115-02	VC20444	0.0163608	2	HT115	M08.R02.E03	M8
HT115-03	VC20444	0.0337121	3	HT115	M08.R03.E03	M8
HT115-04	VC20444	0.136985	4	HT115	M08.R04.E03	M8
HT115-05	VC20444	-0.0777867	5	HT115	M08.R05.E03	M8
HT115-06	VC20444	-0.13388	6	HT115	M08.R06.E03	M8
HT115-07	VC20444	-0.13491	7	HT115	M08.R07.E03	M8
HT115-08	VC20444	-0.214652	8	HT115	M08.R08.E03	M8
HT115-09	VC20444	-0.323538	9	HT115	M08.R09.E03	M8
HT115-10	VC20444	-0.606426	10	HT115	M08.R10.E03	M8
HT115-01	VC20446	-0.50387	1	HT115	M11.R01.E02	M11
HT115-02	VC20446	-0.612272	2	HT115	M11.R02.E02	M11
HT115-03	VC20446	-0.918368	3	HT115	M11.R03.E02	M11
HT115-04	VC20446	-0.941745	4	HT115	M11.R04.E02	M11
HT115-05	VC20446	-0.991215	5	HT115	M11.R05.E02	M11
HT115.liquid-01	VC20446	-0.673436	6	HT115	M11.R06.E02	M11
HT115.liquid-02	VC20446	-0.397439	7	HT115	M11.R07.E02	M11
HT115.liquid-03	VC20446	-0.491313	8	HT115	M11.R08.E02	M11
HT115.liquid-04	VC20446	-0.557034	9	HT115	M11.R09.E02	M11
HT115.liquid-05	VC20446	-0.576219	10	HT115	M11.R10.E02	M11
Na22-01	VC20446	-0.592521	17	NA22	M11.R17.E02	M11
Na22-02	VC20446	-0.57284	18	NA22	M11.R18.E02	M11
Na22-03	VC20446	-0.613423	19	NA22	M11.R19.E02	M11
Na22-04	VC20446	-0.445852	20	NA22	M11.R20.E02	M11
Na22.liquid-01	VC20446	-0.614519	21	NA22	M11.R21.E02	M11
Na22.liquid-02	VC20446	-0.439245	22	NA22	M11.R22.E02	M11
Na22.liquid-03	VC20446	-1.13209	23	NA22	M11.R23.E02	M11
Na22.liquid-04	VC20446	-0.682572	24	NA22	M11.R24.E02	M11
OP50-01	VC20446	-0.682678	11	OP50	M11.R11.E02	M11
OP50-02	VC20446	-0.670346	12	OP50	M11.R12.E02	M11
OP50-03	VC20446	-0.976589	13	OP50	M11.R13.E02	M11
OP50-04	VC20446	-0.924039	14	OP50	M11.R14.E02	M11
OP50-05	VC20446	-0.696389	15	OP50	M11.R15.E02	M11
OP50-06	VC20446	-1.08831	16	OP50	M11.R16.E02	M11
HT115-01	VC20448	-0.414209	1	HT115	M11.R01.E02	M11
HT115-02	VC20448	-0.502863	2	HT115	M11.R02.E02	M11
HT115-03	VC20448	-0.424536	3	HT115	M11.R03.E02	M11
HT115-04	VC20448	-0.521415	4	HT115	M11.R04.E02	M11
HT115-05	VC20448	-0.484546	5	HT115	M11.R05.E02	M11
HT115.liquid-01	VC20448	-0.354889	6	HT115	M11.R06.E02	M11
HT115.liquid-02	VC20448	-0.275694	7	HT115	M11.R07.E02	M11
HT115.liquid-03	VC20448	-0.342691	8	HT115	M11.R08.E02	M11
HT115.liquid-04	VC20448	-0.492122	9	HT115	M11.R09.E02	M11
HT115.liquid-05	VC20448	-0.368721	10	HT115	M11.R10.E02	M11
Na22-01	VC20448	-0.554289	17	NA22	M11.R17.E02	M11
Na22-02	VC20448	-0.357345	18	NA22	M11.R18.E02	M11
Na22-03	VC20448	-0.566955	19	NA22	M11.R19.E02	M11
Na22-04	VC20448	-0.578925	20	NA22	M11.R20.E02	M11
Na22.liquid-01	VC20448	-0.363014	21	NA22	M11.R21.E02	M11
Na22.liquid-02	VC20448	-0.404637	22	NA22	M11.R22.E02	M11
Na22.liquid-03	VC20448	-0.550946	23	NA22	M11.R23.E02	M11
Na22.liquid-04	VC20448	-0.535341	24	NA22	M11.R24.E02	M11
OP50-01	VC20448	-0.493885	11	OP50	M11.R11.E02	M11
OP50-02	VC20448	-0.403436	12	OP50	M11.R12.E02	M11
OP50-03	VC20448	-0.590293	13	OP50	M11.R13.E02	M11
OP50-04	VC20448	-0.519078	14	OP50	M11.R14.E02	M11
OP50-05	VC20448	-0.720667	15	OP50	M11.R15.E02	M11
OP50-06	VC20448	-0.525917	16	OP50	M11.R16.E02	M11
HT115-01	VC20452	-0.310512	1	HT115	M11.R01.E02	M11
HT115-02	VC20452	-0.316236	2	HT115	M11.R02.E02	M11
HT115-03	VC20452	-0.378084	3	HT115	M11.R03.E02	M11
HT115-04	VC20452	-0.339627	4	HT115	M11.R04.E02	M11
HT115-05	VC20452	-0.312589	5	HT115	M11.R05.E02	M11
HT115.liquid-01	VC20452	-0.172232	6	HT115	M11.R06.E02	M11
HT115.liquid-02	VC20452	-0.364302	7	HT115	M11.R07.E02	M11
HT115.liquid-03	VC20452	-0.126679	8	HT115	M11.R08.E02	M11
HT115.liquid-04	VC20452	-0.448765	9	HT115	M11.R09.E02	M11
HT115.liquid-05	VC20452	-0.0860281	10	HT115	M11.R10.E02	M11
Na22-01	VC20452	-0.21137	17	NA22	M11.R17.E02	M11
Na22-02	VC20452	0.0398919	18	NA22	M11.R18.E02	M11
Na22-03	VC20452	0.093888	19	NA22	M11.R19.E02	M11
Na22-04	VC20452	0.139475	20	NA22	M11.R20.E02	M11
Na22.liquid-01	VC20452	-0.120562	21	NA22	M11.R21.E02	M11
Na22.liquid-02	VC20452	-0.0215289	22	NA22	M11.R22.E02	M11
Na22.liquid-03	VC20452	-0.316847	23	NA22	M11.R23.E02	M11
Na22.liquid-04	VC20452	-0.298368	24	NA22	M11.R24.E02	M11
OP50-01	VC20452	-0.0192764	11	OP50	M11.R11.E02	M11
OP50-02	VC20452	-0.0166268	12	OP50	M11.R12.E02	M11
OP50-03	VC20452	-0.375069	13	OP50	M11.R13.E02	M11
OP50-04	VC20452	-0.523674	14	OP50	M11.R14.E02	M11
OP50-05	VC20452	-0.28792	15	OP50	M11.R15.E02	M11
OP50-06	VC20452	-0.15657	16	OP50	M11.R16.E02	M11
HT115-01	VC20460	-1.04944	1	HT115	M10.R01.E02	M10
HT115-02	VC20460	-1.426	2	HT115	M10.R02.E02	M10
HT115-03	VC20460	-1.41488	3	HT115	M10.R03.E02	M10
HT115-04	VC20460	-0.913016	4	HT115	M10.R04.E02	M10
HT115-05	VC20460	-0.971766	5	HT115	M10.R05.E02	M10
HT115-06	VC20460	-0.908856	6	HT115	M10.R06.E02	M10
HT115-07	VC20460	-0.982015	7	HT115	M10.R07.E02	M10
HT115-08	VC20460	-1.4462	8	HT115	M10.R08.E02	M10
HT115-09	VC20460	-1.02371	9	HT115	M10.R09.E02	M10
HT115-10	VC20460	-0.765119	10	HT115	M10.R10.E02	M10
Na22-01	VC20460	-1.42976	17	NA22	M10.R17.E02	M10
Na22-02	VC20460	-1.5	18	NA22	M10.R18.E02	M10
Na22-03	VC20460	-0.930659	19	NA22	M10.R19.E02	M10
Na22-04	VC20460	-0.952112	20	NA22	M10.R20.E02	M10
Na22-05	VC20460	-1.5721	21	NA22	M10.R21.E02	M10
Na22-06	VC20460	-1.55501	22	NA22	M10.R22.E02	M10
Na22-07	VC20460	-0.934124	23	NA22	M10.R23.E02	M10
Na22-08	VC20460	-0.878218	24	NA22	M10.R24.E02	M10
OP50-01	VC20460	-1.77567	11	OP50	M10.R11.E02	M10
OP50-02	VC20460	-1.49904	12	OP50	M10.R12.E02	M10
OP50-03	VC20460	-1.12771	13	OP50	M10.R13.E02	M10
OP50-04	VC20460	-1.08737	14	OP50	M10.R14.E02	M10
OP50-05	VC20460	-1.18216	15	OP50	M10.R15.E02	M10
OP50-06	VC20460	-1.2578	16	OP50	M10.R16.E02	M10
HT115-01	VC20460	-1.48617	1	HT115	M11.R01.E02	M11
HT115-02	VC20460	-1.10701	2	HT115	M11.R02.E02	M11
HT115-03	VC20460	-0.801814	3	HT115	M11.R03.E02	M11
HT115-04	VC20460	-0.978571	4	HT115	M11.R04.E02	M11
HT115-05	VC20460	-1.01782	5	HT115	M11.R05.E02	M11
HT115.liquid-01	VC20460	-0.829169	6	HT115	M11.R06.E02	M11
HT115.liquid-02	VC20460	-0.671652	7	HT115	M11.R07.E02	M11
HT115.liquid-03	VC20460	-0.687128	8	HT115	M11.R08.E02	M11
HT115.liquid-04	VC20460	-1.06794	9	HT115	M11.R09.E02	M11
HT115.liquid-05	VC20460	-0.750288	10	HT115	M11.R10.E02	M11
Na22-01	VC20460	-1.57537	17	NA22	M11.R17.E02	M11
Na22-02	VC20460	-1.0764	18	NA22	M11.R18.E02	M11
Na22-03	VC20460	-1.14448	19	NA22	M11.R19.E02	M11
Na22-04	VC20460	-1.11473	20	NA22	M11.R20.E02	M11
Na22.liquid-01	VC20460	-0.851637	21	NA22	M11.R21.E02	M11
Na22.liquid-02	VC20460	-1.09404	22	NA22	M11.R22.E02	M11
Na22.liquid-03	VC20460	-0.833965	23	NA22	M11.R23.E02	M11
Na22.liquid-04	VC20460	-0.743468	24	NA22	M11.R24.E02	M11
OP50-01	VC20460	-1.10949	11	OP50	M11.R11.E02	M11
OP50-02	VC20460	-0.998616	12	OP50	M11.R12.E02	M11
OP50-03	VC20460	-1.11484	13	OP50	M11.R13.E02	M11
OP50-04	VC20460	-1.01432	14	OP50	M11.R14.E02	M11
OP50-05	VC20460	-0.747795	15	OP50	M11.R15.E02	M11
OP50-06	VC20460	-0.775408	16	OP50	M11.R16.E02	M11
Na22-A1	VC20461	-0.5223	1	NA22	M1.R01.E05A.R01.E02	M1
Na22-A2	VC20461	-0.60935	2	NA22	M1.R01.E05A.R02.E02	M1
Na22-A3	VC20461	-0.5223	3	NA22	M1.R01.E05A.R03.E02	M1
Na22-A4	VC20461	-0.60935	4	NA22	M1.R01.E05A.R04.E02	M1
Na22-B5	VC20461	-1.2187	5	NA22	M1.R01.E05B.R01.E02	M1
Na22-B6	VC20461	-1.2187	6	NA22	M1.R01.E05B.R02.E02	M1
Na22-B7	VC20461	-1.2187	7	NA22	M1.R01.E05B.R03.E02	M1
Na22-B8	VC20461	-1.2187	8	NA22	M1.R01.E05B.R04.E02	M1
Na22-A2	VC20461	-0.691638	2	NA22	M3.10K.R02.E02A	M3
Na22-A5	VC20461	-0.462615	6	NA22	M3.10K.R05.E02A	M3
Na22-A7	VC20461	-0.580309	7	NA22	M3.10K.R07.E02A	M3
Na22-A8	VC20461	-0.642932	9	NA22	M3.10K.R08.E02A	M3
Na22-B1	VC20461	-0.618097	1	NA22	M3.10K.R01.E02B	M3
Na22-B2	VC20461	-0.536688	3	NA22	M3.10K.R02.E02B	M3
Na22-B3	VC20461	-0.537426	4	NA22	M3.10K.R03.E02B	M3
Na22-B4	VC20461	-0.630767	5	NA22	M3.10K.R04.E02B	M3
Na22-B7	VC20461	-0.537392	8	NA22	M3.10K.R07.E02B	M3
Na22-B8	VC20461	-0.644032	10	NA22	M3.10K.R08.E02B	M3
HT115-01	VC20463	-0.182117	1	HT115	M11.R01.E02	M11
HT115-02	VC20463	-0.461093	2	HT115	M11.R02.E02	M11
HT115-03	VC20463	-0.368448	3	HT115	M11.R03.E02	M11
HT115-04	VC20463	-0.38686	4	HT115	M11.R04.E02	M11
HT115-05	VC20463	-0.268964	5	HT115	M11.R05.E02	M11
HT115.liquid-01	VC20463	-0.189795	6	HT115	M11.R06.E02	M11
HT115.liquid-02	VC20463	-0.270777	7	HT115	M11.R07.E02	M11
HT115.liquid-03	VC20463	-0.215351	8	HT115	M11.R08.E02	M11
HT115.liquid-04	VC20463	-0.299082	9	HT115	M11.R09.E02	M11
HT115.liquid-05	VC20463	-0.122416	10	HT115	M11.R10.E02	M11
Na22-01	VC20463	-0.237371	17	NA22	M11.R17.E02	M11
Na22-02	VC20463	-0.509976	18	NA22	M11.R18.E02	M11
Na22-03	VC20463	-0.196855	19	NA22	M11.R19.E02	M11
Na22-04	VC20463	-0.0350319	20	NA22	M11.R20.E02	M11
Na22.liquid-01	VC20463	-0.218426	21	NA22	M11.R21.E02	M11
Na22.liquid-02	VC20463	-0.347661	22	NA22	M11.R22.E02	M11
Na22.liquid-03	VC20463	-0.288698	23	NA22	M11.R23.E02	M11
Na22.liquid-04	VC20463	-0.358528	24	NA22	M11.R24.E02	M11
OP50-01	VC20463	-0.260963	11	OP50	M11.R11.E02	M11
OP50-02	VC20463	-0.117886	12	OP50	M11.R12.E02	M11
OP50-03	VC20463	-0.37061	13	OP50	M11.R13.E02	M11
OP50-04	VC20463	-0.435166	14	OP50	M11.R14.E02	M11
OP50-05	VC20463	-0.0463349	15	OP50	M11.R15.E02	M11
OP50-06	VC20463	-0.350818	16	OP50	M11.R16.E02	M11
HT115-01	VC20465	-0.482964	1	HT115	M11.R01.E02	M11
HT115-02	VC20465	-0.625925	2	HT115	M11.R02.E02	M11
HT115-03	VC20465	-0.459409	3	HT115	M11.R03.E02	M11
HT115-04	VC20465	-0.541484	4	HT115	M11.R04.E02	M11
HT115-05	VC20465	-0.505852	5	HT115	M11.R05.E02	M11
HT115.liquid-01	VC20465	-0.262044	6	HT115	M11.R06.E02	M11
HT115.liquid-02	VC20465	-0.29261	7	HT115	M11.R07.E02	M11
HT115.liquid-03	VC20465	-0.496397	8	HT115	M11.R08.E02	M11
HT115.liquid-04	VC20465	-0.489896	9	HT115	M11.R09.E02	M11
HT115.liquid-05	VC20465	-0.497042	10	HT115	M11.R10.E02	M11
Na22-01	VC20465	-0.527494	17	NA22	M11.R17.E02	M11
Na22-02	VC20465	-0.502132	18	NA22	M11.R18.E02	M11
Na22-03	VC20465	-0.353818	19	NA22	M11.R19.E02	M11
Na22-04	VC20465	-0.452337	20	NA22	M11.R20.E02	M11
Na22.liquid-01	VC20465	-0.199925	21	NA22	M11.R21.E02	M11
Na22.liquid-02	VC20465	-0.253509	22	NA22	M11.R22.E02	M11
Na22.liquid-03	VC20465	-0.165201	23	NA22	M11.R23.E02	M11
Na22.liquid-04	VC20465	-0.4986	24	NA22	M11.R24.E02	M11
OP50-01	VC20465	-0.498757	11	OP50	M11.R11.E02	M11
OP50-02	VC20465	-0.309891	12	OP50	M11.R12.E02	M11
OP50-03	VC20465	-0.288505	13	OP50	M11.R13.E02	M11
OP50-04	VC20465	-0.53617	14	OP50	M11.R14.E02	M11
OP50-05	VC20465	-0.203654	15	OP50	M11.R15.E02	M11
OP50-06	VC20465	-0.0718184	16	OP50	M11.R16.E02	M11
HT115-01	VC20471	-0.834316	1	HT115	M11.R01.E02	M11
HT115-02	VC20471	-0.693894	2	HT115	M11.R02.E02	M11
HT115-03	VC20471	-0.656809	3	HT115	M11.R03.E02	M11
HT115-04	VC20471	-0.989192	4	HT115	M11.R04.E02	M11
HT115-05	VC20471	-0.703441	5	HT115	M11.R05.E02	M11
HT115.liquid-01	VC20471	-0.530297	6	HT115	M11.R06.E02	M11
HT115.liquid-02	VC20471	-0.590197	7	HT115	M11.R07.E02	M11
HT115.liquid-03	VC20471	-0.345248	8	HT115	M11.R08.E02	M11
HT115.liquid-04	VC20471	-0.680136	9	HT115	M11.R09.E02	M11
HT115.liquid-05	VC20471	-0.640876	10	HT115	M11.R10.E02	M11
Na22-01	VC20471	-0.537907	17	NA22	M11.R17.E02	M11
Na22-02	VC20471	-0.498301	18	NA22	M11.R18.E02	M11
Na22-03	VC20471	-0.460757	19	NA22	M11.R19.E02	M11
Na22-04	VC20471	-0.61301	20	NA22	M11.R20.E02	M11
Na22.liquid-01	VC20471	-0.404189	21	NA22	M11.R21.E02	M11
Na22.liquid-02	VC20471	-0.528696	22	NA22	M11.R22.E02	M11
Na22.liquid-03	VC20471	-0.631481	23	NA22	M11.R23.E02	M11
Na22.liquid-04	VC20471	-0.568551	24	NA22	M11.R24.E02	M11
OP50-01	VC20471	-0.26703	11	OP50	M11.R11.E02	M11
OP50-02	VC20471	-0.616053	12	OP50	M11.R12.E02	M11
OP50-03	VC20471	-0.920909	13	OP50	M11.R13.E02	M11
OP50-04	VC20471	-0.905199	14	OP50	M11.R14.E02	M11
OP50-05	VC20471	-0.544578	15	OP50	M11.R15.E02	M11
OP50-06	VC20471	-0.619748	16	OP50	M11.R16.E02	M11
HT115-01	VC20472	-0.417979	1	HT115	M10.R01.E02	M10
HT115-02	VC20472	-0.484988	2	HT115	M10.R02.E02	M10
HT115-03	VC20472	-0.377617	3	HT115	M10.R03.E02	M10
HT115-04	VC20472	-0.464204	4	HT115	M10.R04.E02	M10
HT115-05	VC20472	-0.307371	5	HT115	M10.R05.E02	M10
HT115-06	VC20472	-0.1799	6	HT115	M10.R06.E02	M10
HT115-07	VC20472	-0.439084	7	HT115	M10.R07.E02	M10
HT115-08	VC20472	-0.538597	8	HT115	M10.R08.E02	M10
HT115-09	VC20472	-0.450311	9	HT115	M10.R09.E02	M10
HT115-10	VC20472	-0.391049	10	HT115	M10.R10.E02	M10
Na22-01	VC20472	-0.495362	17	NA22	M10.R17.E02	M10
Na22-02	VC20472	-0.63276	18	NA22	M10.R18.E02	M10
Na22-03	VC20472	-0.419353	19	NA22	M10.R19.E02	M10
Na22-04	VC20472	-0.427559	20	NA22	M10.R20.E02	M10
Na22-05	VC20472	-0.374461	21	NA22	M10.R21.E02	M10
Na22-06	VC20472	-0.690634	22	NA22	M10.R22.E02	M10
Na22-07	VC20472	-0.43535	23	NA22	M10.R23.E02	M10
Na22-08	VC20472	-0.486659	24	NA22	M10.R24.E02	M10
OP50-01	VC20472	-0.527862	11	OP50	M10.R11.E02	M10
OP50-02	VC20472	-0.467975	12	OP50	M10.R12.E02	M10
OP50-03	VC20472	-0.539316	13	OP50	M10.R13.E02	M10
OP50-04	VC20472	-0.649501	14	OP50	M10.R14.E02	M10
OP50-05	VC20472	-0.542431	15	OP50	M10.R15.E02	M10
OP50-06	VC20472	-0.475798	16	OP50	M10.R16.E02	M10
HT115-01	VC20472	-0.703898	1	HT115	M11.R01.E02	M11
HT115-02	VC20472	-0.557287	2	HT115	M11.R02.E02	M11
HT115-03	VC20472	-0.563087	3	HT115	M11.R03.E02	M11
HT115-04	VC20472	-0.507161	4	HT115	M11.R04.E02	M11
HT115-05	VC20472	-0.494334	5	HT115	M11.R05.E02	M11
HT115.liquid-01	VC20472	-0.307387	6	HT115	M11.R06.E02	M11
HT115.liquid-02	VC20472	-0.593285	7	HT115	M11.R07.E02	M11
HT115.liquid-03	VC20472	-0.24533	8	HT115	M11.R08.E02	M11
HT115.liquid-04	VC20472	-0.466709	9	HT115	M11.R09.E02	M11
HT115.liquid-05	VC20472	-0.401507	10	HT115	M11.R10.E02	M11
Na22-01	VC20472	-0.397084	17	NA22	M11.R17.E02	M11
Na22-02	VC20472	-0.477036	18	NA22	M11.R18.E02	M11
Na22-03	VC20472	-0.370685	19	NA22	M11.R19.E02	M11
Na22-04	VC20472	-0.3828	20	NA22	M11.R20.E02	M11
Na22.liquid-01	VC20472	-0.523178	21	NA22	M11.R21.E02	M11
Na22.liquid-02	VC20472	-0.776548	22	NA22	M11.R22.E02	M11
Na22.liquid-03	VC20472	-0.640458	23	NA22	M11.R23.E02	M11
Na22.liquid-04	VC20472	-0.462191	24	NA22	M11.R24.E02	M11
OP50-01	VC20472	-0.378296	11	OP50	M11.R11.E02	M11
OP50-02	VC20472	-0.259267	12	OP50	M11.R12.E02	M11
OP50-03	VC20472	-0.737645	13	OP50	M11.R13.E02	M11
OP50-04	VC20472	-0.762218	14	OP50	M11.R14.E02	M11
OP50-05	VC20472	-0.465091	15	OP50	M11.R15.E02	M11
OP50-06	VC20472	-0.547362	16	OP50	M11.R16.E02	M11
HT115-01	VC20473	0.330692	1	HT115	M10.R01.E02	M10
HT115-02	VC20473	0.631598	2	HT115	M10.R02.E02	M10
HT115-03	VC20473	0.441599	3	HT115	M10.R03.E02	M10
HT115-04	VC20473	0.402924	4	HT115	M10.R04.E02	M10
HT115-05	VC20473	0.298984	5	HT115	M10.R05.E02	M10
HT115-06	VC20473	0.205072	6	HT115	M10.R06.E02	M10
HT115-07	VC20473	0.24148	7	HT115	M10.R07.E02	M10
HT115-08	VC20473	0.304635	8	HT115	M10.R08.E02	M10
HT115-09	VC20473	0.0804776	9	HT115	M10.R09.E02	M10
HT115-10	VC20473	0.138964	10	HT115	M10.R10.E02	M10
Na22-01	VC20473	0.05051	17	NA22	M10.R17.E02	M10
Na22-02	VC20473	-0.0824699	18	NA22	M10.R18.E02	M10
Na22-03	VC20473	-0.244042	19	NA22	M10.R19.E02	M10
Na22-04	VC20473	-0.0794599	20	NA22	M10.R20.E02	M10
Na22-05	VC20473	0.199537	21	NA22	M10.R21.E02	M10
Na22-06	VC20473	0.0613327	22	NA22	M10.R22.E02	M10
Na22-07	VC20473	-0.0366186	23	NA22	M10.R23.E02	M10
Na22-08	VC20473	-0.431948	24	NA22	M10.R24.E02	M10
OP50-01	VC20473	0.205404	11	OP50	M10.R11.E02	M10
OP50-02	VC20473	-0.152786	12	OP50	M10.R12.E02	M10
OP50-03	VC20473	-0.147271	13	OP50	M10.R13.E02	M10
OP50-04	VC20473	-0.318845	14	OP50	M10.R14.E02	M10
OP50-05	VC20473	-0.399598	15	OP50	M10.R15.E02	M10
OP50-06	VC20473	-1.11427	16	OP50	M10.R16.E02	M10
HT115-01	VC20474	-0.563328	1	HT115	M10.R01.E02	M10
HT115-02	VC20474	-0.527242	2	HT115	M10.R02.E02	M10
HT115-03	VC20474	-0.522474	3	HT115	M10.R03.E02	M10
HT115-04	VC20474	-0.398953	4	HT115	M10.R04.E02	M10
HT115-05	VC20474	-0.514242	5	HT115	M10.R05.E02	M10
HT115-06	VC20474	-0.468242	6	HT115	M10.R06.E02	M10
HT115-07	VC20474	-0.476183	7	HT115	M10.R07.E02	M10
HT115-08	VC20474	-0.493172	8	HT115	M10.R08.E02	M10
HT115-09	VC20474	-0.467234	9	HT115	M10.R09.E02	M10
HT115-10	VC20474	-0.74627	10	HT115	M10.R10.E02	M10
Na22-01	VC20474	-0.485727	17	NA22	M10.R17.E02	M10
Na22-02	VC20474	-0.374199	18	NA22	M10.R18.E02	M10
Na22-03	VC20474	-0.483403	19	NA22	M10.R19.E02	M10
Na22-04	VC20474	-0.476631	20	NA22	M10.R20.E02	M10
Na22-05	VC20474	-0.43306	21	NA22	M10.R21.E02	M10
Na22-06	VC20474	-0.437326	22	NA22	M10.R22.E02	M10
Na22-07	VC20474	-0.588361	23	NA22	M10.R23.E02	M10
Na22-08	VC20474	-0.742424	24	NA22	M10.R24.E02	M10
OP50-01	VC20474	-0.613222	11	OP50	M10.R11.E02	M10
OP50-02	VC20474	-0.614385	12	OP50	M10.R12.E02	M10
OP50-03	VC20474	-0.519267	13	OP50	M10.R13.E02	M10
OP50-04	VC20474	-0.75085	14	OP50	M10.R14.E02	M10
OP50-05	VC20474	-0.764738	15	OP50	M10.R15.E02	M10
OP50-06	VC20474	-0.495766	16	OP50	M10.R16.E02	M10
HT115-01	VC20475	-0.332067	1	HT115	M10.R01.E02	M10
HT115-02	VC20475	-0.326162	2	HT115	M10.R02.E02	M10
HT115-03	VC20475	-0.193403	3	HT115	M10.R03.E02	M10
HT115-04	VC20475	-0.478517	4	HT115	M10.R04.E02	M10
HT115-05	VC20475	-0.349044	5	HT115	M10.R05.E02	M10
HT115-06	VC20475	-0.242661	6	HT115	M10.R06.E02	M10
HT115-07	VC20475	-0.262994	7	HT115	M10.R07.E02	M10
HT115-08	VC20475	-0.264182	8	HT115	M10.R08.E02	M10
HT115-09	VC20475	-0.21985	9	HT115	M10.R09.E02	M10
HT115-10	VC20475	-0.155964	10	HT115	M10.R10.E02	M10
Na22-01	VC20475	-0.524095	17	NA22	M10.R17.E02	M10
Na22-02	VC20475	-1.19921	18	NA22	M10.R18.E02	M10
Na22-03	VC20475	-0.685052	19	NA22	M10.R19.E02	M10
Na22-04	VC20475	-0.814698	20	NA22	M10.R20.E02	M10
Na22-05	VC20475	-0.60538	21	NA22	M10.R21.E02	M10
Na22-06	VC20475	-0.803768	22	NA22	M10.R22.E02	M10
Na22-07	VC20475	-0.746351	23	NA22	M10.R23.E02	M10
Na22-08	VC20475	-0.637806	24	NA22	M10.R24.E02	M10
OP50-01	VC20475	-0.548304	11	OP50	M10.R11.E02	M10
OP50-02	VC20475	-1.22027	12	OP50	M10.R12.E02	M10
OP50-03	VC20475	-0.532212	13	OP50	M10.R13.E02	M10
OP50-04	VC20475	-0.767126	14	OP50	M10.R14.E02	M10
OP50-05	VC20475	-0.597695	15	OP50	M10.R15.E02	M10
OP50-06	VC20475	-0.872412	16	OP50	M10.R16.E02	M10
HT115-01	VC20475	-0.584572	1	HT115	M11.R01.E02	M11
HT115-02	VC20475	-0.521362	2	HT115	M11.R02.E02	M11
HT115-03	VC20475	-0.579422	3	HT115	M11.R03.E02	M11
HT115-04	VC20475	-0.641889	4	HT115	M11.R04.E02	M11
HT115-05	VC20475	-0.576178	5	HT115	M11.R05.E02	M11
HT115.liquid-01	VC20475	-0.0479066	6	HT115	M11.R06.E02	M11
HT115.liquid-02	VC20475	-0.0422342	7	HT115	M11.R07.E02	M11
HT115.liquid-03	VC20475	0.0288043	8	HT115	M11.R08.E02	M11
HT115.liquid-04	VC20475	-0.050745	9	HT115	M11.R09.E02	M11
HT115.liquid-05	VC20475	0.0160212	10	HT115	M11.R10.E02	M11
[truncated: 2,732 more rows]

## Sheet: FCR.stats.by.pool
strain	mean.FCR	FCR.SD	num.reps	pool	start.pop	lower.CL	upper.CL
VC20152	0.198381	0.0904906	8	M1	0.0389427	0.122729	0.274033
VC20496	-0.340837	0.0911022	8	M1	0.0164797	-0.417	-0.264674
VC40870	-0.667575	0.185409	8	M1	0.0296047	-0.822581	-0.512568
VC20684	-0.313736	0.0767511	8	M1	0.0445671	-0.377901	-0.24957
VC20738	-1.89793	0	8	M1	0.0138888	-1.89793	-1.89793
VC40154	-0.798118	0.284408	8	M1	0.00437206	-1.03589	-0.560347
VC40719	-0.453442	0.0850559	8	M1	0.0562618	-0.52455	-0.382333
VC40687	0.340203	0.0358452	8	M1	0.110159	0.310235	0.37017
VC40632	-1.04004	0	8	M1	0.00869468	-1.04004	-1.04004
VC40721	-1.13466	0	8	M1	0.00482096	-1.13466	-1.13466
VC40529	-0.915651	0	8	M1	0.00355858	-0.915651	-0.915651
VC20263	-1.49027	0	8	M1	0.00789283	-1.49027	-1.49027
VC20110	-0.0731203	0.104422	8	M1	0.0523614	-0.160419	0.0141789
VC20492	-0.329542	0.067539	8	M1	0.0260649	-0.386006	-0.273078
VC40238	-0.646304	0.0781178	8	M1	0.0127128	-0.711612	-0.580996
VC20461	-0.892262	0.350524	8	M1	0.0126065	-1.18531	-0.599217
VC40174	-0.761318	0	8	M1	0.00287316	-0.761318	-0.761318
VC20649	-0.427992	0.0517308	8	M1	0.00538574	-0.47124	-0.384744
VC40250	-0.988455	0	8	M1	0.00781024	-0.988455	-0.988455
VC20555	-0.976587	0	8	M1	0.00761985	-0.976587	-0.976587
VC40138	-1.41987	0.303582	8	M1	0.0106125	-1.67368	-1.16607
VC20647	-0.336824	0.134546	8	M1	0.0513756	-0.449307	-0.22434
VC20172	-0.263611	0.0921455	8	M1	0.0759826	-0.340646	-0.186575
VC20293	-1.07568	0	8	M1	0.0197357	-1.07568	-1.07568
VC10128	-0.244586	0.0757031	8	M1	0.104537	-0.307875	-0.181297
VC20444	-1.61409	0	8	M1	0.00306118	-1.61409	-1.61409
VC40575	-0.896089	0.242636	8	M1	0.0221342	-1.09894	-0.69324
VC20136	-0.277467	0.0900854	8	M1	0.0271906	-0.35278	-0.202154
VC40542	-0.582466	0.187027	8	M1	0.0135424	-0.738825	-0.426107
VC20435	-0.511507	0.134704	8	M1	0.0143915	-0.624122	-0.398892
VC30220	-1.52715	0	8	M1	0.00288216	-1.52715	-1.52715
VC40846	-0.968914	0.147973	8	M1	0.0100004	-1.09262	-0.845206
VC40766	-0.887415	0	8	M1	0.00342197	-0.887415	-0.887415
VC40033	0.25613	0.0752952	8	M1	0.0291209	0.193182	0.319078
VC40764	-1.46069	0.223078	8	M1	0.0321798	-1.64719	-1.27419
VC30112	-0.682904	0	8	M1	0.00257721	-0.682904	-0.682904
VC20704	-0.0296597	0.0554698	8	M1	0.0540179	-0.0760336	0.0167143
VC20413	-0.421045	0.0924449	8	M1	0.0148176	-0.498331	-0.343759
VC20732	-0.860461	0.229968	8	M1	0.00936144	-1.05272	-0.668203
VC20233	-1.12792	0	8	M1	0.0104379	-1.12792	-1.12792
VC20486	-0.967699	0.258629	8	M1	0.0123708	-1.18392	-0.75148
VC20608	-1.15388	0	8	M1	0.00495111	-1.15388	-1.15388
VC40632	-0.280902	0.0905422	10	M3	0.00609308	-0.345672	-0.216132
VC40719	-0.618909	0.137693	10	M3	0.0518962	-0.717409	-0.52041
VC20496	-0.305335	0.132299	10	M3	0.0143398	-0.399976	-0.210694
VC40687	0.0906301	0.0937328	10	M3	0.0680353	0.0235776	0.157682
VC20263	-1.63197	0	10	M3	0.00309935	-1.63197	-1.63197
VC20110	-0.213558	0.0895928	10	M3	0.0637487	-0.277649	-0.149467
VC20617	-1.0228	0.232598	10	M3	0.00500681	-1.18919	-0.856407
VC20684	-0.229581	0.113171	10	M3	0.0602398	-0.310539	-0.148624
VC20738	-1.32541	0.441242	10	M3	0.0284727	-1.64106	-1.00977
VC40870	-0.518201	0.144431	10	M3	0.057176	-0.621521	-0.414882
VC20492	-0.30241	0.0492781	10	M3	0.0148424	-0.337662	-0.267159
VC20608	-0.801623	0.143415	10	M3	0.00343756	-0.904216	-0.69903
VC40575	-0.461108	0.0572622	10	M3	0.0185756	-0.502071	-0.420145
VC20152	0.192366	0.0439265	10	M3	0.0840811	0.160943	0.223789
VC20555	-0.927202	0.300846	10	M3	0.00908082	-1.14241	-0.71199
VC20444	-0.898612	0.0979883	10	M3	0.00362806	-0.968709	-0.828516
VC20239	-1.30293	0.196202	10	M3	0.00692589	-1.44329	-1.16258
VC10128	-0.0719012	0.125041	10	M3	0.0556661	-0.16135	0.0175477
VC20019	0.0997105	0.126575	10	M3	0.0119332	0.00916443	0.190257
VC40529	-1.12893	0.315275	10	M3	0.0066201	-1.35447	-0.903399
VC20647	-0.0745832	0.126488	10	M3	0.0211954	-0.165067	0.015901
VC20486	-0.459246	0.08099	10	M3	0.0187597	-0.517183	-0.401309
VC40764	-1.00403	0.218076	10	M3	0.0122704	-1.16003	-0.848023
VC20136	-0.192039	0.102257	10	M3	0.0257563	-0.265189	-0.11889
VC40238	-0.620515	0.127895	10	M3	0.0214341	-0.712006	-0.529024
VC40138	-0.733655	0.110477	10	M3	0.00297341	-0.812686	-0.654624
VC40154	-0.995081	0.237686	10	M3	0.0139219	-1.16511	-0.825051
VC40542	-0.248208	0.128475	10	M3	0.0223955	-0.340113	-0.156302
VC20435	-0.375978	0.148334	10	M3	0.0455283	-0.482089	-0.269866
VC20413	-0.384547	0.0853311	10	M3	0.022637	-0.445589	-0.323505
VC40033	0.319998	0.0353841	10	M3	0.0574737	0.294685	0.34531
VC20649	-0.34942	0.0970402	10	M3	0.034648	-0.418839	-0.280002
VC20233	-0.265989	0.055978	10	M3	0.00427683	-0.306033	-0.225944
VC20732	-0.357655	0.115922	10	M3	0.0129421	-0.44058	-0.274729
VC20172	-0.26567	0.127085	10	M3	0.023147	-0.356581	-0.174759
VC20461	-0.58819	0.0692539	10	M3	0.0106843	-0.637731	-0.538648
VC20704	-0.0686387	0.153	10	M3	0.0516767	-0.178089	0.0408112
VC40766	-0.701352	0.125476	10	M3	0.0029456	-0.791112	-0.611592
VC40250	-0.645803	0.125653	10	M3	0.0179143	-0.73569	-0.555916
VC40846	-0.490468	0.114838	10	M3	0.00647866	-0.572618	-0.408318
VC20557	-0.663448	0.284055	10	M5	0.016275	-0.866648	-0.460247
VC20588	0.390855	0.108925	10	M5	0.0509111	0.312934	0.468775
VC20125	-0.417838	0.10498	10	M5	0.00305429	-0.492936	-0.34274
VC30084	-0.412073	0.0732099	10	M5	0.00344374	-0.464444	-0.359701
VC40847	-0.280666	0.219777	10	M5	0.0116672	-0.437885	-0.123448
VC30017	-0.0289778	0.237665	10	M5	0.01704	-0.198993	0.141038
VC30063	-0.0424213	0.123866	10	M5	0.0472541	-0.13103	0.0461872
VC20661	-0.568139	0.148742	10	M5	0.0668173	-0.674543	-0.461735
VC30002	0.129225	0.129249	10	M5	0.0404858	0.0367658	0.221684
VC20226	-0.884111	0.12682	10	M5	0.00771163	-0.974832	-0.793389
VC20554	-0.791178	0.145974	10	M5	0.049278	-0.895602	-0.686755
VC30188	-1.12843	0.285897	10	M5	0.0091947	-1.33295	-0.923912
VC40533	-0.934169	0.230462	10	M5	0.00522384	-1.09903	-0.769306
VC20752	-0.061452	0.267159	10	M5	0.00456244	-0.252566	0.129662
VC20570	-0.350511	0.254717	10	M5	0.0239075	-0.532724	-0.168298
VC40704	-0.597337	0.151454	10	M5	0.00988349	-0.705681	-0.488994
VC20348	-1.23334	0.552518	10	M5	0.00334308	-1.62858	-0.838088
VC30085	-0.478587	0.190683	10	M5	0.00773535	-0.614994	-0.342181
VC20198	0.371028	0.0879489	10	M5	0.0541156	0.308113	0.433943
VC40251	-0.976767	0.250444	10	M5	0.00898734	-1.15592	-0.79761
VC40004	-0.0787504	0.135898	10	M5	0.0682264	-0.175966	0.0184652
VC40011	-0.169051	0.157539	10	M5	0.0435311	-0.281748	-0.0563548
VC40781	-0.296297	0.0826579	10	M5	0.00269064	-0.355426	-0.237167
VC20182	-0.172645	0.110905	10	M5	0.0694168	-0.251981	-0.0933085
VC30146	0.0304463	0.0755662	10	M5	0.0677653	-0.0236105	0.0845031
VC30116	-1.24673	0.238939	10	M5	0.0105573	-1.41765	-1.0758
VC20781	-0.770312	0.160457	10	M5	0.0127445	-0.885096	-0.655528
VC20019	0.22776	0.10589	10	M5	0.0998861	0.152011	0.303509
VC20597	-0.172866	0.120602	10	M5	0.0189129	-0.259139	-0.086593
VC40258	-0.791387	0.187053	10	M5	0.00946545	-0.925197	-0.657578
VC40856	-0.736703	0.146651	10	M5	0.0144371	-0.841611	-0.631795
VC40514	-0.922123	0.380684	10	M5	0.00375247	-1.19445	-0.649798
VC40625	-0.846378	0.412671	10	M5	0.00377461	-1.14159	-0.55117
VC30079	-0.589502	0.1784	10	M5	0.00653174	-0.717121	-0.461882
VC20665	-0.0529386	0.112284	10	M5	0.0294664	-0.133261	0.0273842
VC40632	-0.80057	0.240171	9	M7	0.00737199	-0.985182	-0.615959
VC40625	-0.418242	0.234331	9	M7	0.011683	-0.598365	-0.238119
VC40064	-0.669468	0.125966	9	M7	0.00802868	-0.766294	-0.572642
VC40118	-0.818912	0.096791	9	M7	0.0131457	-0.893312	-0.744512
VC20608	-0.268793	0.157029	9	M7	0.0234979	-0.389496	-0.148089
VC40000	0.640515	0.0735351	9	M7	0.0563315	0.583991	0.697039
VC30225	0.237571	0.111512	9	M7	0.0685546	0.151855	0.323287
VC30257	-1.05333	0.062673	9	M7	0.0202105	-1.10151	-1.00516
VC20338	-0.326703	0.146012	9	M7	0.00986676	-0.438938	-0.214469
VC20617	0.127853	0.0909972	9	M7	0.0223794	0.0579067	0.1978
VC40258	-0.517491	0.212371	9	M7	0.0260266	-0.680733	-0.354248
VC40076	-0.114837	0.130772	9	M7	0.0203484	-0.215357	-0.0143164
VC40998	-0.687557	0	9	M7	0.00672823	-0.687557	-0.687557
VC20226	-0.840361	0.232952	9	M7	0.0234879	-1.01942	-0.661298
VC30084	-0.25754	0.152878	9	M7	0.0090879	-0.375053	-0.140028
VC40038	0.115458	0.079753	9	M7	0.0623342	0.0541549	0.176762
VC20752	-0.282726	0.216798	9	M7	0.027502	-0.449372	-0.11608
VC20233	0.0594166	0.140116	9	M7	0.0741899	-0.0482865	0.16712
VC40529	-0.100791	0.341442	9	M7	0.0155128	-0.363247	0.161665
VC40566	-0.81367	0.00658497	9	M7	0.00960284	-0.818732	-0.808609
VC40093	0.20185	0.114846	9	M7	0.045962	0.113571	0.290129
VC30085	-0.236479	0.123409	9	M7	0.0241973	-0.33134	-0.141619
VC40781	-0.708326	0.127776	9	M7	0.00968576	-0.806544	-0.610109
VC20657	-0.412569	0.0816905	9	M7	0.0253928	-0.475361	-0.349776
VC40568	-0.788009	0.276538	9	M7	0.0195223	-1.00058	-0.575443
VC20190	-1.18329	0.426912	9	M7	0.0146475	-1.51144	-0.855136
VC30220	-1.23995	0.218814	9	M7	0.00617212	-1.40814	-1.07175
VC40174	-1.14955	0.419444	9	M7	0.0090842	-1.47196	-0.827133
VC30083	-0.755035	0.273378	9	M7	0.0073481	-0.965172	-0.544898
VC40251	-0.848515	0.198367	9	M7	0.0346076	-1.00099	-0.696037
VC40704	-0.496087	0.314103	9	M7	0.0324168	-0.737528	-0.254646
VC40846	0.0922826	0.139757	9	M7	0.0127142	-0.0151445	0.19971
VC20125	-0.868238	0.295862	9	M7	0.0455099	-1.09566	-0.640819
VC40050	-0.279315	0.143652	9	M7	0.031613	-0.389736	-0.168894
VC20663	-0.371616	0.133517	9	M7	0.0383089	-0.474246	-0.268986
VC30112	-0.140198	0.121454	9	M7	0.0266762	-0.233556	-0.04684
VC40697	-1.30501	0.391503	9	M7	0.00876666	-1.60595	-1.00408
VC20778	-0.442168	0.224133	9	M7	0.0191382	-0.614452	-0.269884
VC20293	-0.15251	0.137573	9	M7	0.037857	-0.258258	-0.0467621
VC40766	-0.717219	0.145457	9	M7	0.0121839	-0.829027	-0.60541
VC20444	-0.623956	0.265219	9	M7	0.0463549	-0.827821	-0.420091
VC20019	0.530914	0.0340081	10	M8	0.0887784	0.506586	0.555242
VC30257	-1.01907	0	10	M8	0.0168686	-1.01907	-1.01907
VC20338	-0.450504	0.123519	10	M8	0.010175	-0.538864	-0.362144
VC40000	0.526734	0.0738191	10	M8	0.0343273	0.473927	0.579541
VC40076	-0.169096	0.250551	10	M8	0.0273456	-0.34833	0.0101379
VC30085	-0.141094	0.161096	10	M8	0.0270468	-0.256335	-0.0258523
VC20226	-0.893025	0.242779	10	M8	0.0275219	-1.0667	-0.719352
VC40064	-0.677565	0.280594	10	M8	0.00512926	-0.87829	-0.47684
VC20752	-0.217001	0.182975	10	M8	0.0229704	-0.347893	-0.086108
VC20608	-0.328726	0.188364	10	M8	0.0178152	-0.463473	-0.193978
VC40632	-1.07262	0.429476	10	M8	0.0132948	-1.37984	-0.765386
VC40118	-0.838536	0.149889	10	M8	0.0137544	-0.94576	-0.731312
VC40625	-0.656602	0.165942	10	M8	0.0135089	-0.77531	-0.537894
VC30084	-0.202822	0.0972664	10	M8	0.0166584	-0.272402	-0.133242
VC40174	-1.53983	0	10	M8	0.00845418	-1.53983	-1.53983
VC40766	-0.647768	0.267914	10	M8	0.00630364	-0.839422	-0.456114
VC30083	-0.647569	0.186163	10	M8	0.00511523	-0.780742	-0.514396
VC40529	-0.268556	0.303595	10	M8	0.0107706	-0.485735	-0.0513775
VC20293	-0.495367	0.138331	10	M8	0.0422557	-0.594323	-0.396411
VC40566	-1.2848	0.451432	10	M8	0.010749	-1.60773	-0.961863
VC20617	-0.00748828	0.114621	10	M8	0.00663185	-0.0894834	0.0745068
VC40998	-1.04053	0.335829	10	M8	0.00606843	-1.28077	-0.800292
VC40258	-0.563777	0.160461	10	M8	0.0335901	-0.678564	-0.448991
VC20657	-0.575214	0.127909	10	M8	0.0174951	-0.666714	-0.483713
VC40697	-1.0378	0	10	M8	0.00421517	-1.0378	-1.0378
VC30112	-0.217114	0.11486	10	M8	0.0207156	-0.29928	-0.134948
VC40050	-0.43823	0.182899	10	M8	0.0309026	-0.569068	-0.307392
VC20663	-0.207854	0.120625	10	M8	0.038295	-0.294143	-0.121564
VC40251	-0.7927	0.176031	10	M8	0.0239027	-0.918625	-0.666775
VC20233	0.0361217	0.0794141	10	M8	0.0557529	-0.0206877	0.0929311
VC20778	-0.310051	0.170771	10	M8	0.0220472	-0.432213	-0.187889
VC40781	-0.890983	0.0846802	10	M8	0.0162266	-0.951559	-0.830406
VC40846	0.0930586	0.125158	10	M8	0.0101347	0.00352628	0.182591
VC20125	-0.885798	0.261425	10	M8	0.0378785	-1.07281	-0.698786
VC20444	-0.208908	0.290701	10	M8	0.0343933	-0.416863	-0.000953063
VC30220	-1.18837	0.197788	10	M8	0.00566406	-1.32986	-1.04688
VC30225	0.0333644	0.149437	10	M8	0.0620623	-0.0735365	0.140265
VC40704	-0.747894	0.199849	10	M8	0.0243701	-0.890857	-0.60493
VC40038	-0.0551197	0.122425	10	M8	0.0689837	-0.142697	0.032458
VC40568	-0.794035	0.222669	10	M8	0.0207434	-0.953322	-0.634747
VC40093	-0.0325239	0.0979352	10	M8	0.064461	-0.102583	0.0375348
VC20190	-1.75663	0.499136	10	M8	0.017548	-2.11369	-1.39957
VC20019	0.0785841	0.232986	24	M10	0.0166132	-0.0197971	0.176965
VC20473	0.0244127	0.364546	24	M10	0.0123917	-0.129521	0.178347
VC20155	0.132726	0.105919	24	M10	0.0265022	0.0879997	0.177451
VC20128	-0.0869722	0.259477	24	M10	0.0173454	-0.19654	0.0225951
VC10130	-0.19911	0.145825	24	M10	0.0230233	-0.260686	-0.137533
VC20140	-0.225841	0.166276	24	M10	0.0266757	-0.296053	-0.155629
VC20430	-0.0717723	0.153024	24	M10	0.0143446	-0.136389	-0.00715579
VC20514	-0.174999	0.161828	24	M10	0.0156286	-0.243333	-0.106665
VC20213	-0.335203	0.223632	24	M10	0.0239847	-0.429634	-0.240771
VC20408	-0.316027	0.130728	24	M10	0.0160318	-0.371228	-0.260825
VC20409	-0.745411	0.175905	24	M10	0.00543767	-0.819689	-0.671133
VC40025	-0.101257	0.341849	24	M10	0.0162589	-0.245607	0.0430931
VC20137	-0.481296	0.172265	24	M10	0.0112815	-0.554037	-0.408555
VC20047	-0.351298	0.117909	24	M10	0.0163773	-0.401087	-0.301509
VC20150	-0.340673	0.165043	24	M10	0.0121004	-0.410365	-0.270982
VC20156	-0.526523	0.0984277	24	M10	0.0112137	-0.568085	-0.484961
VC20147	-0.23158	0.208098	24	M10	0.0178413	-0.319452	-0.143708
VC20563	-0.0120286	0.0783457	24	M10	0.0218579	-0.0451111	0.0210539
VC20476	-0.379238	0.19238	24	M10	0.0204028	-0.460473	-0.298003
VC20060	-0.281052	0.180555	24	M10	0.0166481	-0.357294	-0.204811
VC10118	-0.445758	0.1477	24	M10	0.0141404	-0.508127	-0.38339
VC20460	-1.19095	0.281564	24	M10	0.0176909	-1.30984	-1.07205
VC40443	-0.931592	0.24729	24	M10	0.0128475	-1.03601	-0.827171
VC20501	-0.454619	0.159177	24	M10	0.0126567	-0.521833	-0.387404
VC20158	-0.582773	0.128768	24	M10	0.0189119	-0.637147	-0.528399
VC20416	-0.774975	0.137747	24	M10	0.00635487	-0.83314	-0.716809
VC20127	0.320161	0.145272	24	M10	0.020299	0.258818	0.381504
VC30159	-0.488946	0.123338	24	M10	0.0257369	-0.541027	-0.436865
VC20007	-0.532118	0.178589	24	M10	0.00784354	-0.607529	-0.456706
VC20472	-0.467338	0.10848	24	M10	0.0126391	-0.513145	-0.421531
VC30175	-1.44261	0.563332	24	M10	0.0145656	-1.68048	-1.20474
VC40448	-1.31676	0.273539	24	M10	0.0141356	-1.43227	-1.20125
VC20433	0.0323492	0.146686	24	M10	0.0225248	-0.0295909	0.0942893
VC20678	-0.923312	0.200644	24	M10	0.0104305	-1.00804	-0.838587
VC20111	-0.0820544	0.171869	24	M10	0.0183829	-0.154628	-0.00948051
VC20438	-0.306983	0.191433	24	M10	0.0108648	-0.387819	-0.226148
VC20484	-0.552857	0.168094	24	M10	0.0110789	-0.623837	-0.481878
VC20146	-0.473037	0.156306	24	M10	0.00530775	-0.53904	-0.407035
VC20151	-0.336474	0.15871	24	M10	0.0217662	-0.403491	-0.269456
VC20009	-0.228601	0.162529	24	M10	0.0261156	-0.297231	-0.159971
VC20164	-0.433323	0.083955	24	M10	0.0119802	-0.468775	-0.397872
VC20428	0.16266	0.131408	24	M10	0.0308305	0.107171	0.218149
VC20573	-0.526117	0.159932	24	M10	0.0147045	-0.59365	-0.458583
VC30012	0.276117	0.107996	24	M10	0.03367	0.230514	0.32172
VC20145	0.261059	0.245558	24	M10	0.0146504	0.157369	0.364749
VC20475	-0.557467	0.296268	24	M10	0.0217137	-0.682571	-0.432364
VC30081	-0.451308	0.108199	24	M10	0.00824048	-0.496996	-0.405619
VC40402	-0.293641	0.140455	24	M10	0.0326224	-0.35295	-0.234332
VC20424	-0.3034	0.1767	24	M10	0.0309777	-0.378013	-0.228786
VC20437	-0.315416	0.162374	24	M10	0.00944592	-0.38398	-0.246852
VC20133	0.130438	0.274247	24	M10	0.0170399	0.0146334	0.246242
VC20439	-0.138961	0.183236	24	M10	0.0124392	-0.216335	-0.0615874
VC20571	-0.421798	0.147265	24	M10	0.00816201	-0.483983	-0.359614
VC20046	-0.497711	0.119844	24	M10	0.0160779	-0.548317	-0.447106
VC40928	-0.292596	0.150672	24	M10	0.0104126	-0.356219	-0.228973
VC30170	-0.0528909	0.162537	24	M10	0.0148172	-0.121524	0.0157424
VC20506	-0.544243	0.0724526	24	M10	0.0145291	-0.574837	-0.513649
VC20131	-0.154296	0.203072	24	M10	0.0240639	-0.240046	-0.0685463
VC20048	-0.549216	0.122337	24	M10	0.0231172	-0.600874	-0.497558
VC20474	-0.539862	0.112679	24	M10	0.0150939	-0.587442	-0.492282
VC20019	0.00732845	0.177499	24	M11	0.0181766	-0.0676227	0.0822796
VC20739	0.219765	0.206543	24	M11	0.0215614	0.13255	0.306981
VC20405	-0.141335	0.146332	24	M11	0.0245243	-0.203125	-0.0795445
VC20165	-0.113324	0.220937	24	M11	0.0179867	-0.206617	-0.02003
VC20697	-0.394186	0.190308	24	M11	0.0196371	-0.474546	-0.313826
VC20675	-0.42638	0.176413	24	M11	0.0190702	-0.500872	-0.351887
VC20475	-0.425231	0.24855	24	M11	0.0284045	-0.530185	-0.320278
VC30081	-0.532722	0.154601	24	M11	0.0118911	-0.598004	-0.46744
VC40402	-0.10139	0.228261	24	M11	0.029372	-0.197776	-0.00500371
VC20460	-0.94751	0.203673	24	M11	0.0296662	-1.03351	-0.861506
VC20465	-0.396476	0.147845	24	M11	0.0171605	-0.458906	-0.334047
VC20577	0.179963	0.131196	24	M11	0.0197185	0.124564	0.235362
VC20734	-0.775459	0.35721	24	M11	0.0127937	-0.926295	-0.624622
VC20500	-0.30847	0.16745	24	M11	0.00768719	-0.379178	-0.237762
VC20407	0.0195545	0.348788	24	M11	0.0281905	-0.127726	0.166835
VC20510	-0.337051	0.158357	24	M11	0.0125561	-0.403919	-0.270182
VC20420	-0.431694	0.158128	24	M11	0.0150091	-0.498466	-0.364923
VC20472	-0.500827	0.14914	24	M11	0.0151616	-0.563803	-0.437851
VC30175	-1.21923	0.298404	24	M11	0.0208789	-1.34523	-1.09322
VC20701	-0.133138	0.225993	24	M11	0.0250628	-0.228567	-0.0377095
VC20614	-0.292699	0.184905	24	M11	0.0187804	-0.370778	-0.214621
VC20612	-0.408748	0.15633	24	M11	0.0171235	-0.47476	-0.342735
VC20427	-0.507018	0.179228	24	M11	0.00855248	-0.582699	-0.431336
VC40443	-0.596313	0.140937	24	M11	0.0129702	-0.655826	-0.536801
VC20484	-0.385525	0.246145	24	M11	0.0165303	-0.489463	-0.281586
VC40922	-0.67376	0.154643	24	M11	0.0227714	-0.73906	-0.60846
VC40053	-0.670455	0.18366	24	M11	0.00936221	-0.748008	-0.592902
VC20452	-0.2054	0.178036	24	M11	0.00912224	-0.280578	-0.130223
VC20558	-0.459598	0.161739	24	M11	0.0184608	-0.527894	-0.391301
VC20046	-0.388398	0.188583	24	M11	0.02276	-0.46803	-0.308766
VC20463	-0.272468	0.123845	24	M11	0.00870384	-0.324763	-0.220173
VC20135	-0.192609	0.241035	24	M11	0.0168641	-0.29439	-0.0908292
VC40448	-0.905946	0.295687	24	M11	0.0209119	-1.0308	-0.781089
VC40403	-0.517797	0.189636	24	M11	0.00652945	-0.597873	-0.43772
VC20711	0.164723	0.199181	24	M11	0.0145391	0.0806161	0.24883
VC20159	-0.21523	0.180756	24	M11	0.0171948	-0.291556	-0.138903
VC20569	-0.126165	0.217752	24	M11	0.0199567	-0.218114	-0.0342165
VC20123	-0.344383	0.209712	24	M11	0.022784	-0.432937	-0.25583
VC20446	-0.699763	0.213606	24	M11	0.00994994	-0.789961	-0.609565
VC20169	-0.0825045	0.317239	24	M11	0.021338	-0.216463	0.0514536
VC20409	-0.441311	0.126028	24	M11	0.00682154	-0.494528	-0.388094
VC20503	-0.154263	0.150692	24	M11	0.0271943	-0.217895	-0.090631
VC20162	-0.530201	0.142983	24	M11	0.0139287	-0.590578	-0.469825
VC40928	-0.355946	0.155799	24	M11	0.0220333	-0.421734	-0.290158
VC20725	-0.942475	0.23099	24	M11	0.0158383	-1.04001	-0.844937
VC20126	-0.221872	0.21163	24	M11	0.0113842	-0.311235	-0.132509
VC20499	-0.349805	0.131056	24	M11	0.0123876	-0.405145	-0.294465
VC20686	0.429966	0.153855	24	M11	0.0236796	0.364999	0.494933
VC20142	-0.940342	0.331071	24	M11	0.020754	-1.08014	-0.800543
VC40223	-0.816499	0.26941	24	M11	0.0107646	-0.930261	-0.702737
VC40749	-0.489686	0.254076	24	M11	0.0203426	-0.596973	-0.3824
VC20471	-0.615867	0.173318	24	M11	0.0244575	-0.689053	-0.542682
VC20594	0.237788	0.172942	24	M11	0.0373375	0.164761	0.310815
VC20478	-0.809129	0.18787	24	M11	0.0200993	-0.88846	-0.729798
VC20345	-0.479754	0.126056	24	M11	0.0146989	-0.532983	-0.426525
VC20750	-0.129655	0.242045	24	M11	0.010456	-0.231861	-0.0274485
VC20666	-0.474939	0.183974	24	M11	0.0152486	-0.552625	-0.397254
VC20448	-0.472767	0.102646	24	M11	0.00849002	-0.516111	-0.429424
VC40025	0.109056	0.296394	24	M11	0.0153152	-0.0161	0.234212

## Sheet: FCR.stats.by.treatment
strain	mean.FCR	FCR.SD	num.reps	group	pool	start.pop	lower.CL	upper.CL
VC20152	0.198381	0.0904906	8	NA22	M1	0.0389427	0.122729	0.274033
VC20496	-0.340837	0.0911022	8	NA22	M1	0.0164797	-0.417	-0.264674
VC40870	-0.667575	0.185409	8	NA22	M1	0.0296047	-0.822581	-0.512568
VC20684	-0.313736	0.0767511	8	NA22	M1	0.0445671	-0.377901	-0.24957
VC20738	-1.89793	0	8	NA22	M1	0.0138888	-1.89793	-1.89793
VC40154	-0.798118	0.284408	8	NA22	M1	0.00437206	-1.03589	-0.560347
VC40719	-0.453442	0.0850559	8	NA22	M1	0.0562618	-0.52455	-0.382333
VC40687	0.340203	0.0358452	8	NA22	M1	0.110159	0.310235	0.37017
VC40632	-1.04004	0	8	NA22	M1	0.00869468	-1.04004	-1.04004
VC40721	-1.13466	0	8	NA22	M1	0.00482096	-1.13466	-1.13466
VC40529	-0.915651	0	8	NA22	M1	0.00355858	-0.915651	-0.915651
VC20263	-1.49027	0	8	NA22	M1	0.00789283	-1.49027	-1.49027
VC20110	-0.0731203	0.104422	8	NA22	M1	0.0523614	-0.160419	0.0141789
VC20492	-0.329542	0.067539	8	NA22	M1	0.0260649	-0.386006	-0.273078
VC40238	-0.646304	0.0781178	8	NA22	M1	0.0127128	-0.711612	-0.580996
VC20461	-0.892262	0.350524	8	NA22	M1	0.0126065	-1.18531	-0.599217
VC40174	-0.761318	0	8	NA22	M1	0.00287316	-0.761318	-0.761318
VC20649	-0.427992	0.0517308	8	NA22	M1	0.00538574	-0.47124	-0.384744
VC40250	-0.988455	0	8	NA22	M1	0.00781024	-0.988455	-0.988455
VC20555	-0.976587	0	8	NA22	M1	0.00761985	-0.976587	-0.976587
VC40138	-1.41987	0.303582	8	NA22	M1	0.0106125	-1.67368	-1.16607
VC20647	-0.336824	0.134546	8	NA22	M1	0.0513756	-0.449307	-0.22434
VC20172	-0.263611	0.0921455	8	NA22	M1	0.0759826	-0.340646	-0.186575
VC20293	-1.07568	0	8	NA22	M1	0.0197357	-1.07568	-1.07568
VC10128	-0.244586	0.0757031	8	NA22	M1	0.104537	-0.307875	-0.181297
VC20444	-1.61409	0	8	NA22	M1	0.00306118	-1.61409	-1.61409
VC40575	-0.896089	0.242636	8	NA22	M1	0.0221342	-1.09894	-0.69324
VC20136	-0.277467	0.0900854	8	NA22	M1	0.0271906	-0.35278	-0.202154
VC40542	-0.582466	0.187027	8	NA22	M1	0.0135424	-0.738825	-0.426107
VC20435	-0.511507	0.134704	8	NA22	M1	0.0143915	-0.624122	-0.398892
VC30220	-1.52715	0	8	NA22	M1	0.00288216	-1.52715	-1.52715
VC40846	-0.968914	0.147973	8	NA22	M1	0.0100004	-1.09262	-0.845206
VC40766	-0.887415	0	8	NA22	M1	0.00342197	-0.887415	-0.887415
VC40033	0.25613	0.0752952	8	NA22	M1	0.0291209	0.193182	0.319078
VC40764	-1.46069	0.223078	8	NA22	M1	0.0321798	-1.64719	-1.27419
VC30112	-0.682904	0	8	NA22	M1	0.00257721	-0.682904	-0.682904
VC20704	-0.0296597	0.0554698	8	NA22	M1	0.0540179	-0.0760336	0.0167143
VC20413	-0.421045	0.0924449	8	NA22	M1	0.0148176	-0.498331	-0.343759
VC20732	-0.860461	0.229968	8	NA22	M1	0.00936144	-1.05272	-0.668203
VC20233	-1.12792	0	8	NA22	M1	0.0104379	-1.12792	-1.12792
VC20486	-0.967699	0.258629	8	NA22	M1	0.0123708	-1.18392	-0.75148
VC20608	-1.15388	0	8	NA22	M1	0.00495111	-1.15388	-1.15388
VC40632	-0.280902	0.0905422	10	NA22	M3	0.00609308	-0.345672	-0.216132
VC40719	-0.618909	0.137693	10	NA22	M3	0.0518962	-0.717409	-0.52041
VC20496	-0.305335	0.132299	10	NA22	M3	0.0143398	-0.399976	-0.210694
VC40687	0.0906301	0.0937328	10	NA22	M3	0.0680353	0.0235776	0.157682
VC20263	-1.63197	0	10	NA22	M3	0.00309935	-1.63197	-1.63197
VC20110	-0.213558	0.0895928	10	NA22	M3	0.0637487	-0.277649	-0.149467
VC20617	-1.0228	0.232598	10	NA22	M3	0.00500681	-1.18919	-0.856407
VC20684	-0.229581	0.113171	10	NA22	M3	0.0602398	-0.310539	-0.148624
VC20738	-1.32541	0.441242	10	NA22	M3	0.0284727	-1.64106	-1.00977
VC40870	-0.518201	0.144431	10	NA22	M3	0.057176	-0.621521	-0.414882
VC20492	-0.30241	0.0492781	10	NA22	M3	0.0148424	-0.337662	-0.267159
VC20608	-0.801623	0.143415	10	NA22	M3	0.00343756	-0.904216	-0.69903
VC40575	-0.461108	0.0572622	10	NA22	M3	0.0185756	-0.502071	-0.420145
VC20152	0.192366	0.0439265	10	NA22	M3	0.0840811	0.160943	0.223789
VC20555	-0.927202	0.300846	10	NA22	M3	0.00908082	-1.14241	-0.71199
VC20444	-0.898612	0.0979883	10	NA22	M3	0.00362806	-0.968709	-0.828516
VC20239	-1.30293	0.196202	10	NA22	M3	0.00692589	-1.44329	-1.16258
VC10128	-0.0719012	0.125041	10	NA22	M3	0.0556661	-0.16135	0.0175477
VC20019	0.0997105	0.126575	10	NA22	M3	0.0119332	0.00916443	0.190257
VC40529	-1.12893	0.315275	10	NA22	M3	0.0066201	-1.35447	-0.903399
VC20647	-0.0745832	0.126488	10	NA22	M3	0.0211954	-0.165067	0.015901
VC20486	-0.459246	0.08099	10	NA22	M3	0.0187597	-0.517183	-0.401309
VC40764	-1.00403	0.218076	10	NA22	M3	0.0122704	-1.16003	-0.848023
VC20136	-0.192039	0.102257	10	NA22	M3	0.0257563	-0.265189	-0.11889
VC40238	-0.620515	0.127895	10	NA22	M3	0.0214341	-0.712006	-0.529024
VC40138	-0.733655	0.110477	10	NA22	M3	0.00297341	-0.812686	-0.654624
VC40154	-0.995081	0.237686	10	NA22	M3	0.0139219	-1.16511	-0.825051
VC40542	-0.248208	0.128475	10	NA22	M3	0.0223955	-0.340113	-0.156302
VC20435	-0.375978	0.148334	10	NA22	M3	0.0455283	-0.482089	-0.269866
VC20413	-0.384547	0.0853311	10	NA22	M3	0.022637	-0.445589	-0.323505
VC40033	0.319998	0.0353841	10	NA22	M3	0.0574737	0.294685	0.34531
VC20649	-0.34942	0.0970402	10	NA22	M3	0.034648	-0.418839	-0.280002
VC20233	-0.265989	0.055978	10	NA22	M3	0.00427683	-0.306033	-0.225944
VC20732	-0.357655	0.115922	10	NA22	M3	0.0129421	-0.44058	-0.274729
VC20172	-0.26567	0.127085	10	NA22	M3	0.023147	-0.356581	-0.174759
VC20461	-0.58819	0.0692539	10	NA22	M3	0.0106843	-0.637731	-0.538648
VC20704	-0.0686387	0.153	10	NA22	M3	0.0516767	-0.178089	0.0408112
VC40766	-0.701352	0.125476	10	NA22	M3	0.0029456	-0.791112	-0.611592
VC40250	-0.645803	0.125653	10	NA22	M3	0.0179143	-0.73569	-0.555916
VC40846	-0.490468	0.114838	10	NA22	M3	0.00647866	-0.572618	-0.408318
VC20557	-0.663448	0.284055	10	HT115	M5	0.016275	-0.866648	-0.460247
VC20588	0.390855	0.108925	10	HT115	M5	0.0509111	0.312934	0.468775
VC20125	-0.417838	0.10498	10	HT115	M5	0.00305429	-0.492936	-0.34274
VC30084	-0.412073	0.0732099	10	HT115	M5	0.00344374	-0.464444	-0.359701
VC40847	-0.280666	0.219777	10	HT115	M5	0.0116672	-0.437885	-0.123448
VC30017	-0.0289778	0.237665	10	HT115	M5	0.01704	-0.198993	0.141038
VC30063	-0.0424213	0.123866	10	HT115	M5	0.0472541	-0.13103	0.0461872
VC20661	-0.568139	0.148742	10	HT115	M5	0.0668173	-0.674543	-0.461735
VC30002	0.129225	0.129249	10	HT115	M5	0.0404858	0.0367658	0.221684
VC20226	-0.884111	0.12682	10	HT115	M5	0.00771163	-0.974832	-0.793389
VC20554	-0.791178	0.145974	10	HT115	M5	0.049278	-0.895602	-0.686755
VC30188	-1.12843	0.285897	10	HT115	M5	0.0091947	-1.33295	-0.923912
VC40533	-0.934169	0.230462	10	HT115	M5	0.00522384	-1.09903	-0.769306
VC20752	-0.061452	0.267159	10	HT115	M5	0.00456244	-0.252566	0.129662
VC20570	-0.350511	0.254717	10	HT115	M5	0.0239075	-0.532724	-0.168298
VC40704	-0.597337	0.151454	10	HT115	M5	0.00988349	-0.705681	-0.488994
VC20348	-1.23334	0.552518	10	HT115	M5	0.00334308	-1.62858	-0.838088
VC30085	-0.478587	0.190683	10	HT115	M5	0.00773535	-0.614994	-0.342181
VC20198	0.371028	0.0879489	10	HT115	M5	0.0541156	0.308113	0.433943
VC40251	-0.976767	0.250444	10	HT115	M5	0.00898734	-1.15592	-0.79761
VC40004	-0.0787504	0.135898	10	HT115	M5	0.0682264	-0.175966	0.0184652
VC40011	-0.169051	0.157539	10	HT115	M5	0.0435311	-0.281748	-0.0563548
VC40781	-0.296297	0.0826579	10	HT115	M5	0.00269064	-0.355426	-0.237167
VC20182	-0.172645	0.110905	10	HT115	M5	0.0694168	-0.251981	-0.0933085
VC30146	0.0304463	0.0755662	10	HT115	M5	0.0677653	-0.0236105	0.0845031
VC30116	-1.24673	0.238939	10	HT115	M5	0.0105573	-1.41765	-1.0758
VC20781	-0.770312	0.160457	10	HT115	M5	0.0127445	-0.885096	-0.655528
VC20019	0.22776	0.10589	10	HT115	M5	0.0998861	0.152011	0.303509
VC20597	-0.172866	0.120602	10	HT115	M5	0.0189129	-0.259139	-0.086593
VC40258	-0.791387	0.187053	10	HT115	M5	0.00946545	-0.925197	-0.657578
VC40856	-0.736703	0.146651	10	HT115	M5	0.0144371	-0.841611	-0.631795
VC40514	-0.922123	0.380684	10	HT115	M5	0.00375247	-1.19445	-0.649798
VC40625	-0.846378	0.412671	10	HT115	M5	0.00377461	-1.14159	-0.55117
VC30079	-0.589502	0.1784	10	HT115	M5	0.00653174	-0.717121	-0.461882
VC20665	-0.0529386	0.112284	10	HT115	M5	0.0294664	-0.133261	0.0273842
VC40632	-0.80057	0.240171	9	HT115	M7	0.00737199	-0.985182	-0.615959
VC40625	-0.418242	0.234331	9	HT115	M7	0.011683	-0.598365	-0.238119
VC40064	-0.669468	0.125966	9	HT115	M7	0.00802868	-0.766294	-0.572642
VC40118	-0.818912	0.096791	9	HT115	M7	0.0131457	-0.893312	-0.744512
VC20608	-0.268793	0.157029	9	HT115	M7	0.0234979	-0.389496	-0.148089
VC40000	0.640515	0.0735351	9	HT115	M7	0.0563315	0.583991	0.697039
VC30225	0.237571	0.111512	9	HT115	M7	0.0685546	0.151855	0.323287
VC30257	-1.05333	0.062673	9	HT115	M7	0.0202105	-1.10151	-1.00516
VC20338	-0.326703	0.146012	9	HT115	M7	0.00986676	-0.438938	-0.214469
VC20617	0.127853	0.0909972	9	HT115	M7	0.0223794	0.0579067	0.1978
VC40258	-0.517491	0.212371	9	HT115	M7	0.0260266	-0.680733	-0.354248
VC40076	-0.114837	0.130772	9	HT115	M7	0.0203484	-0.215357	-0.0143164
VC40998	-0.687557	0	9	HT115	M7	0.00672823	-0.687557	-0.687557
VC20226	-0.840361	0.232952	9	HT115	M7	0.0234879	-1.01942	-0.661298
VC30084	-0.25754	0.152878	9	HT115	M7	0.0090879	-0.375053	-0.140028
VC40038	0.115458	0.079753	9	HT115	M7	0.0623342	0.0541549	0.176762
VC20752	-0.282726	0.216798	9	HT115	M7	0.027502	-0.449372	-0.11608
VC20233	0.0594166	0.140116	9	HT115	M7	0.0741899	-0.0482865	0.16712
VC40529	-0.100791	0.341442	9	HT115	M7	0.0155128	-0.363247	0.161665
VC40566	-0.81367	0.00658497	9	HT115	M7	0.00960284	-0.818732	-0.808609
VC40093	0.20185	0.114846	9	HT115	M7	0.045962	0.113571	0.290129
VC30085	-0.236479	0.123409	9	HT115	M7	0.0241973	-0.33134	-0.141619
VC40781	-0.708326	0.127776	9	HT115	M7	0.00968576	-0.806544	-0.610109
VC20657	-0.412569	0.0816905	9	HT115	M7	0.0253928	-0.475361	-0.349776
VC40568	-0.788009	0.276538	9	HT115	M7	0.0195223	-1.00058	-0.575443
VC20190	-1.18329	0.426912	9	HT115	M7	0.0146475	-1.51144	-0.855136
VC30220	-1.23995	0.218814	9	HT115	M7	0.00617212	-1.40814	-1.07175
VC40174	-1.14955	0.419444	9	HT115	M7	0.0090842	-1.47196	-0.827133
VC30083	-0.755035	0.273378	9	HT115	M7	0.0073481	-0.965172	-0.544898
VC40251	-0.848515	0.198367	9	HT115	M7	0.0346076	-1.00099	-0.696037
VC40704	-0.496087	0.314103	9	HT115	M7	0.0324168	-0.737528	-0.254646
VC40846	0.0922826	0.139757	9	HT115	M7	0.0127142	-0.0151445	0.19971
VC20125	-0.868238	0.295862	9	HT115	M7	0.0455099	-1.09566	-0.640819
VC40050	-0.279315	0.143652	9	HT115	M7	0.031613	-0.389736	-0.168894
VC20663	-0.371616	0.133517	9	HT115	M7	0.0383089	-0.474246	-0.268986
VC30112	-0.140198	0.121454	9	HT115	M7	0.0266762	-0.233556	-0.04684
VC40697	-1.30501	0.391503	9	HT115	M7	0.00876666	-1.60595	-1.00408
VC20778	-0.442168	0.224133	9	HT115	M7	0.0191382	-0.614452	-0.269884
VC20293	-0.15251	0.137573	9	HT115	M7	0.037857	-0.258258	-0.0467621
VC40766	-0.717219	0.145457	9	HT115	M7	0.0121839	-0.829027	-0.60541
VC20444	-0.623956	0.265219	9	HT115	M7	0.0463549	-0.827821	-0.420091
VC20019	0.530914	0.0340081	10	HT115	M8	0.0887784	0.506586	0.555242
VC30257	-1.01907	0	10	HT115	M8	0.0168686	-1.01907	-1.01907
VC20338	-0.450504	0.123519	10	HT115	M8	0.010175	-0.538864	-0.362144
VC40000	0.526734	0.0738191	10	HT115	M8	0.0343273	0.473927	0.579541
VC40076	-0.169096	0.250551	10	HT115	M8	0.0273456	-0.34833	0.0101379
VC30085	-0.141094	0.161096	10	HT115	M8	0.0270468	-0.256335	-0.0258523
VC20226	-0.893025	0.242779	10	HT115	M8	0.0275219	-1.0667	-0.719352
VC40064	-0.677565	0.280594	10	HT115	M8	0.00512926	-0.87829	-0.47684
VC20752	-0.217001	0.182975	10	HT115	M8	0.0229704	-0.347893	-0.086108
VC20608	-0.328726	0.188364	10	HT115	M8	0.0178152	-0.463473	-0.193978
VC40632	-1.07262	0.429476	10	HT115	M8	0.0132948	-1.37984	-0.765386
VC40118	-0.838536	0.149889	10	HT115	M8	0.0137544	-0.94576	-0.731312
VC40625	-0.656602	0.165942	10	HT115	M8	0.0135089	-0.77531	-0.537894
VC30084	-0.202822	0.0972664	10	HT115	M8	0.0166584	-0.272402	-0.133242
VC40174	-1.53983	0	10	HT115	M8	0.00845418	-1.53983	-1.53983
VC40766	-0.647768	0.267914	10	HT115	M8	0.00630364	-0.839422	-0.456114
VC30083	-0.647569	0.186163	10	HT115	M8	0.00511523	-0.780742	-0.514396
VC40529	-0.268556	0.303595	10	HT115	M8	0.0107706	-0.485735	-0.0513775
VC20293	-0.495367	0.138331	10	HT115	M8	0.0422557	-0.594323	-0.396411
VC40566	-1.2848	0.451432	10	HT115	M8	0.010749	-1.60773	-0.961863
VC20617	-0.00748828	0.114621	10	HT115	M8	0.00663185	-0.0894834	0.0745068
VC40998	-1.04053	0.335829	10	HT115	M8	0.00606843	-1.28077	-0.800292
VC40258	-0.563777	0.160461	10	HT115	M8	0.0335901	-0.678564	-0.448991
VC20657	-0.575214	0.127909	10	HT115	M8	0.0174951	-0.666714	-0.483713
VC40697	-1.0378	0	10	HT115	M8	0.00421517	-1.0378	-1.0378
VC30112	-0.217114	0.11486	10	HT115	M8	0.0207156	-0.29928	-0.134948
VC40050	-0.43823	0.182899	10	HT115	M8	0.0309026	-0.569068	-0.307392
VC20663	-0.207854	0.120625	10	HT115	M8	0.038295	-0.294143	-0.121564
VC40251	-0.7927	0.176031	10	HT115	M8	0.0239027	-0.918625	-0.666775
VC20233	0.0361217	0.0794141	10	HT115	M8	0.0557529	-0.0206877	0.0929311
VC20778	-0.310051	0.170771	10	HT115	M8	0.0220472	-0.432213	-0.187889
VC40781	-0.890983	0.0846802	10	HT115	M8	0.0162266	-0.951559	-0.830406
VC40846	0.0930586	0.125158	10	HT115	M8	0.0101347	0.00352628	0.182591
VC20125	-0.885798	0.261425	10	HT115	M8	0.0378785	-1.07281	-0.698786
VC20444	-0.208908	0.290701	10	HT115	M8	0.0343933	-0.416863	-0.000953063
VC30220	-1.18837	0.197788	10	HT115	M8	0.00566406	-1.32986	-1.04688
VC30225	0.0333644	0.149437	10	HT115	M8	0.0620623	-0.0735365	0.140265
VC40704	-0.747894	0.199849	10	HT115	M8	0.0243701	-0.890857	-0.60493
VC40038	-0.0551197	0.122425	10	HT115	M8	0.0689837	-0.142697	0.032458
VC40568	-0.794035	0.222669	10	HT115	M8	0.0207434	-0.953322	-0.634747
VC40093	-0.0325239	0.0979352	10	HT115	M8	0.064461	-0.102583	0.0375348
VC20190	-1.75663	0.499136	10	HT115	M8	0.017548	-2.11369	-1.39957
VC20019	-0.0539485	0.1766	10	HT115	M10	0.0166132	-0.180281	0.0723838
VC20019	0.295867	0.153076	8	NA22	M10	0.0166132	0.167893	0.423842
VC20019	0.00976093	0.21072	6	OP50	M10	0.0166132	-0.211376	0.230898
VC20473	0.307643	0.159004	10	HT115	M10	0.0123917	0.193898	0.421387
VC20473	-0.0703948	0.19533	8	NA22	M10	0.0123917	-0.233695	0.092905
VC20473	-0.321227	0.440689	6	OP50	M10	0.0123917	-0.783702	0.141248
VC20155	0.159058	0.0952405	10	HT115	M10	0.0265022	0.0909268	0.227189
VC20155	0.061447	0.0662444	8	NA22	M10	0.0265022	0.00606529	0.116829
VC20155	0.183877	0.128377	6	OP50	M10	0.0265022	0.0491535	0.3186
VC20128	0.0361333	0.107664	10	HT115	M10	0.0173454	-0.0408849	0.113152
VC20128	-0.411414	0.105183	8	NA22	M10	0.0173454	-0.499348	-0.323479
VC20128	0.14044	0.1121	6	OP50	M10	0.0173454	0.0227983	0.258082
VC10130	-0.173732	0.108097	10	HT115	M10	0.0230233	-0.25106	-0.0964045
VC10130	-0.189708	0.142858	8	NA22	M10	0.0230233	-0.30914	-0.0702759
VC10130	-0.253941	0.207789	6	OP50	M10	0.0230233	-0.472003	-0.0358799
VC20140	-0.252787	0.127206	10	HT115	M10	0.0266757	-0.343784	-0.161789
VC20140	-0.142678	0.145511	8	NA22	M10	0.0266757	-0.264329	-0.0210278
VC20140	-0.291817	0.225098	6	OP50	M10	0.0266757	-0.528042	-0.0555912
VC20430	-0.105716	0.120536	10	HT115	M10	0.0143446	-0.191943	-0.0194899
VC20430	-0.00708397	0.127687	8	NA22	M10	0.0143446	-0.113833	0.0996648
VC20430	-0.10145	0.220638	6	OP50	M10	0.0143446	-0.332995	0.130096
VC20514	-0.10414	0.0857759	10	HT115	M10	0.0156286	-0.1655	-0.0427791
VC20514	-0.337683	0.110412	8	NA22	M10	0.0156286	-0.42999	-0.245376
VC20514	-0.0761851	0.161404	6	OP50	M10	0.0156286	-0.245568	0.0931981
VC20213	-0.385429	0.122112	10	HT115	M10	0.0239847	-0.472782	-0.298075
VC20213	-0.400039	0.262326	8	NA22	M10	0.0239847	-0.619348	-0.180729
VC20213	-0.165045	0.245673	6	OP50	M10	0.0239847	-0.422863	0.092773
VC20408	-0.329594	0.115504	10	HT115	M10	0.0160318	-0.41222	-0.246967
VC20408	-0.267636	0.160639	8	NA22	M10	0.0160318	-0.401934	-0.133339
VC20408	-0.357935	0.110682	6	OP50	M10	0.0160318	-0.474089	-0.241781
VC20409	-0.696142	0.101609	10	HT115	M10	0.00543767	-0.768829	-0.623456
VC20409	-0.740719	0.151359	8	NA22	M10	0.00543767	-0.867259	-0.61418
VC20409	-0.833782	0.27824	6	OP50	M10	0.00543767	-1.12578	-0.541788
VC40025	-0.15043	0.216183	10	HT115	M10	0.0162589	-0.305078	0.00421852
VC40025	-0.323484	0.297035	8	NA22	M10	0.0162589	-0.571811	-0.0751569
VC40025	0.277001	0.272703	6	OP50	M10	0.0162589	-0.00918321	0.563185
VC20137	-0.528202	0.0987671	10	HT115	M10	0.0112815	-0.598856	-0.457549
VC20137	-0.434738	0.189644	8	NA22	M10	0.0112815	-0.593285	-0.276191
VC20137	-0.465197	0.245798	6	OP50	M10	0.0112815	-0.723146	-0.207248
VC20047	-0.349848	0.103258	10	HT115	M10	0.0163773	-0.423714	-0.275982
VC20047	-0.297908	0.13414	8	NA22	M10	0.0163773	-0.410052	-0.185765
VC20047	-0.424902	0.0922143	6	OP50	M10	0.0163773	-0.521675	-0.328129
VC20150	-0.33928	0.0867759	10	HT115	M10	0.0121004	-0.401356	-0.277205
VC20150	-0.267088	0.195008	8	NA22	M10	0.0121004	-0.430119	-0.104057
VC20150	-0.441108	0.194253	6	OP50	M10	0.0121004	-0.644964	-0.237253
VC20156	-0.56416	0.0920331	10	HT115	M10	0.0112137	-0.629996	-0.498323
VC20156	-0.545521	0.0497594	8	NA22	M10	0.0112137	-0.587121	-0.503922
VC20156	-0.438464	0.114614	6	OP50	M10	0.0112137	-0.558745	-0.318184
VC20147	-0.312961	0.0798331	10	HT115	M10	0.0178413	-0.37007	-0.255852
VC20147	-0.215349	0.246514	8	NA22	M10	0.0178413	-0.42144	-0.00925854
VC20147	-0.117586	0.27091	6	OP50	M10	0.0178413	-0.401889	0.166717
VC20563	-0.022709	0.064303	10	HT115	M10	0.0218579	-0.0687086	0.0232906
VC20563	-0.0224725	0.105214	8	NA22	M10	0.0218579	-0.110433	0.0654883
VC20563	0.0196972	0.0606952	6	OP50	M10	0.0218579	-0.0439985	0.0833929
VC20476	-0.542846	0.0780164	10	HT115	M10	0.0204028	-0.598655	-0.487036
VC20476	-0.320964	0.133711	8	NA22	M10	0.0204028	-0.43275	-0.209179
VC20476	-0.184258	0.172253	6	OP50	M10	0.0204028	-0.365026	-0.00348895
VC20060	-0.135692	0.138466	10	HT115	M10	0.0166481	-0.234744	-0.0366392
VC20060	-0.373005	0.119053	8	NA22	M10	0.0166481	-0.472536	-0.273474
VC20060	-0.400716	0.150448	6	OP50	M10	0.0166481	-0.558602	-0.242831
VC10118	-0.424443	0.101302	10	HT115	M10	0.0141404	-0.496911	-0.351976
VC10118	-0.454346	0.178829	8	NA22	M10	0.0141404	-0.60385	-0.304841
VC10118	-0.469834	0.188109	6	OP50	M10	0.0141404	-0.667242	-0.272425
VC20460	-1.0901	0.24646	10	HT115	M10	0.0176909	-1.26641	-0.913793
VC20460	-1.219	0.319066	8	NA22	M10	0.0176909	-1.48574	-0.952252
VC20460	-1.32162	0.265948	6	OP50	M10	0.0176909	-1.60072	-1.04253
VC40443	-0.868091	0.212686	10	HT115	M10	0.0128475	-1.02024	-0.715945
VC40443	-0.86662	0.174226	8	NA22	M10	0.0128475	-1.01228	-0.720964
VC40443	-1.12406	0.313224	6	OP50	M10	0.0128475	-1.45277	-0.795349
VC20501	-0.525415	0.0802401	10	HT115	M10	0.0126567	-0.582815	-0.468014
VC20501	-0.515339	0.129163	8	NA22	M10	0.0126567	-0.623322	-0.407356
VC20501	-0.255665	0.134847	6	OP50	M10	0.0126567	-0.397178	-0.114152
VC20158	-0.594551	0.117947	10	HT115	M10	0.0189119	-0.678925	-0.510177
VC20158	-0.564655	0.152757	8	NA22	M10	0.0189119	-0.692363	-0.436947
VC20158	-0.587299	0.13318	6	OP50	M10	0.0189119	-0.727063	-0.447535
VC20416	-0.765365	0.134622	10	HT115	M10	0.00635487	-0.861668	-0.669063
VC20416	-0.764363	0.157064	8	NA22	M10	0.00635487	-0.895672	-0.633055
VC20416	-0.805139	0.136627	6	OP50	M10	0.00635487	-0.94852	-0.661758
VC20127	0.397585	0.132741	10	HT115	M10	0.020299	0.302628	0.492543
VC20127	0.203477	0.126335	8	NA22	M10	0.020299	0.0978575	0.309096
VC20127	0.346701	0.091643	6	OP50	M10	0.020299	0.250528	0.442875
VC30159	-0.50045	0.0722196	10	HT115	M10	0.0257369	-0.552112	-0.448787
VC30159	-0.476432	0.152453	8	NA22	M10	0.0257369	-0.603885	-0.348978
VC30159	-0.48646	0.165914	6	OP50	M10	0.0257369	-0.660576	-0.312344
VC20007	-0.642542	0.14816	10	HT115	M10	0.00784354	-0.74853	-0.536555
VC20007	-0.349732	0.0819937	8	NA22	M10	0.00784354	-0.41828	-0.281183
VC20007	-0.591258	0.126414	6	OP50	M10	0.00784354	-0.723921	-0.458594
VC20472	-0.40511	0.101259	10	HT115	M10	0.0126391	-0.477546	-0.332674
VC20472	-0.495267	0.110633	8	NA22	M10	0.0126391	-0.587759	-0.402775
VC20472	-0.533814	0.0651524	6	OP50	M10	0.0126391	-0.602187	-0.465441
VC30175	-1.34332	0.154994	10	HT115	M10	0.0145656	-1.4542	-1.23244
VC30175	-1.30583	0.310994	8	NA22	M10	0.0145656	-1.56583	-1.04583
VC30175	-1.79047	1.04225	6	OP50	M10	0.0145656	-2.88424	-0.696699
VC40448	-1.13992	0.245819	10	HT115	M10	0.0141356	-1.31577	-0.96407
VC40448	-1.55546	0.202456	8	NA22	M10	0.0141356	-1.72472	-1.38621
VC40448	-1.29323	0.153812	6	OP50	M10	0.0141356	-1.45464	-1.13181
VC20433	-0.0734514	0.108149	10	HT115	M10	0.0225248	-0.150816	0.00391352
VC20433	0.177636	0.0781008	8	NA22	M10	0.0225248	0.112342	0.242929
VC20433	0.0149685	0.113409	6	OP50	M10	0.0225248	-0.104047	0.133984
VC20678	-0.878751	0.058867	10	HT115	M10	0.0104305	-0.920861	-0.83664
VC20678	-0.866085	0.198418	8	NA22	M10	0.0104305	-1.03197	-0.700203
VC20678	-1.07388	0.295659	6	OP50	M10	0.0104305	-1.38416	-0.763609
VC20111	-0.142883	0.122924	10	HT115	M10	0.0183829	-0.230818	-0.0549492
VC20111	0.00158798	0.187046	8	NA22	M10	0.0183829	-0.154786	0.157962
VC20111	-0.0921959	0.202442	6	OP50	M10	0.0183829	-0.304646	0.120254
VC20438	-0.40536	0.0916496	10	HT115	M10	0.0108648	-0.470922	-0.339798
VC20438	-0.120565	0.204162	8	NA22	M10	0.0108648	-0.291248	0.0501187
VC20438	-0.39158	0.10749	6	OP50	M10	0.0108648	-0.504384	-0.278776
VC20484	-0.57916	0.0551867	10	HT115	M10	0.0110789	-0.618638	-0.539682
VC20484	-0.434467	0.139816	8	NA22	M10	0.0110789	-0.551356	-0.317577
VC20484	-0.666874	0.240241	6	OP50	M10	0.0110789	-0.918991	-0.414757
VC20146	-0.519389	0.132904	10	HT115	M10	0.00530775	-0.614463	-0.424315
VC20146	-0.37229	0.153406	8	NA22	M10	0.00530775	-0.500541	-0.24404
VC20146	-0.530115	0.152307	6	OP50	M10	0.00530775	-0.689952	-0.370278
VC20151	-0.379513	0.0848645	10	HT115	M10	0.0217662	-0.440222	-0.318805
VC20151	-0.289556	0.222842	8	NA22	M10	0.0217662	-0.475857	-0.103255
VC20151	-0.327299	0.161417	6	OP50	M10	0.0217662	-0.496696	-0.157902
VC20009	-0.276399	0.117451	10	HT115	M10	0.0261156	-0.360419	-0.19238
VC20009	-0.18007	0.20263	8	NA22	M10	0.0261156	-0.349472	-0.0106668
VC20009	-0.213647	0.174909	6	OP50	M10	0.0261156	-0.397202	-0.0300906
VC20164	-0.446337	0.0328422	10	HT115	M10	0.0119802	-0.469831	-0.422843
VC20164	-0.403814	0.0761361	8	NA22	M10	0.0119802	-0.467465	-0.340162
VC20164	-0.45098	0.142337	6	OP50	M10	0.0119802	-0.600354	-0.301607
VC20428	0.115817	0.0712469	10	HT115	M10	0.0308305	0.06485	0.166784
VC20428	0.0990551	0.131796	8	NA22	M10	0.0308305	-0.0111288	0.209239
VC20428	0.325538	0.0572834	6	OP50	M10	0.0308305	0.265423	0.385653
VC20573	-0.516637	0.130441	10	HT115	M10	0.0147045	-0.609949	-0.423325
VC20573	-0.477028	0.206776	8	NA22	M10	0.0147045	-0.649897	-0.304159
VC20573	-0.607368	0.123356	6	OP50	M10	0.0147045	-0.736822	-0.477913
VC30012	0.200674	0.0778614	10	HT115	M10	0.03367	0.144975	0.256373
VC30012	0.341458	0.113282	8	NA22	M10	0.03367	0.246752	0.436164
VC30012	0.314733	0.0690565	6	OP50	M10	0.03367	0.242262	0.387203
VC20145	0.468216	0.091003	10	HT115	M10	0.0146504	0.403116	0.533316
VC20145	0.13109	0.220758	8	NA22	M10	0.0146504	-0.0534686	0.315648
VC20145	0.0890899	0.214232	6	OP50	M10	0.0146504	-0.135733	0.313913
VC20475	-0.282484	0.0927314	10	HT115	M10	0.0217137	-0.34882	-0.216148
VC20475	-0.752045	0.206189	8	NA22	M10	0.0217137	-0.924423	-0.579666
VC20475	-0.756336	0.263629	6	OP50	M10	0.0217137	-1.033	-0.479675
VC30081	-0.378297	0.104126	10	HT115	M10	0.00824048	-0.452784	-0.303809
VC30081	-0.53643	0.0897541	8	NA22	M10	0.00824048	-0.611466	-0.461394
VC30081	-0.459497	0.0268993	6	OP50	M10	0.00824048	-0.487726	-0.431268
VC40402	-0.339477	0.112732	10	HT115	M10	0.0326224	-0.420121	-0.258834
VC40402	-0.293611	0.156983	8	NA22	M10	0.0326224	-0.424852	-0.16237
VC40402	-0.217289	0.148906	6	OP50	M10	0.0326224	-0.373556	-0.0610214
VC20424	-0.240256	0.134187	10	HT115	M10	0.0309777	-0.336247	-0.144264
VC20424	-0.297565	0.192886	8	NA22	M10	0.0309777	-0.458821	-0.136308
VC20424	-0.416419	0.189132	6	OP50	M10	0.0309777	-0.614901	-0.217938
VC20437	-0.434335	0.0857522	10	HT115	M10	0.00944592	-0.495679	-0.372992
VC20437	-0.210142	0.106593	8	NA22	M10	0.00944592	-0.299257	-0.121028
VC20437	-0.257583	0.2052	6	OP50	M10	0.00944592	-0.472927	-0.0422378
VC20133	-0.143833	0.125892	10	HT115	M10	0.0170399	-0.233891	-0.0537757
VC20133	0.415509	0.0645041	8	NA22	M10	0.0170399	0.361582	0.469436
VC20133	0.207461	0.155005	6	OP50	M10	0.0170399	0.0447933	0.370128
VC20439	-0.0319883	0.109951	10	HT115	M10	0.0124392	-0.110642	0.0466656
VC20439	-0.341674	0.0528894	8	NA22	M10	0.0124392	-0.385891	-0.297458
VC20439	-0.0469644	0.173144	6	OP50	M10	0.0124392	-0.228668	0.134739
VC20571	-0.337877	0.105344	10	HT115	M10	0.00816201	-0.413236	-0.262519
VC20571	-0.562965	0.120285	8	NA22	M10	0.00816201	-0.663526	-0.462404
VC20571	-0.373443	0.103695	6	OP50	M10	0.00816201	-0.482265	-0.264622
VC20046	-0.486286	0.0898563	10	HT115	M10	0.0160779	-0.550565	-0.422007
VC20046	-0.440495	0.0832061	8	NA22	M10	0.0160779	-0.510057	-0.370933
VC20046	-0.593041	0.159491	6	OP50	M10	0.0160779	-0.760417	-0.425665
VC40928	-0.361064	0.0740948	10	HT115	M10	0.0104126	-0.414069	-0.30806
VC40928	-0.256152	0.153136	8	NA22	M10	0.0104126	-0.384177	-0.128128
VC40928	-0.227074	0.212284	6	OP50	M10	0.0104126	-0.449852	-0.00429551
VC30170	-0.0429253	0.0959215	10	HT115	M10	0.0148172	-0.111543	0.0256928
VC30170	-0.0221156	0.193878	8	NA22	M10	0.0148172	-0.184202	0.139971
VC30170	-0.110534	0.215956	6	OP50	M10	0.0148172	-0.337166	0.116097
VC20506	-0.569895	0.0883557	10	HT115	M10	0.0145291	-0.633101	-0.506689
VC20506	-0.497572	0.0294547	8	NA22	M10	0.0145291	-0.522197	-0.472948
VC20506	-0.563716	0.0602023	6	OP50	M10	0.0145291	-0.626895	-0.500538
VC20131	-0.34039	0.138519	10	HT115	M10	0.0240639	-0.43948	-0.241299
VC20131	0.0252682	0.1028	8	NA22	M10	0.0240639	-0.0606749	0.111211
VC20131	-0.0835592	0.116222	6	OP50	M10	0.0240639	-0.205527	0.0384083
VC20048	-0.548433	0.0463568	10	HT115	M10	0.0231172	-0.581594	-0.515271
VC20048	-0.501826	0.130589	8	NA22	M10	0.0231172	-0.611001	-0.392651
VC20048	-0.613708	0.180324	6	OP50	M10	0.0231172	-0.802946	-0.42447
VC20474	-0.517734	0.0918156	10	HT115	M10	0.0150939	-0.583415	-0.452053
VC20474	-0.502641	0.114506	8	NA22	M10	0.0150939	-0.598371	-0.406912
VC20474	-0.626371	0.112682	6	OP50	M10	0.0150939	-0.744624	-0.508119
VC20019	-0.0556278	0.0815093	10	HT115	M11	0.0181766	-0.113936	0.00268049
VC20019	0.143867	0.109848	8	NA22	M11	0.0181766	0.0520325	0.235702
VC20019	-0.0697965	0.266798	6	OP50	M11	0.0181766	-0.349784	0.210191
VC20739	0.237252	0.184413	10	HT115	M11	0.0215614	0.105331	0.369174
VC20739	0.0649341	0.174584	8	NA22	M11	0.0215614	-0.0810214	0.21089
VC20739	0.397061	0.125147	6	OP50	M11	0.0215614	0.265727	0.528395
VC20405	-0.0728688	0.0664458	10	HT115	M11	0.0245243	-0.120401	-0.0253363
VC20405	-0.199211	0.197947	8	NA22	M11	0.0245243	-0.364699	-0.0337234
VC20405	-0.178277	0.139011	6	OP50	M11	0.0245243	-0.32416	-0.0323939
VC20165	-0.245471	0.137792	10	HT115	M11	0.0179867	-0.344042	-0.146901
VC20165	0.0650742	0.143208	8	NA22	M11	0.0179867	-0.0546506	0.184799
VC20165	-0.130941	0.274652	6	OP50	M11	0.0179867	-0.419171	0.157288
VC20697	-0.20944	0.139334	10	HT115	M11	0.0196371	-0.309114	-0.109767
VC20697	-0.51878	0.0873819	8	NA22	M11	0.0196371	-0.591833	-0.445727
VC20697	-0.535971	0.0611518	6	OP50	M11	0.0196371	-0.600146	-0.471796
VC20675	-0.506831	0.104995	10	HT115	M11	0.0190702	-0.58194	-0.431722
VC20675	-0.378394	0.110508	8	NA22	M11	0.0190702	-0.470781	-0.286007
VC20675	-0.356275	0.289297	6	OP50	M11	0.0190702	-0.659873	-0.0526767
VC20475	-0.299948	0.298389	10	HT115	M11	0.0284045	-0.513403	-0.0864935
VC20475	-0.438876	0.167839	8	NA22	M11	0.0284045	-0.579193	-0.298559
VC20475	-0.615843	0.0958241	6	OP50	M11	0.0284045	-0.716405	-0.515282
VC30081	-0.483518	0.166505	10	HT115	M11	0.0118911	-0.602629	-0.364408
VC30081	-0.494668	0.119184	8	NA22	M11	0.0118911	-0.594308	-0.395028
VC30081	-0.665467	0.108868	6	OP50	M11	0.0118911	-0.779717	-0.551217
VC40402	-0.164975	0.236369	10	HT115	M11	0.029372	-0.334063	0.00411361
VC40402	-0.0218504	0.173807	8	NA22	M11	0.029372	-0.167157	0.123456
VC40402	-0.101468	0.28037	6	OP50	M11	0.029372	-0.395698	0.192762
VC20460	-0.895356	0.136928	10	HT115	M11	0.0296662	-0.993309	-0.797403
VC20460	-1.0369	0.271817	8	NA22	M11	0.0296662	-1.26415	-0.809658
VC20460	-0.915242	0.18482	6	OP50	M11	0.0296662	-1.1092	-0.721285
VC20465	-0.465363	0.109194	10	HT115	M11	0.0171605	-0.543475	-0.38725
VC20465	-0.369127	0.146519	8	NA22	M11	0.0171605	-0.49162	-0.246634
VC20465	-0.318133	0.176004	6	OP50	M11	0.0171605	-0.502837	-0.133428
VC20577	0.23829	0.071468	10	HT115	M11	0.0197185	0.187165	0.289415
VC20577	0.184742	0.139062	8	NA22	M11	0.0197185	0.0684831	0.301001
VC20577	0.0763812	0.152294	6	OP50	M11	0.0197185	-0.0834411	0.236204
VC20734	-0.74054	0.371557	10	HT115	M11	0.0127937	-1.00634	-0.474744
VC20734	-0.745558	0.392255	8	NA22	M11	0.0127937	-1.07349	-0.417624
VC20734	-0.873524	0.328081	6	OP50	M11	0.0127937	-1.21782	-0.529224
VC20500	-0.261613	0.0876121	10	HT115	M11	0.00768719	-0.324287	-0.198939
VC20500	-0.47206	0.109806	8	NA22	M11	0.00768719	-0.56386	-0.38026
VC20500	-0.168446	0.16597	6	OP50	M11	0.00768719	-0.342621	0.00572959
VC20407	0.181851	0.218072	10	HT115	M11	0.0281905	0.0258523	0.33785
VC20407	0.0111092	0.450148	8	NA22	M11	0.0281905	-0.365224	0.387443
VC20407	-0.23968	0.238496	6	OP50	M11	0.0281905	-0.489966	0.0106059
VC20510	-0.393888	0.0894329	10	HT115	M11	0.0125561	-0.457864	-0.329911
VC20510	-0.201761	0.176559	8	NA22	M11	0.0125561	-0.349368	-0.0541546
VC20510	-0.422708	0.112978	6	OP50	M11	0.0125561	-0.54127	-0.304145
VC20420	-0.419938	0.16748	10	HT115	M11	0.0150091	-0.539747	-0.30013
VC20420	-0.395361	0.0998874	8	NA22	M11	0.0150091	-0.478869	-0.311853
VC20420	-0.499733	0.206443	6	OP50	M11	0.0150091	-0.716382	-0.283084
VC20472	-0.483998	0.136556	10	HT115	M11	0.0151616	-0.581684	-0.386312
VC20472	-0.503748	0.141239	8	NA22	M11	0.0151616	-0.621826	-0.385669
VC20472	-0.52498	0.198855	6	OP50	M11	0.0151616	-0.733665	-0.316295
VC30175	-1.2102	0.281035	10	HT115	M11	0.0208789	-1.41124	-1.00916
VC30175	-1.11276	0.2836	8	NA22	M11	0.0208789	-1.34985	-0.875662
VC30175	-1.37622	0.327056	6	OP50	M11	0.0208789	-1.71944	-1.03299
VC20701	-0.215672	0.194234	10	HT115	M11	0.0250628	-0.354619	-0.0767256
VC20701	-0.0230642	0.081826	8	NA22	M11	0.0250628	-0.0914724	0.0453441
VC20701	-0.142346	0.352905	6	OP50	M11	0.0250628	-0.512697	0.228005
VC20614	-0.275997	0.163418	10	HT115	M11	0.0187804	-0.392899	-0.159095
VC20614	-0.312255	0.178039	8	NA22	M11	0.0187804	-0.4611	-0.163411
VC20614	-0.294462	0.252296	6	OP50	M11	0.0187804	-0.55923	-0.0296934
VC20612	-0.263863	0.0648728	10	HT115	M11	0.0171235	-0.310271	-0.217456
VC20612	-0.547261	0.0939636	8	NA22	M11	0.0171235	-0.625816	-0.468705
VC20612	-0.465537	0.126225	6	OP50	M11	0.0171235	-0.598002	-0.333073
VC20427	-0.488544	0.19968	10	HT115	M11	0.00855248	-0.631387	-0.345701
VC20427	-0.453281	0.115035	8	NA22	M11	0.00855248	-0.549452	-0.357109
VC20427	-0.609456	0.198929	6	OP50	M11	0.00855248	-0.818219	-0.400693
VC40443	-0.593047	0.139588	10	HT115	M11	0.0129702	-0.692903	-0.493192
VC40443	-0.608404	0.179511	8	NA22	M11	0.0129702	-0.758479	-0.458329
VC40443	-0.585635	0.103884	6	OP50	M11	0.0129702	-0.694654	-0.476616
VC20484	-0.531878	0.091507	10	HT115	M11	0.0165303	-0.597339	-0.466418
VC20484	-0.137857	0.219841	8	NA22	M11	0.0165303	-0.321649	0.0459347
VC20484	-0.471825	0.214591	6	OP50	M11	0.0165303	-0.697024	-0.246625
VC40922	-0.681589	0.120105	10	HT115	M11	0.0227714	-0.767507	-0.595671
VC40922	-0.629709	0.146543	8	NA22	M11	0.0227714	-0.752222	-0.507196
VC40922	-0.719447	0.219646	6	OP50	M11	0.0227714	-0.949951	-0.488943
VC40053	-0.726125	0.195816	10	HT115	M11	0.00936221	-0.866204	-0.586047
VC40053	-0.591473	0.174205	8	NA22	M11	0.00936221	-0.737112	-0.445833
VC40053	-0.682982	0.165193	6	OP50	M11	0.00936221	-0.856342	-0.509622
VC20452	-0.285506	0.117622	10	HT115	M11	0.00912224	-0.369647	-0.201364
VC20452	-0.0869275	0.176676	8	NA22	M11	0.00912224	-0.234632	0.060777
VC20452	-0.229856	0.202962	6	OP50	M11	0.00912224	-0.442852	-0.01686
VC20558	-0.493128	0.127377	10	HT115	M11	0.0184608	-0.584248	-0.402008
VC20558	-0.427263	0.162196	8	NA22	M11	0.0184608	-0.562862	-0.291664
VC20558	-0.446827	0.224012	6	OP50	M11	0.0184608	-0.681913	-0.211741
VC20046	-0.365503	0.165936	10	HT115	M11	0.02276	-0.484207	-0.2468
VC20046	-0.376133	0.145767	8	NA22	M11	0.02276	-0.497997	-0.254269
VC20046	-0.442909	0.281829	6	OP50	M11	0.02276	-0.73867	-0.147147
VC20463	-0.27649	0.104995	10	HT115	M11	0.00870384	-0.351599	-0.201382
VC20463	-0.274068	0.139365	8	NA22	M11	0.00870384	-0.390581	-0.157556
VC20463	-0.26363	0.152929	6	OP50	M11	0.00870384	-0.424119	-0.10314
VC20135	-0.362438	0.101728	10	HT115	M11	0.0168641	-0.435209	-0.289666
VC20135	0.0348331	0.12102	8	NA22	M11	0.0168641	-0.0663425	0.136009
VC20135	-0.212819	0.295258	6	OP50	M11	0.0168641	-0.522673	0.097035
VC40448	-0.771042	0.136641	10	HT115	M11	0.0209119	-0.86879	-0.673295
VC40448	-1.12509	0.29771	8	NA22	M11	0.0209119	-1.37398	-0.876198
VC40448	-0.838595	0.354696	6	OP50	M11	0.0209119	-1.21083	-0.466364
VC40403	-0.612518	0.181789	10	HT115	M11	0.00652945	-0.742561	-0.482474
VC40403	-0.458637	0.228107	8	NA22	M11	0.00652945	-0.649339	-0.267934
VC40403	-0.438808	0.0454207	6	OP50	M11	0.00652945	-0.486474	-0.391142
VC20711	0.0935203	0.140456	10	HT115	M11	0.0145391	-0.00695582	0.193996
VC20711	0.311837	0.148648	8	NA22	M11	0.0145391	0.187564	0.43611
VC20711	0.0872414	0.25314	6	OP50	M11	0.0145391	-0.178412	0.352895
VC20159	-0.282092	0.116484	10	HT115	M11	0.0171948	-0.36542	-0.198764
VC20159	-0.0780636	0.0944957	8	NA22	M11	0.0171948	-0.157064	0.000936757
VC20159	-0.286681	0.26115	6	OP50	M11	0.0171948	-0.560741	-0.012621
VC20569	-0.248274	0.14055	10	HT115	M11	0.0199567	-0.348817	-0.147731
VC20569	0.00394573	0.180265	8	NA22	M11	0.0199567	-0.14676	0.154651
VC20569	-0.0961319	0.281199	6	OP50	M11	0.0199567	-0.391232	0.198968
VC20123	-0.159822	0.146901	10	HT115	M11	0.022784	-0.264909	-0.0547357
VC20123	-0.479136	0.109722	8	NA22	M11	0.022784	-0.570866	-0.387406
VC20123	-0.472315	0.172588	6	OP50	M11	0.022784	-0.653435	-0.291195
VC20446	-0.666291	0.210104	10	HT115	M11	0.00994994	-0.81659	-0.515992
VC20446	-0.636633	0.217121	8	NA22	M11	0.00994994	-0.818151	-0.455115
VC20446	-0.839725	0.17974	6	OP50	M11	0.00994994	-1.02835	-0.651099
VC20169	-0.24953	0.141948	10	HT115	M11	0.021338	-0.351073	-0.147986
VC20169	0.226967	0.256985	8	NA22	M11	0.021338	0.0121218	0.441812
VC20169	-0.216758	0.321806	6	OP50	M11	0.021338	-0.554473	0.120957
VC20409	-0.418637	0.0990818	10	HT115	M11	0.00682154	-0.489516	-0.347758
VC20409	-0.408105	0.0807404	8	NA22	M11	0.00682154	-0.475606	-0.340604
VC20409	-0.523376	0.188124	6	OP50	M11	0.00682154	-0.7208	-0.325952
VC20503	-0.108736	0.0871689	10	HT115	M11	0.0271943	-0.171093	-0.0463788
VC20503	-0.159159	0.175312	8	NA22	M11	0.0271943	-0.305724	-0.0125943
VC20503	-0.223613	0.194415	6	OP50	M11	0.0271943	-0.427639	-0.0195868
VC20162	-0.510024	0.140078	10	HT115	M11	0.0139287	-0.61023	-0.409818
VC20162	-0.472051	0.115034	8	NA22	M11	0.0139287	-0.568222	-0.37588
VC20162	-0.641363	0.138365	6	OP50	M11	0.0139287	-0.786569	-0.496158
VC40928	-0.420703	0.12801	10	HT115	M11	0.0220333	-0.512276	-0.32913
VC40928	-0.326939	0.109656	8	NA22	M11	0.0220333	-0.418614	-0.235265
VC40928	-0.286695	0.223246	6	OP50	M11	0.0220333	-0.520977	-0.0524123
VC20725	-0.748613	0.144566	10	HT115	M11	0.0158383	-0.85203	-0.645197
VC20725	-1.1959	0.0758052	8	NA22	M11	0.0158383	-1.25927	-1.13252
VC20725	-0.927682	0.146936	6	OP50	M11	0.0158383	-1.08188	-0.773482
VC20126	-0.118918	0.202289	10	HT115	M11	0.0113842	-0.263627	0.0257908
VC20126	-0.246787	0.117299	8	NA22	M11	0.0113842	-0.344852	-0.148723
VC20126	-0.360241	0.260639	6	OP50	M11	0.0113842	-0.633765	-0.0867169
VC20499	-0.322755	0.113382	10	HT115	M11	0.0123876	-0.403864	-0.241647
VC20499	-0.421185	0.103429	8	NA22	M11	0.0123876	-0.507654	-0.334717
VC20499	-0.299716	0.168123	6	OP50	M11	0.0123876	-0.47615	-0.123282
VC20686	0.494502	0.0623758	10	HT115	M11	0.0236796	0.449881	0.539123
VC20686	0.347137	0.1695	8	NA22	M11	0.0236796	0.205431	0.488843
VC20686	0.432844	0.20578	6	OP50	M11	0.0236796	0.216891	0.648797
VC20142	-0.983145	0.375132	10	HT115	M11	0.020754	-1.2515	-0.714791
VC20142	-0.809177	0.295196	8	NA22	M11	0.020754	-1.05597	-0.562387
VC20142	-1.04389	0.291271	6	OP50	M11	0.020754	-1.34956	-0.73822
VC40223	-0.863339	0.251917	10	HT115	M11	0.0107646	-1.04355	-0.683129
VC40223	-0.903996	0.326633	8	NA22	M11	0.0107646	-1.17707	-0.630923
VC40223	-0.621769	0.0902189	6	OP50	M11	0.0107646	-0.716448	-0.52709
VC40749	-0.56826	0.210923	10	HT115	M11	0.0203426	-0.719145	-0.417375
VC40749	-0.311954	0.249397	8	NA22	M11	0.0203426	-0.520455	-0.103453
VC40749	-0.595707	0.231116	6	OP50	M11	0.0203426	-0.838248	-0.353165
VC20471	-0.666441	0.170919	10	HT115	M11	0.0244575	-0.788709	-0.544172
VC20471	-0.530362	0.075938	8	NA22	M11	0.0244575	-0.593847	-0.466876
VC20471	-0.645586	0.244233	6	OP50	M11	0.0244575	-0.901893	-0.389279
VC20594	0.340997	0.09658	10	HT115	M11	0.0373375	0.271908	0.410087
VC20594	0.197995	0.137196	8	NA22	M11	0.0373375	0.0832963	0.312694
VC20594	0.118829	0.231559	6	OP50	M11	0.0373375	-0.124177	0.361835
VC20478	-0.880329	0.212877	10	HT115	M11	0.0200993	-1.03261	-0.728046
VC20478	-0.746599	0.158363	8	NA22	M11	0.0200993	-0.878994	-0.614204
VC20478	-0.773836	0.166698	6	OP50	M11	0.0200993	-0.948775	-0.598896
VC20345	-0.505286	0.143481	10	HT115	M11	0.0146989	-0.607926	-0.402646
VC20345	-0.461301	0.109879	8	NA22	M11	0.0146989	-0.553163	-0.36944
VC20345	-0.461804	0.130001	6	OP50	M11	0.0146989	-0.598231	-0.325377
VC20750	-0.347949	0.104905	10	HT115	M11	0.010456	-0.422993	-0.272904
VC20750	0.0240765	0.20394	8	NA22	M11	0.010456	-0.146422	0.194575
VC20750	0.0291924	0.16751	6	OP50	M11	0.010456	-0.146599	0.204984
VC20666	-0.597766	0.119176	10	HT115	M11	0.0152486	-0.683019	-0.512513
VC20666	-0.34839	0.197007	8	NA22	M11	0.0152486	-0.513092	-0.183689
VC20666	-0.438961	0.135808	6	OP50	M11	0.0152486	-0.581482	-0.296439
VC20448	-0.418169	0.0817921	10	HT115	M11	0.00849002	-0.476679	-0.359658
VC20448	-0.488931	0.0961646	8	NA22	M11	0.00849002	-0.569327	-0.408536
VC20448	-0.542213	0.106351	6	OP50	M11	0.00849002	-0.653821	-0.430604
VC40025	0.238902	0.299967	10	HT115	M11	0.0153152	0.0243185	0.453485
VC40025	-0.0569298	0.305297	8	NA22	M11	0.0153152	-0.312165	0.198305
VC40025	0.113961	0.183911	6	OP50	M11	0.0153152	-0.0790418	0.306965
