# Supplementary material
Source: publisher figshare collection journal article supplement (https://gsajournals.figshare.com/articles/dataset/_/12869570)
Supplement: Supplementary file 2 [file 2]

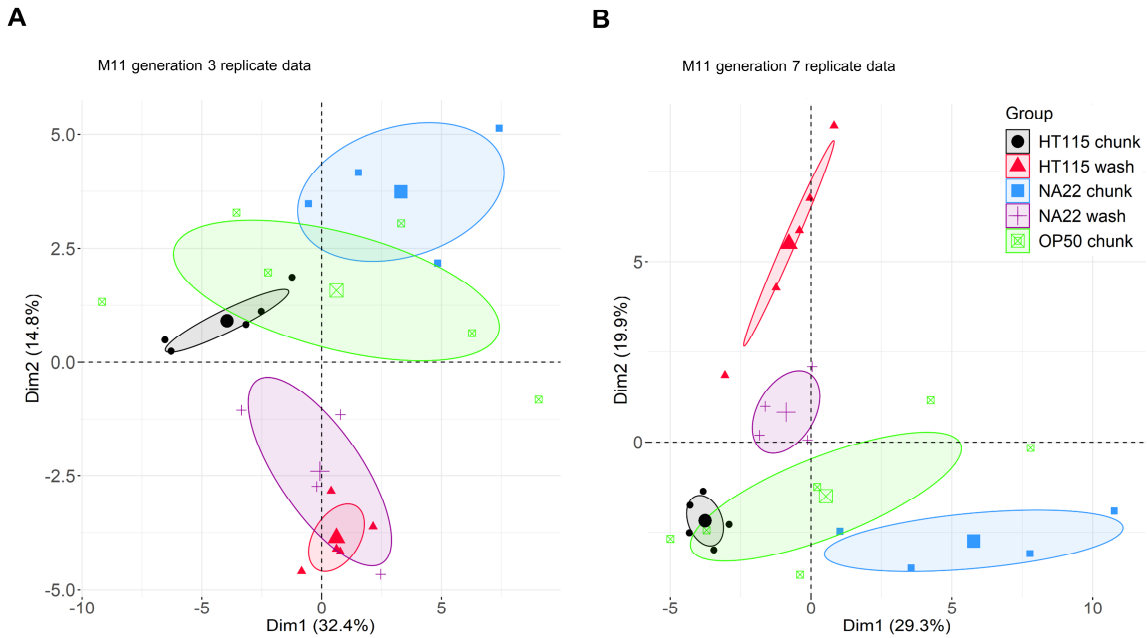

**Supplemental Figure S4. Principal component analysis of M11 samples suggest condition-dependent population structure.** PCA of pool M11 replicate datasets separated into (A) generation 3 and (B) generation 7. Samples are projected along principal components 1 and 2 for each individual data set and identified by combination of food source and transfer method. Large points represent the center of each cluster with the shaded area representing an ellipse with 95% confidence level.
