# Supplementary material
Source: publisher figshare collection journal article supplement (https://gsajournals.figshare.com/articles/dataset/_/12869570)
Supplement: Supplementary file 3 [file 2]

**Supplemental Table S2. Candidate ED3052 variants for *emb-27* RNAi suppression**

| Allele identifier | Location          | gene                         | Mutation type                     | AA change                       |
|-------------------|-------------------|------------------------------|-----------------------------------|---------------------------------|
| WBVar02099454     | III:149449        | <i>ver-2</i> <sup>a</sup>    | Complex 13N indel                 | Unknown                         |
| WBVar01685921     | III:152969        | <i>adbp-2</i> <sup>a</sup>   | Missense                          | L68F                            |
| WBVar01685930     | III:941480        | <i>fbxa-59</i>               | Missense                          | K131E                           |
| WBVar01667129     | III:952024        | <i>fbxa-11</i>               | Missense                          | N286S                           |
| WBVar01686483     | III:1983921       | <i>Y39A3B.7</i>              | Missense                          | G73A                            |
| WBVar02007708     | III:3054168       | <i>H06I04.5</i> <sup>a</sup> | Deletion, frame shift             | Complex                         |
| WBVar02099550     | III:3055100       | <i>H06I04.5</i> <sup>a</sup> | Complex change, frame shift       | Affected by previous frameshift |
| WBVar01686754     | III:3081169       | <i>H06I04.3</i>              | Missense                          | E561K                           |
| WBVar02122116     | III:922012-988011 | multiple <sup>b</sup>        | 66kb CNV deletion, non-homozygous |                                 |

<sup>a</sup> classified as a pseudogene on Wormbase

<sup>b</sup> 16 protein coding genes, 2 ncRNAs, 3 pseudogenes
