# Supplementary material
Source: publisher figshare collection journal article supplement (https://gsajournals.figshare.com/articles/dataset/_/12869570)
Supplement: Supplementary file 4 [file 2]

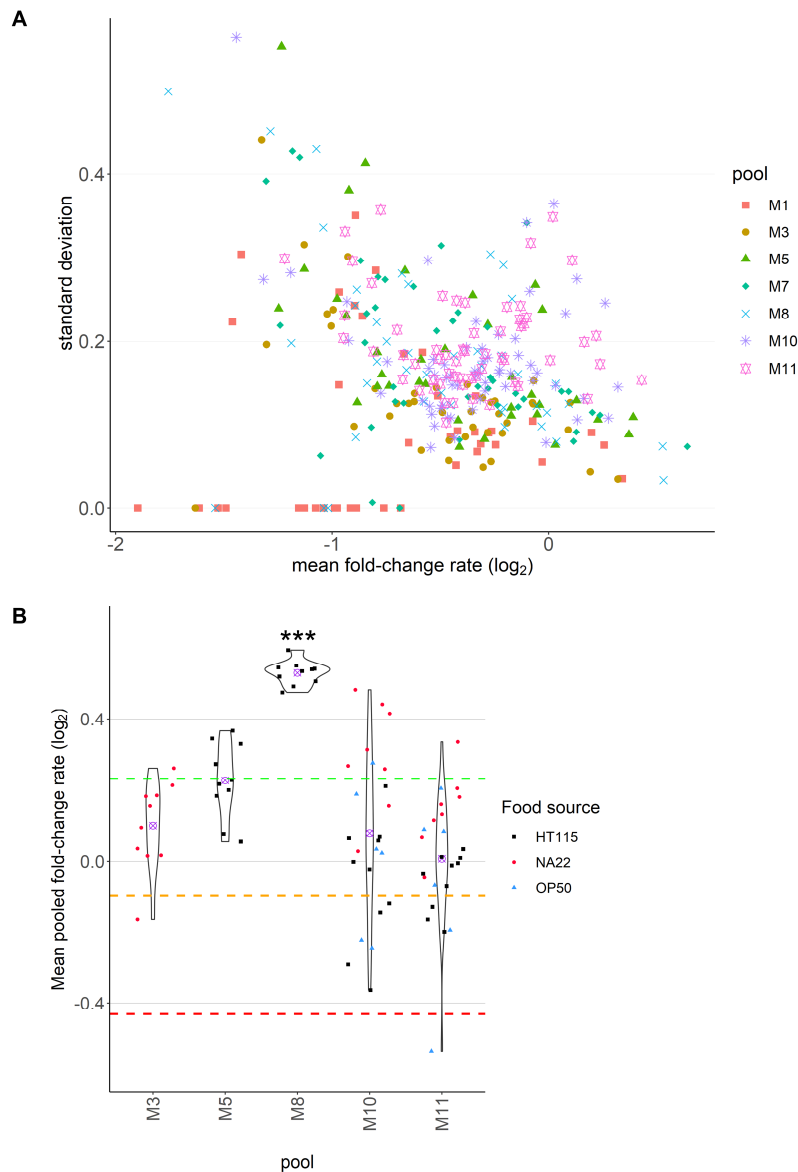

**Supplemental Figure S7. Analysis of mean FCR across pooled datasets.** (A) Scatterplot of mean FCR versus standard deviation of the mean FCR suggests a weak negative Spearman rank correlation between the two values in pools M3, M5, M7, M8 ranging between  $r=[-0.62, -0.39]$ ,  $p < 0.01$ . Combining pools, the values do not correlate ( $r=-0.20$ ,  $p < 0.001$ ). (B) Violin plots for VC20019 replicates in each pool were generated with M11 represented by combining datasets based on food source. M8 replicate data is significantly different compared to M3, M5, M10 and M11 which are not significantly different from each other. Each violin plot discriminates between food sources HT115 (black squares), NA22 (red circles) and OP50 (blue triangles) and mean FCR (purple  $\otimes$ ). Coloured dotted lines represent category boundaries using an FCR of -0.4315 (red), -0.0985 (yellow), and 0.2327 (green). \*\*\*  $p < 0.001$  for M8 samples versus all other pools by Wilcoxon rank-sum test with p-values adjusted for multiple testing by Benjamini-Hochberg method.
