# Supplementary material
Source: publisher figshare collection journal article supplement (https://gsajournals.figshare.com/articles/dataset/_/12869570)
Supplement: Supplementary file 5 [file 2]

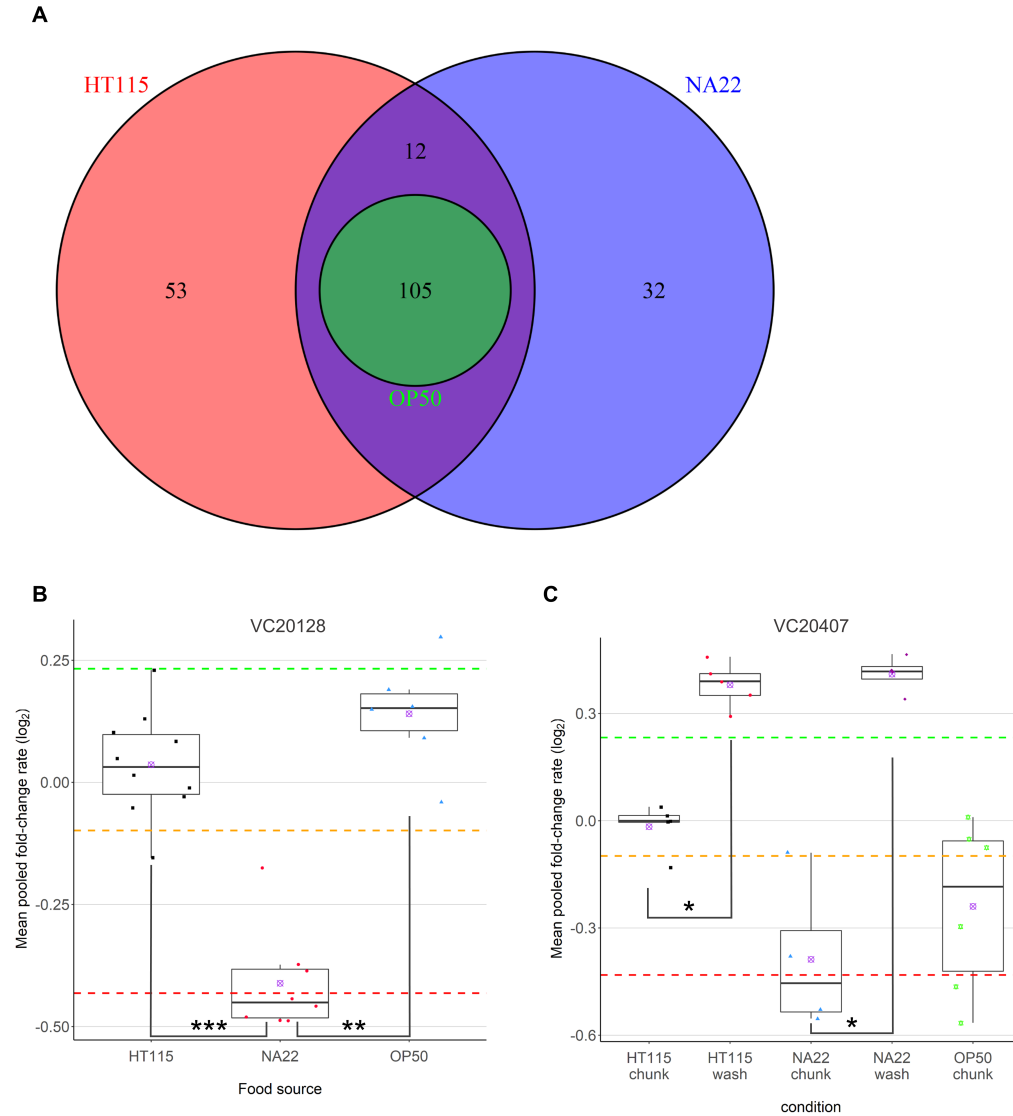

**Supplemental figure S6. MMP strains were tested across a trio of food sources.** (A) Venn diagram of each food source used in the PhenoMIP assays and the number of strains tested with HT115 (pink), NA22 (purple) and OP50 (green). 105 strains were tested on all three food conditions. (B) VC20128 data from the same pool (M10) suggests specific fitness differences between growth on NA22 (n=10 biological replicates) versus growth on HT115 ((n=8 biological replicates) and OP50 ((n=6 biological replicates). (C) VC20407 data from the same pool (M11) suggests significant changes to growth when comparing samples transferred by chunking (HT115 chunk, n=5 biological replicates; NA22 chunk, n=4 biological replicates) versus washing (HT115 wash, n=5 biological replicates; NA22 wash, n=4 biological replicates) – regardless of food source. Coloured dotted lines represent category boundaries using an FCR of -0.4315 (red), -0.0985 (yellow), and 0.2327 (green). The mean of each population is represented by a purple  $\otimes$ . \*  $p < 0.05$ ; \*\*  $p < 0.01$ ; \*\*\*  $p < 0.001$  by Wilcoxon rank-sum test with p-values adjusted for multiple testing by Benjamini-Hochberg method.
