# Supplementary material
Source: publisher figshare collection journal article supplement (https://gsajournals.figshare.com/articles/dataset/_/12869570)
Supplement: Supplementary file 8 [file 2]

**Supplemental Table S1. Class 0 mutants, not analysed due to low abundance at experimental start**

| Strain  | Pool(s) | Initial abundance |
|---------|---------|-------------------|
| VC20190 | M5      | 0.00180 / 0.00077 |
| VC20245 | M1 / M3 | 0.00027 / 0.00026 |
| VC20262 | M5      | 0.00074 / 0.00128 |
| VC20315 | M1 / M3 | 0.00000 / 0.00059 |
| VC20328 | M1 / M3 | 0.00136 / 0.00216 |
| VC20338 | M5      | 0.00166 / 0.00209 |
| VC40291 | M1 / M3 | 0.00114 / 0.00000 |
| VC40296 | M5      | 0.00118 / 0.00017 |
| VC40545 | M1 / M3 | 0.00064 / 0.00017 |
| VC40611 | M1 / M3 | 0.00000 / 0.00034 |
| VC40697 | M1 / M3 | 0.00176 / 0.00219 |
| VC40745 | M5      | 0.00098 / 0.00118 |
| VC40747 | M1 / M3 | 0.00151 / 0.00147 |
| VC40788 | M1 / M3 | 0.00038 / 0.00029 |
| VC40804 | M1 / M3 | 0.00054 / 0.00036 |
