# Supplementary material
Source: publisher figshare collection journal article supplement (https://gsajournals.figshare.com/articles/dataset/_/12869570)
Supplement: Supplementary file 9 [file 2]

**A****Strain abundance by genomic sample**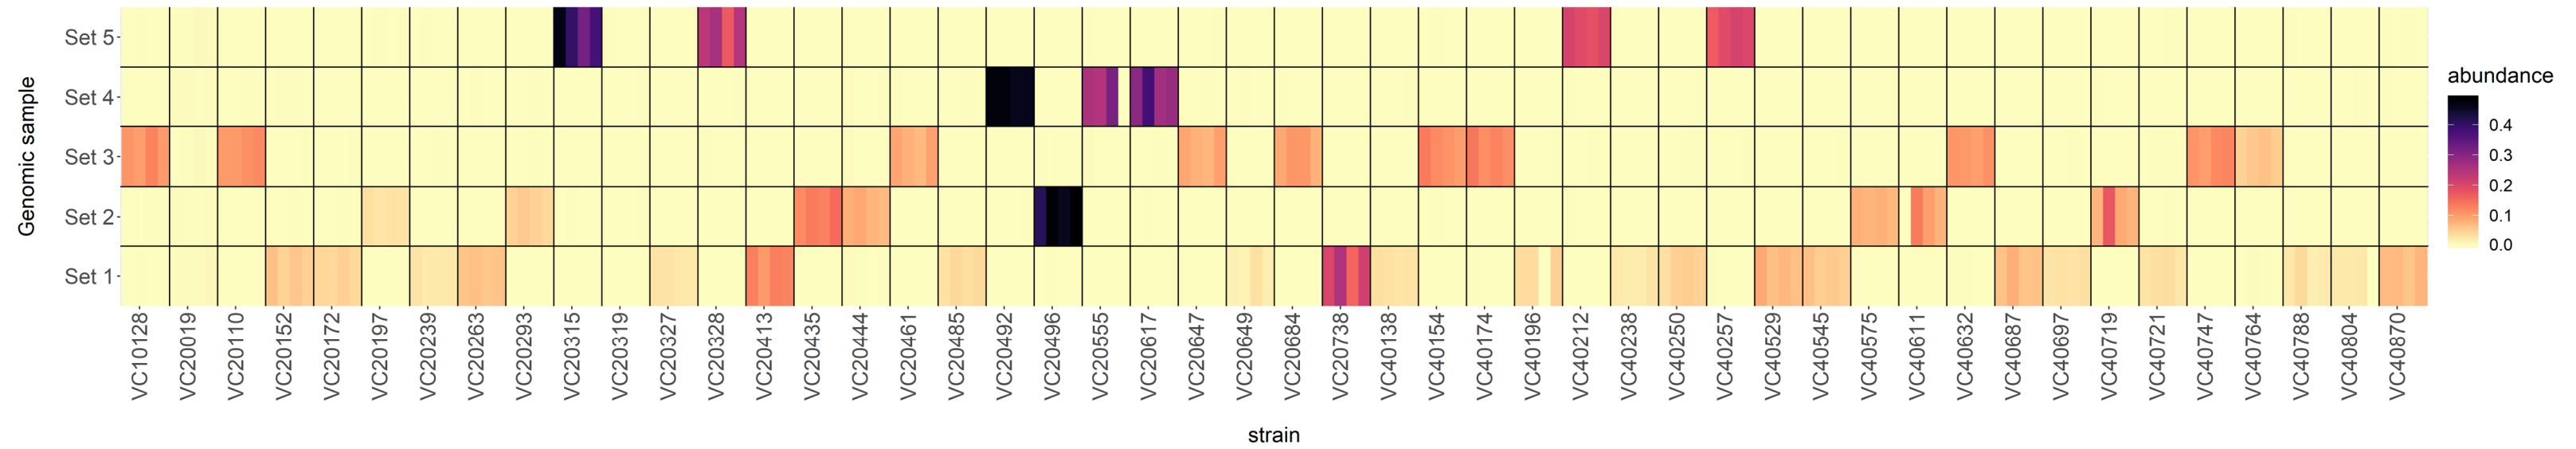**B****Total MIP reads by genomic sample**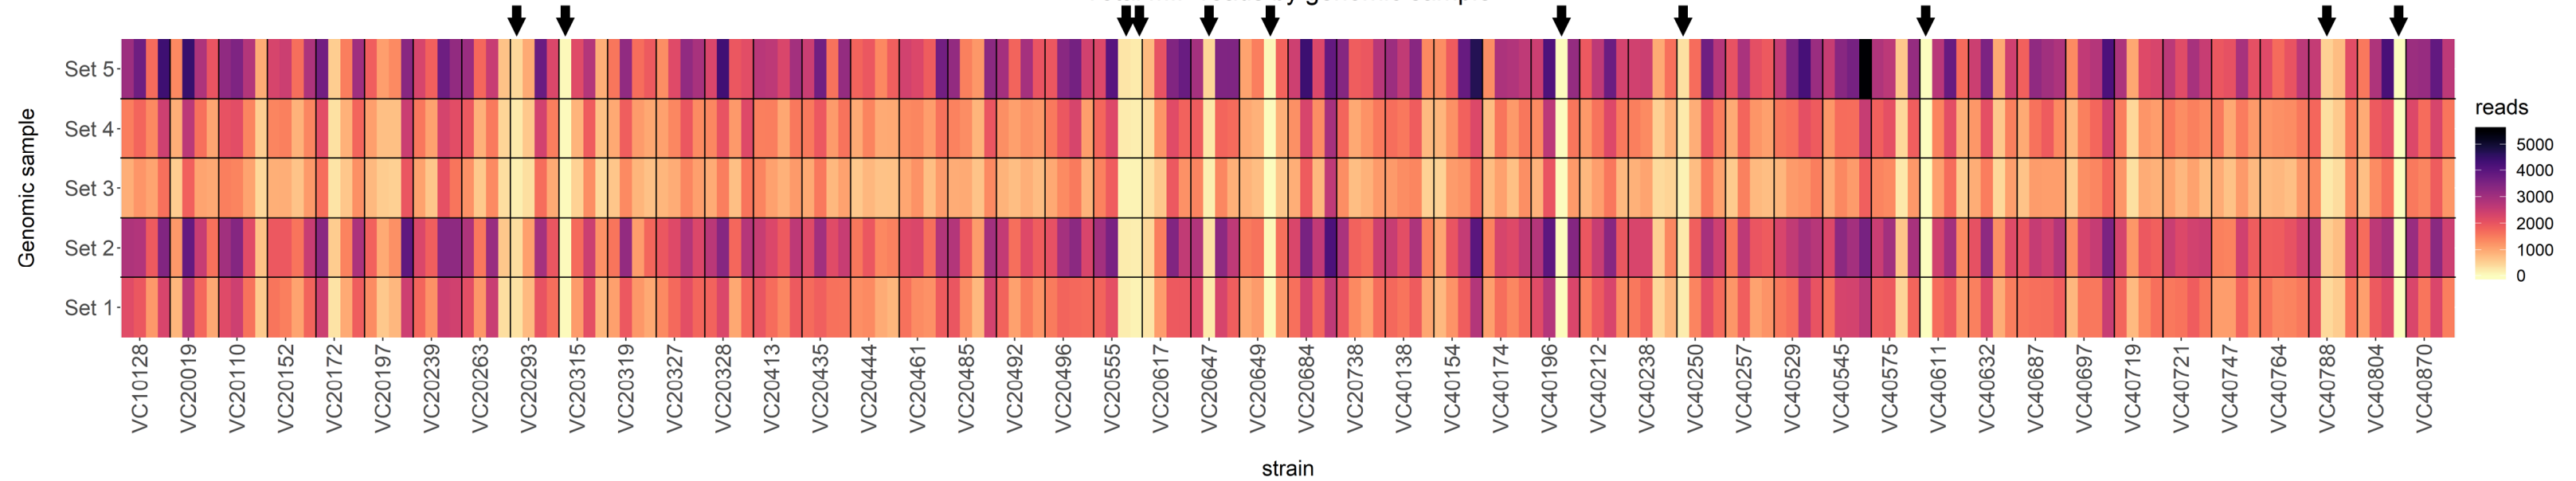

**Supplemental Figure S1. MIPs provide sufficient read depth to specific subpopulations of strain abundance in complex compositions of genomic DNA.** (A) Strains from non-overlapping sets of mixed genomic samples are identified using a multiplexed pool of MIPs. Strain abundance for each set is indicated by the heatmap legend with each strain subdivided into four abundance estimations calculated from MIP sequencing data. (B) A heatmap of total reads per MIP per set broken down by specific strain and MIP with black arrows indicating probes with total reads below 20% of the mean read depth across the set.
