# Supplementary material
Source: publisher figshare collection journal article supplement (https://gsajournals.figshare.com/articles/dataset/_/12869570)
Supplement: Supplementary file 10 [file 2]

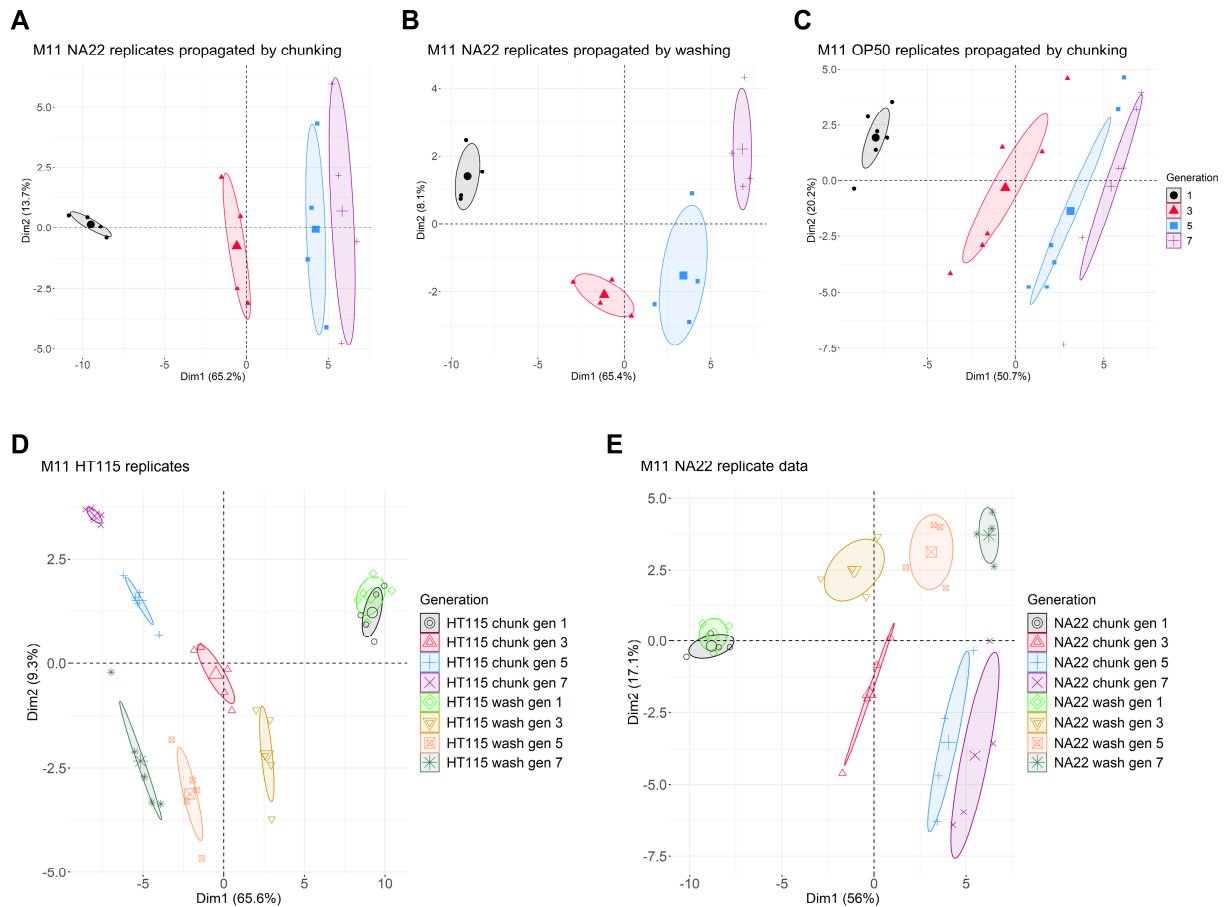

**Supplemental Figure S3. Principal component analysis of M11 samples suggest consistent changes to population structure at each generation.** PCA of pool M11 datasets separated by combined food source and transfer method into (A) NA22 replicates propagated by chunking, (B) NA22 replicates propagated by washing and (C) OP50 replicates propagated by chunking. PCA of pool M11 HT115 replicate (D) and NA22 replicate (E) data projected along principal components 1 and 2 with samples identified by combination of transfer method (chunking or washing) and sample generation (1, 3, 5, or 7). Large points represent the center of each cluster with the shaded area representing an ellipse with 95% confidence level.
